# Supplementary material
Source: HighWire-hosted journal article supplement (https://cmajopen.ca/highwire/filestream/87309/field_highwire_adjunct_files/1/open-2021-0071-original_submission.pdf)
Supplement: open-2021-0071-original_submission.pdf [file open-2021-0071-original_submission.pdf]

1  
2  
3  
4  
5  
6 **Effect of electronic medication reconciliation at the time of hospital discharge on**  
7 **inappropriate medication use in the community: a time series analysis.**  
8  
9

10 Blayne Welk\* MD MSc<sup>1,2,3</sup> Lauren Killin\* MSc<sup>2,3</sup>, Jennifer N. Reid MSc<sup>3</sup>, Kelly K. Anderson PhD<sup>2,3</sup>,  
11 Salimah Z. Shariff PhD<sup>3,4</sup>, Andrew Appleton MD<sup>5</sup>, Glen Kearns HBA, MRE, CHE<sup>6</sup>, Amit X. Garg MD  
12 MSc PhD<sup>2,3,5</sup>  
13  
14  
15  
16  
17

18 1 Department of Surgery, Western University, London, Ontario, Canada

19 2 Department of Epidemiology and Biostatistics, Western University, London, Ontario, Canada

20 3 ICES, Ontario, Canada

21 4 Arthur Labatt Family School of Nursing, Western University, London, Ontario, Canada

22 5 Department of Medicine, Western University, London, Ontario, Canada

23 6 St Joseph's Healthcare, and London Health Sciences Center, London Ontario Canada  
24  
25  
26  
27  
28

29 \*Blayne Welk and Lauren Killin contributed equally to the role of first author.  
30  
31

32 *Correspondence:*

33 Blayne Welk, MD FRCSC MSc

34 Associate Professor, Department of Surgery and Epidemiology & Biostatistics, Western  
35 University  
36

37 Room B4-667

38 St Joseph's Health Care

39 268 Grosvenor Street London ON N6A 4V2

40 Telephone: 519 646-6367 | Fax: 519 646-6037

41 bkwelk@gmail.com  
42  
43  
44  
45  
46

47 *Funding Statement:* The study was supported by a grant from the Academic Medical  
48 Organization of Southwestern Ontario Innovation Fund (#INN16-011), and the Lawson Strategic  
49 Research Fund, in partnership with the Clinical Informatics division of London Health Sciences  
50 Center & St Joseph's Hospital.  
51  
52  
53  
54

55 The authors declare no competing interests.  
56  
57  
58  
59  
60

## Acknowledgements

The study was carried out by ICES Western. ICES is funded by an annual grant from the Ontario Ministry of Health and Long-Term Care (MOHLTC). Core funding for ICES Western is provided by several partners including the Academic Medical Organization of Southwestern Ontario (AMOSO), the Schulich School of Medicine and Dentistry (SSMD), Western University, and the Lawson Health Research Institute (LHRI). The opinions, results and conclusions are those of the authors and are independent from the funding sources. No endorsement by ICES, AMOSO, SSMD, LHRI, or the MOHLTC is intended or should be inferred. Parts of this material are based on data and/or information compiled and provided by CIHI. However, the analyses, conclusions, opinions and statements expressed in the material are those of the author(s), and not necessarily those of CIHI. We thank IQVIA Solutions Canada Inc. for use of their Drug Information Database. Cerner Data was provided through the cooperation of the London regional hospitals. Dr. Amit Garg was supported by the Dr. Adam Linton Chair in Kidney Health Analytics, and a Clinician Investigator Award from the Canadian Institutes of Health Research.

## Abstract

**Background:** We examined trends in potentially inappropriate medication use after hospital discharge before and after hospitals in our region adopted an enhanced electronic medication reconciliation system (EEMRS).

**Methods:** We conducted a retrospective time series analysis in three tertiary care hospitals in London, Ontario (2011-2019) using linked healthcare data. We studied patients over 66 years of age who were discharged from hospital (n=18,405). Starting in 2014, physicians were required to complete an EEMRS module for each discharged patient. The primary process outcome was continued receipt of a benzodiazepine, antipsychotic or gastric acid suppressant as an outpatient, when these medications were first started during the hospital stay. The primary clinical outcome was a 90-day return to hospital with a fall or fracture amongst those who received a new benzodiazepine or antipsychotic during their hospital stay. Segmented linear regression was used for the analysis.

**Results:** Patients and hospitalisation characteristics were generally similar before and after EEMRS implementation. Prior to EEMRS use, 16.3% of patients received a prescription for a benzodiazepine, antipsychotic or gastric acid suppressant after their hospital stay. After EEMRS use, there was a significant and immediate 7.0% absolute decline in this proportion (95%CI 4.5-9.5 p<0.01). Prior to EEMRS use, 4.1% of discharged patients who newly received a benzodiazepine or antipsychotic during their hospital stay returned to hospital with a fracture or fall within 90 days. Following EEMRS use, there was a significant and immediate 2.3% absolute decline (95%CI 0.3-4.3, p=0.03).

**Interpretation:** EEMRS at the time of discharge can reduce potential inappropriate medication use and associated adverse events when patients transition back to the community.

## Introduction

Medication reconciliation is the process of ensuring a patient's medication record is updated with the most appropriate information. This is important at transitions of care to prevent unintended errors which can lead to patient harm. Several systematic reviews show medication reconciliation reduces medication discrepancies which may reduce adverse patient outcomes, hospital readmissions, emergency department visits, and excess healthcare costs.(1–3) For example, medications that were intended for use only while a patient was admitted to hospital can cause harm if they are inadvertently prescribed to the patient for use after hospital discharge.(4) Medication reconciliation is a required operational practice by Accreditation Canada and is identified as a priority indicator of safe and efficient clinical care by Health Quality Ontario.(5)

Initially, medication reconciliation was performed using a pen-and-paper process. However, the introduction of hospital-based electronic medical record (EMR) systems has led to the creation of enhanced electronic medication reconciliation systems (EEMRS) that interact directly with the patient's hospital medication records. Canada has invested billions of dollars in hospital based EMRs with the intention of improving hospital efficiency and patient outcomes.(6) However, the effect of the different components of these commercial EMR systems, such as EEMRS, on patient care is unclear.(7) Previous studies have reported conflicting results as to whether EEMRS can further reduce medication discrepancies, and there is little evidence that they improve clinically relevant outcomes.(8,9)

In 2014 regional hospitals in London, Ontario upgraded their EMR and added an EEMRS. Our objective was to examine the trends in potential inappropriate medication use after hospital discharge before and after EEMRS adoption. We evaluated both a process outcome (the proportion of patients 66 years of age and older who received a benzodiazepine, antipsychotic or gastric acid suppressant as an outpatient, when these medications were first started during the hospital stay) and a clinical outcome (return to hospital with a fall or fracture amongst those who received a new benzodiazepine or antipsychotic during their hospital stay).

## Methods

### *Study design & Setting*

All residents of Ontario have access to a single universal healthcare system. We conducted a retrospective time series analysis using routinely collected health data between February 1, 2011 and March 26, 2019 from three Southwestern Ontario, Canada hospitals: St. Joseph's Health Care London (SJHC), and the University and Victoria Hospital campuses of London Health

1  
2  
3 Sciences Centre (LHSC). These hospitals are large academic centres and in total have about  
4 2,000 inpatient beds for acute and chronic care. They provide tertiary care to a population of  
5 almost 2 million people. This project was approved by the Western University research ethics  
6 board (#112138). Study reporting follows recommended guidelines for observational studies  
7 that use routinely collected health data (appendix 1).(10)  
8  
9

### 10 11 *Data sources*

12 We used unique encoded identifiers to link data from the London Hospital's Cerner EMR to 12  
13 healthcare databases held at ICES (including the Canadian Institute for Health Information  
14 Discharge Abstract Database and Same Day Surgery Database, Ontario Health Insurance Plan  
15 Database, the National Ambulatory Care Reporting System Database, Registered Persons  
16 Database, and the Ontario Drug Benefit Database). These datasets were linked using unique  
17 encoded identifiers and analysed at ICES. Additional information on the databases and their  
18 validity is provided in appendix 2. We used these data sources to measure patient  
19 characteristics, prescription drug use, covariate information and outcome data. Variable  
20 definitions and the relevant administrative codes are in appendix 3.  
21  
22  
23  
24  
25  
26

### 27 *Enhanced electronic medication reconciliation system*

28 The three London hospitals upgraded the existing Cerner EMR (a supplier of EMR solutions to  
29 over 25,000 facilities worldwide) in April-May of 2014. This upgrade was implemented across all  
30 of the hospitals in a single day, after which physicians used the new EEMRS in the Cerner EMR.  
31 This system replaced a long-standing paper-based process. The paper-based process required  
32 the physician or pharmacist to manually copy medications from the medication administration  
33 record to a carbon-copy form and use tick boxes to indicate changes. The new EEMRS required  
34 physicians to complete a computerized discharge module and explicitly indicate whether  
35 patients should continue each medication that was ordered during their hospital stay.  
36  
37  
38  
39  
40

### 41 *Identification of hospitalisation discharge episodes*

42 Using the London Hospital's Cerner data, we identified all patients 66 years of age and older  
43 (and therefore eligible for government funded outpatient medication coverage) who were  
44 discharged to home or long-term care during the study period. Discharge episodes from our  
45 consecutive 98-month study time period were divided into 2-month intervals. Intervals 1-19  
46 represented the period before EEMRS use, and intervals 20-49 represented the period with  
47 EEMRS use.  
48  
49  
50

51  
52 We included only hospital discharge episodes where the patient was newly dispensed a  
53 medication of interest during their hospital stay (as described below, a benzodiazepine,  
54 antipsychotic or gastric acid suppressant). We excluded discharge episodes where the patient  
55  
56  
57  
58  
59  
60

1  
2  
3 had inaccurate data characteristics, died during their hospitalization or within 5 days of  
4 discharge, had a length of stay equal to zero, had an admission to a hospital in the previous 6  
5 months (to reduce carry-over effects from the prior admission), and those who were  
6 readmitted to hospital or returned to an emergency room within 5 days of discharge (as they  
7 may not have had an opportunity to fill discharge prescriptions). We also excluded discharge  
8 episodes if the patient had a hospital admission diagnosis in the prior 6 months that suggested  
9 the medications of interest would be appropriate to continue as an outpatient (for example we  
10 excluded patients with a diagnosis of gastrointestinal bleed as the use of a proton pump  
11 inhibitor after discharge would likely be appropriate). For a full list of these conditions and  
12 coding algorithms see appendix 4. To maximise data quality, we only retained records where  
13 the admission and discharge dates recorded in Cerner matched those in CIHI-DAD. The unit of  
14 analysis was a hospital discharge, and therefore patients could be included multiple times if  
15 they were re-hospitalised more than 6 months after their last hospitalisation.  
16  
17  
18  
19  
20  
21  
22

### 23 *Outcomes*

24 We defined three classes of medications as potentially inappropriate (individual medications  
25 are listed in appendix 5). They were selected because of their frequency of use in elderly  
26 hospitalized patients(4), well-known guidelines suggesting they be avoided if possible in the  
27 elderly(11), and their potential for clinically important adverse drug reactions.  
28  
29

- 30 1. Benzodiazepines: sedatives that are commonly used to treat temporary hospital-based  
31 sleep disturbances but can lead to cognitive impairment, sedation, falls, and dependence or  
32 addiction.(12)  
33
- 34 2. Antipsychotics: often used off-label for agitation and hospital-induced delirium. Long-term  
35 use is associated with anticholinergic effects, tardive dyskinesia, falls, arrhythmias, and  
36 cognitive decline.(13)  
37
- 38 3. Gastric acid suppressants: often prescribed for general hospital-based gastrointestinal  
39 symptoms. Long-term use is associated with an increased risk of pneumonia, *Clostridium*  
40 *difficile* infection, fracture risk (with prolonged use), hypomagnesemia and significant drug  
41 interactions.(14,15)  
42  
43  
44

45 The primary process outcome was filling a prescription for one of these medications in the  
46 outpatient setting within five days of hospital discharge. Patients could be prescribed more  
47 than one of these medication classes. We hypothesized there would be less continued  
48 outpatient use of these medications after implementation of the EEMRS.  
49  
50  
51

52 The primary clinical outcome was a hospital visit for a fall or fracture within 90 days of hospital  
53 discharge among the subgroup of patients who received a benzodiazepine or an antipsychotic  
54 in hospital. Falls and fractures in the elderly are important and relevant outcomes to patients  
55  
56  
57  
58  
59  
60

1  
2  
3 and clinicians because of their association with traumatic brain injury, institutionalisation, and  
4 mortality.(19–21) Details on how we defined this outcome are listed in appendix 6. We  
5 hypothesized there would be less falls and fractures in this patient group after implementation  
6 of the EEMRS.  
7  
8  
9

### 10 *Statistical analysis*

11 The patient and hospital admission characteristics for hospital discharge episodes before the  
12 EEMRS were compared to those after the EEMRS using standardised differences.(16) The  
13 association between EEMRS implementation of and outcomes was assessed using segmented  
14 linear regression analysis of 19 intervals before, and 30 intervals after implementation. This  
15 number of intervals was adequate for a time series analysis.(17) The model included regression  
16 coefficients to determine whether there was a significant trend (slopes before and after EEMRS  
17 use), or a significant interval change (an immediate change after EEMRS use). Model  
18 assumptions of homoscedasticity, linearity, and normality were confirmed graphically. The  
19 absence of autocorrelation was confirmed using the Durbin-Watson statistic, and Cook's D  
20 statistic was used to ensure there were no unusual or influential data points.(18) The chi-square  
21 test was used to assess differences in proportions. Statistical analyses were carried out in SAS  
22 9.4, and two-sided p-values<0.05 were considered statistically significant.  
23  
24  
25  
26  
27  
28  
29

### 30 **Results**

31  
32 We identified 15,932 patients who had a total of 18,405 hospital discharge episodes (Figure 1).  
33 Comorbidities were frequent in our patient population (Table 1); the patient characteristics of  
34 the hospital discharge episodes before and after EEMRS use were similar, aside from a lower  
35 proportion of ischemic heart disease after EEMRS use, and a slightly lower number of prior  
36 specialist visits. The hospital admission characteristics were also similar between the two time  
37 periods, aside from the length-of-stay which was a median of 1 day shorter after EEMRS use  
38 (table 2). The top three most common admission diagnoses (representing approximately 15% of  
39 admissions) were the same both before and after EEMRS use (coronary artery disease,  
40 osteoarthritis, and aortic valve stenosis).  
41  
42  
43  
44  
45  
46

47 A potentially inappropriate study medication was dispensed in the outpatient setting in 14.3%  
48 (n=2641) of 18,405 hospital discharge episodes. After the implementation of the EEMRS, there  
49 was a sudden and significant decline in hospital discharges associated with such dispensing (-  
50 7.0% (95% CI -9.5, -4.5)) and there was a small but significant change in the slope over time (-  
51 0.8% (95% CI -1.6, -0.4)) per 2-month interval, details in Table 3 and Figure 2). The outpatient  
52 medication prescriptions that declined most after EEMRS use were benzodiazepines and gastric  
53 acid suppressants (table 4).  
54  
55  
56  
57  
58  
59  
60

1  
2  
3  
4  
5 There were 5,240 hospital discharge episodes (4,809 patients) where patients were newly  
6 dispensed an antipsychotic or a benzodiazepine during their hospital stay (cohort details shown  
7 in appendix 7). After these hospital discharge episodes, 3.3% (n=175/5,240) presented to a  
8 hospital or emergency department with a fall or fracture within 90 days of hospital discharge.  
9 There was a significant drop in fall/fracture immediately after EEMRS implementation (-2.3%,  
10 95% CI -4.3, -0.3), and the change in slope was non-significant (table 4, Figure 3).  
11  
12  
13

### 14 **Interpretation**

15  
16  
17 When patients move between care settings there is a potential for unintentional medication  
18 errors, and discharge from hospital is a particularly at risk transition.(1) We report on the effect  
19 of an EERMS that was introduced through a commercial EMR upgrade in three regional  
20 hospitals. We found the introduction of the EERMS was associated with an immediate,  
21 significant decrease in the proportion of older patients who filled prescriptions for potentially  
22 inappropriate, unsafe medications (benzodiazepines, antipsychotics, and gastric acid  
23 suppressants) after hospital discharge. Importantly, in the subset of patients who were  
24 prescribed benzodiazepines or antipsychotics, there was a corresponding immediate drop in  
25 the proportion of patients who returned to hospital with a fall or fracture, which is a known  
26 side effect of both these medications in the elderly.(12,13)  
27  
28  
29  
30  
31  
32

33 While many interventions have been developed to improve medication reconciliation, most are  
34 multi-faceted approaches that require pharmacist involvement, post-discharge follow-up, or  
35 patient education.(22) Despite significant technological upgrades in the medication  
36 reconciliation process, only a few studies have examined commercially available EEMRS, and  
37 there is limited evidence that demonstrate these updates lead to improvements in patient  
38 care.(23,24) For example, the MARQUIS study was a multi-center quality improvement study  
39 that was carried out at five hospitals in the United States. The implementation of 11  
40 interventions designed to support medication reconciliation resulted in a small reduction in  
41 medication discrepancies, but there was no significant reduction in potentially harmful  
42 discrepancies.(25) A cluster-randomized study from selected hospital units at McGill University  
43 Health Center showed that an electronic tool that integrated community and hospital pharmacy  
44 records and introduced an EEMRS led to a reduction in medication discrepancies, but did not  
45 reduce adverse drug events or future hospital encounters.(8) In contrast, our study focused on  
46 three specific medication classes that have the potential to cause harm, rather than all possible  
47 medications. Our results provide evidence of an added benefit from an EEMRS, which when  
48 shared with physicians and health administrators at other hospitals may improve their buy-in  
49 for adopting such a system.  
50  
51  
52  
53  
54  
55  
56  
57  
58  
59  
60



1  
2  
3  
4  
5 Our study is timely and relevant, as many Canadian hospitals are deliberating whether to adopt  
6 an EEMRS.(26) Future efforts should continue to evaluate the clinical benefit of EMR systems in  
7 Canada. Theoretical benefits associated with new systems and processes should continue to be  
8 evaluated to ensure they are usable and improve patient care. EMR modules that require  
9 physician completion should be selected judiciously, as these new processes are linked to  
10 changes in workflow and additional administrative tasks which can lead to burnout and  
11 frustration in the workplace.(27)  
12  
13  
14  
15

### 16 **Limitations**

17 We used routinely collected data to conduct our study, therefore there is a possibility of  
18 misclassification of study variables. The continued use of study medications after hospital  
19 discharge was likely appropriate in some patient discharges in our study, and thus we use the  
20 terminology potentially inappropriate medication use. We could only look at dispensed  
21 prescriptions, therefore we may have underestimated the outcome if patients received  
22 prescriptions they did not fill. The use of segmented regression is an appropriate method for  
23 evaluating the longitudinal effect of an intervention, however it is still a quasi-experimental  
24 approach which is susceptible to confounding. Finally, this study was carried out in older adults,  
25 and represents the impact of a transition from a hospital-specific paper-based medication  
26 reconciliation process to a commercially implemented EEMRS; these results may not be  
27 generalizable to other patient populations, or other EEMRS implementations.  
28  
29  
30  
31  
32  
33

### 34 **Conclusion**

35 The implementation of a commercially available EEMRS in three Canadian hospitals was  
36 associated with a significant and immediate decrease in the proportion of patients who filled a  
37 potentially inappropriate prescription for a benzodiazepines, antipsychotics, or gastric acid  
38 suppressants when they transitioned back to the community. Among people who were exposed  
39 to benzodiazepines or antipsychotics in hospital, use of the EEMRS was associated with a  
40 significant lower chance of patients returning to a hospital or emergency department due to a  
41 fall or fracture following hospital discharge.  
42  
43  
44  
45  
46  
47  
48  
49  
50  
51  
52  
53  
54  
55  
56  
57  
58  
59  
60

Table 1. Patient characteristics from hospital discharge episodes before and after the implementation of a hospital-based electronic medication reconciliation program

|                                                                                                  | Before (N=5,971) | After (N=12,434) | Standardized difference |
|--------------------------------------------------------------------------------------------------|------------------|------------------|-------------------------|
| <b>Demographics</b>                                                                              |                  |                  |                         |
| Age (Median (IQR))                                                                               | 74 (69-80)       | 74 (69-80)       | 5%                      |
| Male sex                                                                                         | 3,350 (56.1%)    | 6,853 (55.1%)    | 2%                      |
| Lowest income quintile                                                                           | 1,052 (17.6%)    | 2,352 (18.9%)    | 3%                      |
| Highest income quintile                                                                          | 1,334 (22.3%)    | 2,544 (20.5%)    | 5%                      |
| Long Term Care resident                                                                          | 41 (0.7%)        | 91 (0.7%)        | 1%                      |
| <b>Comorbidities</b>                                                                             |                  |                  |                         |
| Charlson Comorbidity score (Median (IQR))                                                        | 0 (0-1)          | 0 (0-1)          | 0                       |
| Chronic Obstructive Pulmonary Disease                                                            | 438 (7.3%)       | 886 (7.1%)       | 1%                      |
| Diabetes                                                                                         | 485 (8.1%)       | 745 (6.0%)       | 8%                      |
| Hypertension                                                                                     | 766 (12.8%)      | 1,235 (9.9%)     | 9%                      |
| Ischemic heart disease                                                                           | 1,470 (24.6%)    | 2,452 (19.7%)    | 11%                     |
| Liver disease                                                                                    | 64 (1.1%)        | 192 (1.5%)       | 4%                      |
| Inflammatory bowel disease                                                                       | 707 (11.8%)      | 1,459 (11.7%)    | 0                       |
| Renal disease                                                                                    | 394 (6.6%)       | 923 (7.4%)       | 3%                      |
| Arthritis                                                                                        | 38 (0.6%)        | 95 (0.8%)        | 2%                      |
| Stroke                                                                                           | 161 (2.7%)       | 362 (2.9%)       | 1%                      |
| Cerebrovascular disease                                                                          | 214 (3.6%)       | 464 (3.7%)       | 1%                      |
| Dementia                                                                                         | 25 (0.4%)        | 60 (0.5%)        | 1%                      |
| Congestive heart failure                                                                         | 947 (15.9%)      | 2,043 (16.4%)    | 2%                      |
| <b>Prior healthcare utilization</b>                                                              |                  |                  |                         |
| Outpatient Internal medicine specialist visits in previous year (Median (IQR))                   | 0 (0-1)          | 0 (0-1)          | 21%                     |
| Primary care visits in previous year (Median (IQR))                                              | 3 (1-8)          | 3 (1-8)          | 0                       |
| <b>Medication utilization</b>                                                                    |                  |                  |                         |
| Number of medications is previous year (Median (IQR))                                            | 7 (4-11)         | 7 (4-11)         | 1%                      |
| Polypharmacy at admission ( $\geq 10$ different daily prescription medications in the last year) | 2,075 (34.8%)    | 4,249 (34.2%)    | 1%                      |

IQR: Interquartile range

Table 2. Hospitalisation characteristics from hospital discharge episodes before and after the implementation of a hospital-based electronic medication reconciliation program.

|                                        | Before (N=5,971) | After (N=12,434) | Standardized difference |
|----------------------------------------|------------------|------------------|-------------------------|
| Hospital length of stay (Median (IQR)) | 7 (4-12)         | 6 (3-10)         | 21%                     |
| Type of inpatient service              |                  |                  |                         |
| Medical                                | 1,783 (29.9%)    | 4,098 (33.0%)    | 7%                      |
| Surgical                               | 3,957 (66.3%)    | 7,850 (63.1%)    | 7%                      |
| Other                                  | 231 (3.9%)       | 486 (3.9%)       | 0                       |
| ED to inpatient transfer               | 2,403 (40.2%)    | 4,699 (37.8%)    | 5%                      |
| ICU admission                          | 1,727 (28.9%)    | 3,289 (26.5%)    | 6%                      |
| Surgery/procedure performed            | 5,247 (87.9%)    | 11,254 (90.5%)   | 8%                      |
| Discharged to Long-term care           | 184 (3.1%)       | 249 (2.0%)       | 7%                      |

IQR: Interquartile range, ED: Emergency Department, ICU: Intensive Care Unit

1  
2  
3  
4  
5  
6  
7  
8  
9  
10  
11  
12  
13  
14  
15  
16  
17  
18  
19  
20  
21  
22  
23  
24  
25  
26  
27  
28  
29  
30  
31  
32  
33  
34  
35  
36  
37  
38  
39  
40  
41  
42  
43  
44  
45  
46  
47  
48  
49  
50  
51  
52  
53  
54  
55  
56  
57  
58  
59  
60

Table 3. Segmented regression analysis for the primary process and clinical outcomes.

|                          | <b>Slope Before</b>                  | <b>Absolute Change<br/>immediately after EEMRS</b> | <b>Slope After</b>                  |
|--------------------------|--------------------------------------|----------------------------------------------------|-------------------------------------|
| Primary process outcome  | +0.42% (95% CI [+0.2, +0.6] p<0.01)  | -7.0% (95% CI [-9.5, -4.5] p<0.01)                 | -0.40% (95% CI [-0.6, -0.2] p<0.01) |
| Primary clinical outcome | +0.06% (95% CI [-0.09, +0.2] p=0.43) | -2.32% (95% CI [-4.3,-0.3] p=0.03)                 | -0.02% (95% CI [-0.2, +0.1] p=0.78) |

Confidential

Table 4. Proportion of hospital discharge episodes with a primary process outcome (receipt of a medication of interest within 5 days of discharge) overall and by medication class.

|                           | <b>Before</b>     | <b>After</b>         | <b>Absolute difference (95% CI)</b> | <b>p-value</b> |
|---------------------------|-------------------|----------------------|-------------------------------------|----------------|
| All medications           | 971/5,971 (16.3%) | 1,670/12,434 (13.4%) | -2.9% (-3.9, -1.7)                  | p<0.01         |
| Antipsychotics            | 20/438 (4.6%)     | 43/986 (4.4%)        | -0.2% (-2.5, +2.1)                  | p=0.86         |
| Benzodiazepines           | 95/3047 (3.1%)    | 129/6190 (2.1%)      | -1.0% (-1.8, -0.3)                  | p<0.01         |
| Gastric Acid Suppressants | 855/4438 (19.3%)  | 1489/8727 (17.1%)    | -2.2% (-3.6, -0.8)                  | p<0.01         |

Confidential

1  
2  
3  
4  
5  
6  
7  
8  
9  
10  
11  
12  
13  
14  
15  
16  
17  
18  
19  
20  
21  
22  
23  
24  
25  
26  
27  
28  
29  
30  
31  
32  
33  
34  
35  
36  
37  
38  
39  
40  
41  
42  
43  
44  
45  
46  
47  
48  
49  
50  
51  
52  
53  
54  
55  
56  
57  
58  
59  
60

Figure 1. Cohort selection.

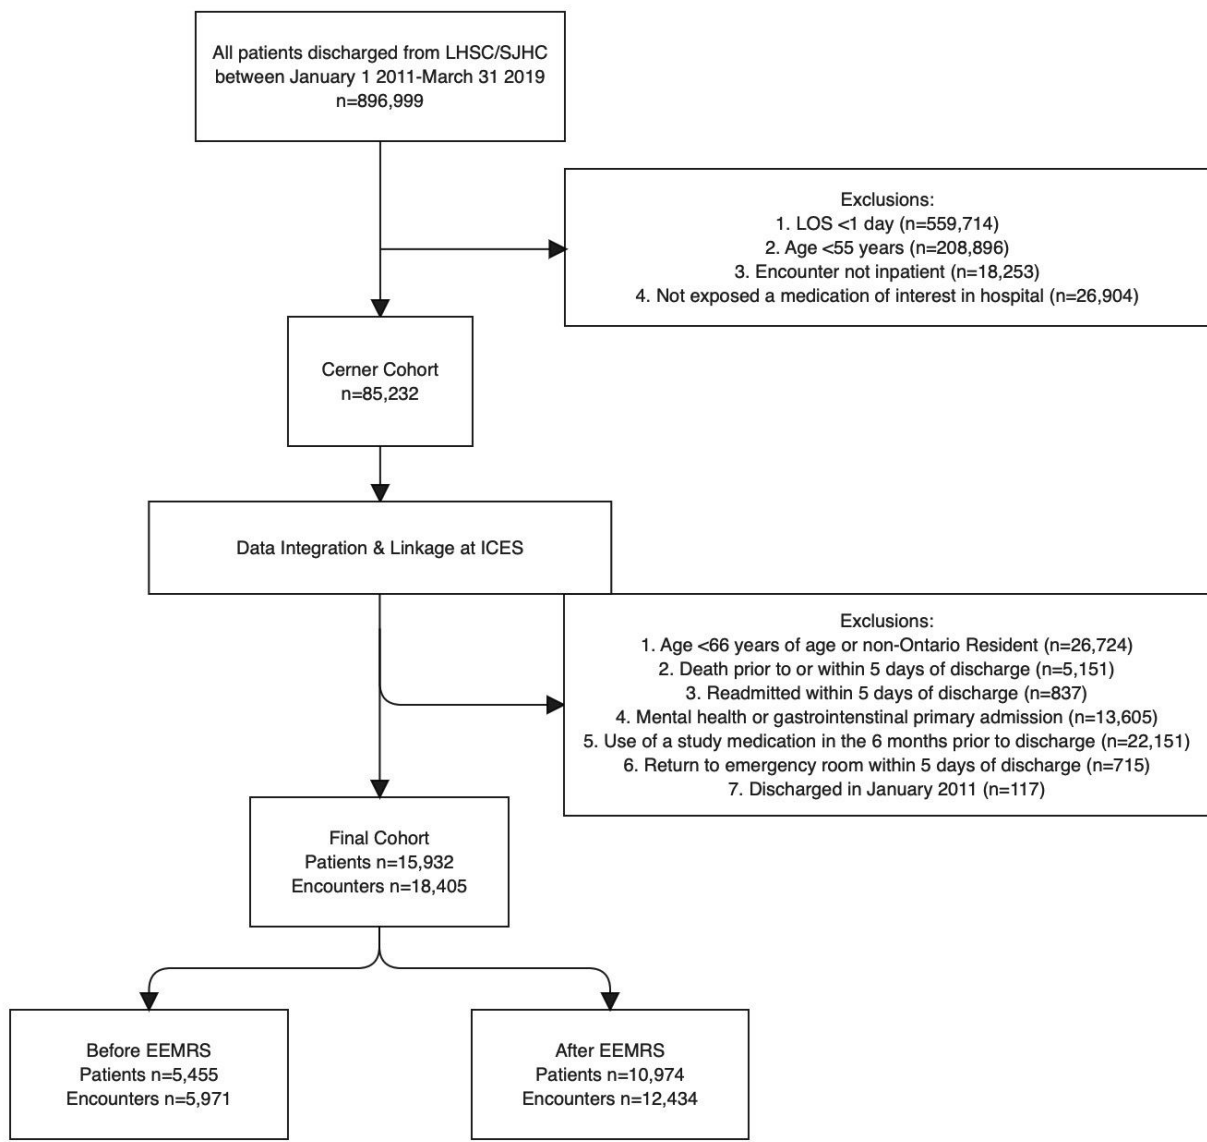

Figure 2. Proportion of hospital discharge episodes associated with a prescription filled for a benzodiazepine, gastric acid suppressant, or antipsychotic in the outpatient setting in 2-month intervals. The red line represents the date of the EEMRS implementation.

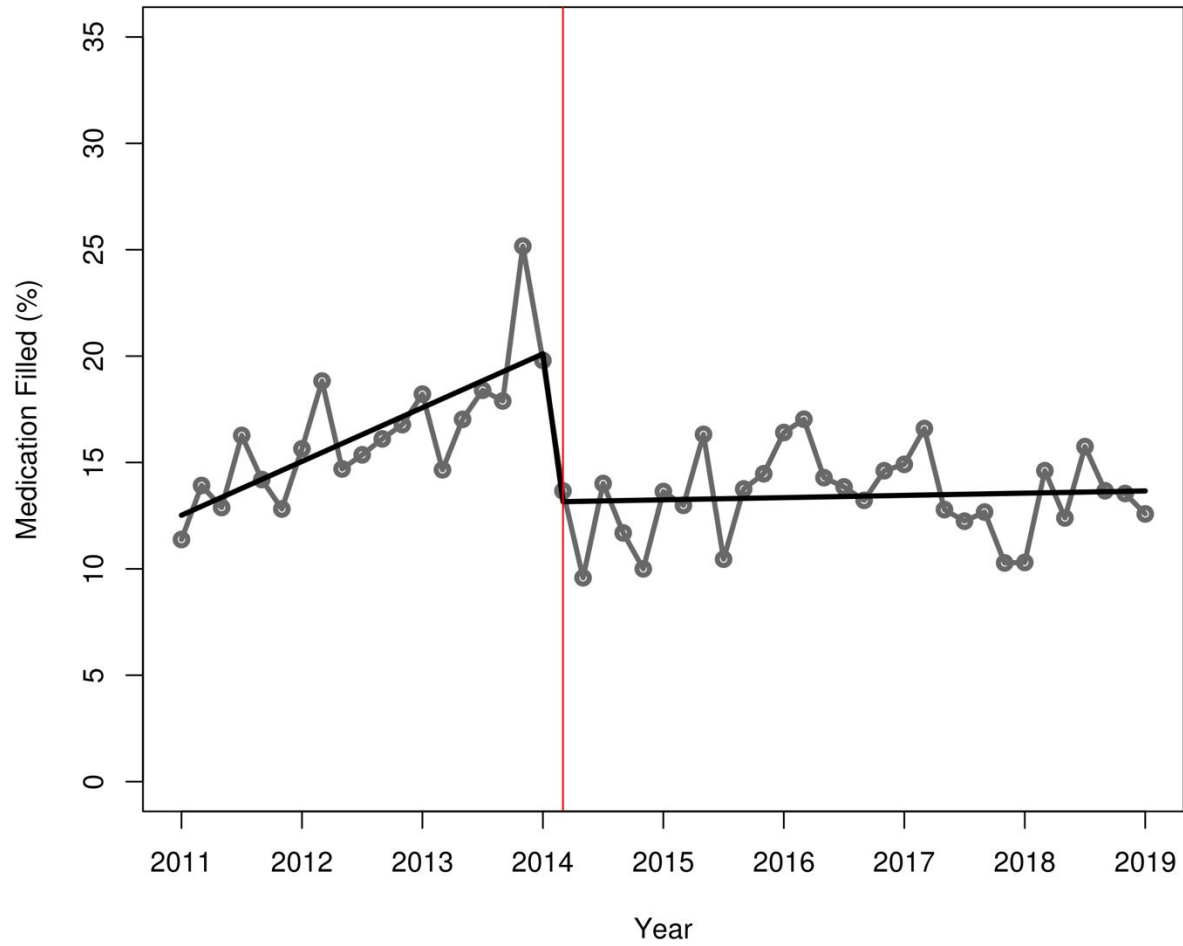

1  
2  
3  
4  
5  
6  
7  
8  
9  
10  
11  
12  
13  
14  
15  
16  
17  
18  
19  
20  
21  
22  
23  
24  
25  
26  
27  
28  
29  
30  
31  
32  
33  
34  
35  
36  
37  
38  
39  
40  
41  
42  
43  
44  
45  
46  
47  
48  
49  
50  
51  
52  
53  
54  
55  
56  
57  
58  
59  
60

Figure 3. Proportion of hospital discharge episodes in the subgroup exposed to a benzodiazepine or antipsychotic that were associated with a fall or fracture within 90 days of hospital discharge (2-month intervals). The red line represents the date of the EEMRS implementation.

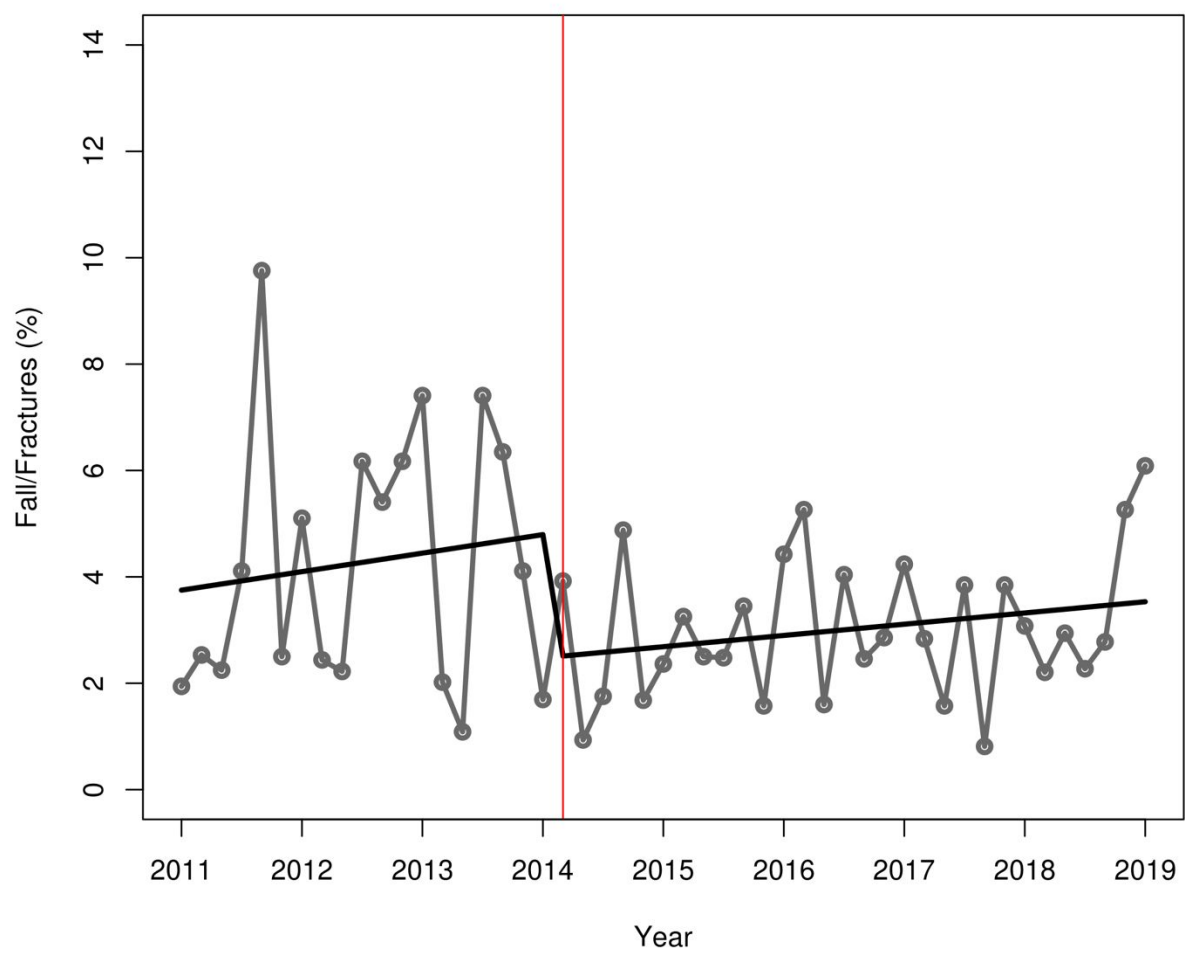



## References

1. Alqenae FA, Steinke D, Keers RN. Prevalence and Nature of Medication Errors and Medication-Related Harm Following Discharge from Hospital to Community Settings: A Systematic Review. *Drug Safety*. 2020;43(6):517–37.
2. Mueller SK, Sponsler KC, Kripalani S, Schnipper JL. Hospital-Based Medication Reconciliation Practices: A Systematic Review. *Arch Intern Med*. 2012;172(14):1057–69.
3. Kwan\* JL, Lo\* L, Sampson M, Shojania KG. Medication Reconciliation During Transitions of Care as a Patient Safety Strategy: A Systematic Review. *Ann Intern Med*. 2013;158(5\_Part\_2):397.
4. Scales DC, Fischer HD, Li P, Bierman AS, Fernandes O, Mamdani M, et al. Unintentional Continuation of Medications Intended for Acute Illness After Hospital Discharge: A Population-Based Cohort Study. *Journal of general internal medicine*. 2016 Feb;31(2):196–202.
5. Medication reconciliation at discharge [Internet]. [accessed Dec 1 2020]. Available from: <http://indicatorlibrary.hqontario.ca/Indicator/Summary/Medication-reconciliation-discharge/EN>
6. About ITAC Health | Information Technology Association of Canada [Internet]. [accessed Jan 15 2021]. 2014. Available from: <http://itac.ca/activities/itac-health/about-itac-health/>
7. Chaudhry B, Wang J, Wu S, Maglione M, Mojica W, Roth E, et al. Systematic review: impact of health information technology on quality, efficiency, and costs of medical care. *Annals of internal medicine*. 2006;144(10):742–52.
8. Tamblyn R, Abrahamowicz M, Buckeridge DL, Bustillo M, Forster AJ, Girard N, et al. Effect of an Electronic Medication Reconciliation Intervention on Adverse Drug Events: A Cluster Randomized Trial. *JAMA network open*. 2019 Sep 4;2(9):e1910756.
9. Lehnbohm EC, Stewart MJ, Manias E, Westbrook JI. Impact of medication reconciliation and review on clinical outcomes. *Annals of Pharmacotherapy*. 2014 Oct;48(10):1298–312.
10. Benchimol EI, Smeeth L, Guttman A, Harron K, Moher D, Sørensen HT, et al. The REporting of studies Conducted using Observational Routinely-collected health Data (RECORD) statement. *PLoS medicine*. 2015 Oct;12(10):e1001885.

- 1  
2  
3 11. Panel AGS 2012 BCUE. American Geriatrics Society updated Beers Criteria for potentially  
4 inappropriate medication use in older adults. *Journal of the American Geriatrics Society*. 2012  
5 Apr 1;60(4):616–31.  
6  
7
- 8 12. Bell CM, Fischer HD, Gill SS, Zagorski B, Sykora K, Wodchis WP, et al. Initiation of  
9 benzodiazepines in the elderly after hospitalization. *Journal of general internal medicine*. 2007  
10 Jul;22(7):1024–9.  
11  
12
- 13 13. Masand PS. Side effects of antipsychotics in the elderly. *The Journal of clinical psychiatry*.  
14 2000;61 Suppl 8:43-9-discussion 50-1.  
15  
16
- 17 14. Logan IC, Sumukadas D, Witham MD. Gastric acid suppressants--too much of a good thing?  
18 *Age and ageing*. 2010 Jul;39(4):410–1.  
19  
20
- 21 15. Sheen E, Triadafilopoulos G. Adverse Effects of Long-Term Proton Pump Inhibitor Therapy.  
22 *Digest Dis Sci*. 2011;56(4):931–50.  
23  
24
- 25 16. Austin PC. Using the Standardized Difference to Compare the Prevalence of a Binary  
26 Variable Between Two Groups in Observational Research. *Commun Statistics - Simul Comput*.  
27 2009;38(6):1228–34.  
28  
29
- 30 17. Yaffee RA, McGee M. An introduction to time series analysis and forecasting: with  
31 applications of SAS® and SPSS®. Academic Press, 1<sup>st</sup> Edition. 2000.  
32  
33
- 34 18. Wagner AK, Soumerai SB, Zhang F, Ross-Degnan D. Segmented regression analysis of  
35 interrupted time series studies in medication use research. *J Clin Pharm Ther*. 2002;27(4):299–  
36 309.  
37  
38
- 39 19. Bliuc D, Nguyen ND, Milch VE, Nguyen TV, Eisman JA, Center JR. Mortality risk associated  
40 with low-trauma osteoporotic fracture and subsequent fracture in men and women. *JAMA: The*  
41 *Journal of the American Medical Association*. 2009 Feb 4;301(5):513–21.  
42  
43
- 44 20. Thompson HJ, McCormick WC, Kagan SH. Traumatic brain injury in older adults:  
45 epidemiology, outcomes, and future implications. *Journal of the American Geriatrics Society*.  
46 2006 Oct;54(10):1590–5.  
47  
48
- 49 21. Tinetti ME, Kumar C. The patient who falls: “It’s always a trade-off”. *JAMA: The Journal of*  
50 *the American Medical Association*. 2010 Jan 20;303(3):258–66.  
51  
52  
53  
54  
55  
56  
57  
58  
59  
60

1  
2  
3 22. Guisado-Gil AB, Mejías-Trueba M, Alfaro-Lara ER, Sánchez-Hidalgo M, Ramírez-Duque N,  
4 Santos-Rubio MD. Impact of medication reconciliation on health outcomes: An overview of  
5 systematic reviews. *Res Soc Administrative Pharm.* 2020;16(8):995–1002.  
6  
7

8 23. Marien S, Krug B, Spinewine A. Electronic tools to support medication reconciliation: a  
9 systematic review. *J Am Med Inform Assn.* 2016;24(1):227–40.  
10  
11

12 24. Mekonnen AB, Abebe TB, McLachlan AJ, Brien JE. Impact of electronic medication  
13 reconciliation interventions on medication discrepancies at hospital transitions: a systematic  
14 review and meta-analysis. *Bmc Med Inform Decis.* 2016;16(1):112.  
15  
16  
17

18 25. Schnipper JL, Mixon A, Stein J, Wetterneck TB, Kaboli PJ, Mueller S, et al. Effects of a  
19 multifaceted medication reconciliation quality improvement intervention on patient safety:  
20 final results of the MARQUIS study. *Bmj Qual Saf.* 2018;27(12):954.  
21  
22

23 26. HIMSS Analytics-Stage 6 and 7 facilities by location [Internet]. [Accessed 2020 Dec 1].  
24 Available from: <https://www.himssanalytics.org/stage-6-7-achievement>  
25  
26

27 27. Gardner RL, Cooper E, Haskell J, Harris DA, Poplau S, Kroth PJ, et al. Physician stress and  
28 burnout: the impact of health information technology. *J Am Med Inform Assn.* 2019;26(2):106–  
29 14.  
30  
31  
32  
33  
34  
35  
36  
37  
38  
39  
40  
41  
42  
43  
44  
45  
46  
47  
48  
49  
50  
51  
52  
53  
54  
55  
56  
57  
58  
59  
60

1  
2  
3  
4  
5  
6  
7  
8  
9  
10  
11  
12  
13  
14  
15  
16  
17  
18  
19  
20  
21  
22  
23  
24  
25  
26  
27  
28  
29  
30  
31  
32  
33  
34  
35  
36  
37  
38  
39  
40  
41  
42  
43  
44  
45  
46  
47  
48  
49  
50  
51  
52  
53  
54  
55  
56  
57  
58  
59  
60

**Supplemental Material**

Appendix 1. STROBE/RECORD checklist.....2

Appendix 2. Data sources used for this study.....7

Appendix 3. Administrative definition used to define the covariates. ....10

Appendix 4. Coding definitions used to exclude patients with potential appropriate indications for benzodiazepine, antipsychotic, or gastric acid suppressant medication.....12

Appendix 5. Prescription medication names and Drug Identification Numbers (DINs) used to define the three medication groups of interest (antipsychotics, benzodiazepines and gastric acid suppressants).....14

Appendix 6. Administrative data definitions used to define fall or fracture. ....63

Appendix 7. Cohort description for patients who were dispensed an antipsychotic or a benzodiazepine during the study period. ....64

1  
2  
3  
4  
5  
6  
7  
8  
9  
10  
11  
12  
13  
14  
15  
16  
17  
18  
19  
20  
21  
22  
23  
24  
25  
26  
27  
28  
29  
30  
31  
32  
33  
34  
35  
36  
37  
38  
39  
40  
41  
42  
43  
44  
45  
46  
47  
48  
49  
50  
51  
52  
53  
54  
55  
56  
57  
58  
59  
60

## Appendix 1. STROBE/RECORD checklist.

|                           | Item No. | STROBE items                                                                                                                                                                                                                                                      | Location in manuscript where items are reported                                                       | RECORD items                                                                                                                                                                                                                                                                                                                                                                                                                                | Location in manuscript where items are reported                                                                                                                                                       |
|---------------------------|----------|-------------------------------------------------------------------------------------------------------------------------------------------------------------------------------------------------------------------------------------------------------------------|-------------------------------------------------------------------------------------------------------|---------------------------------------------------------------------------------------------------------------------------------------------------------------------------------------------------------------------------------------------------------------------------------------------------------------------------------------------------------------------------------------------------------------------------------------------|-------------------------------------------------------------------------------------------------------------------------------------------------------------------------------------------------------|
| <b>Title and abstract</b> |          |                                                                                                                                                                                                                                                                   |                                                                                                       |                                                                                                                                                                                                                                                                                                                                                                                                                                             |                                                                                                                                                                                                       |
|                           | 1        | (a) Indicate the study's design with a commonly used term in the title or the abstract<br><br>(b) Provide in the abstract an informative and balanced summary of what was done and what was found                                                                 | <i>Title, Abstract (Design)</i><br><br><i>Abstract</i>                                                | RECORD 1.1: The type of data used should be specified in the title or abstract. When possible, the name of the databases used should be included.<br><br>RECORD 1.2: If applicable, the geographic region and timeframe within which the study took place should be reported in the title or abstract.<br><br>RECORD 1.3: If linkage between databases was conducted for the study, this should be clearly stated in the title or abstract. | <i>Abstract. Note: due to numerous data sources they are further listed in the methods, data sources, and appendix 3.</i><br><br><i>Abstract</i><br><br><i>Abstract</i>                               |
| <b>Introduction</b>       |          |                                                                                                                                                                                                                                                                   |                                                                                                       |                                                                                                                                                                                                                                                                                                                                                                                                                                             |                                                                                                                                                                                                       |
| Background rationale      | 2        | Explain the scientific background and rationale for the investigation being reported                                                                                                                                                                              | <i>Introduction</i>                                                                                   |                                                                                                                                                                                                                                                                                                                                                                                                                                             |                                                                                                                                                                                                       |
| Objectives                | 3        | State specific objectives, including any prespecified hypotheses                                                                                                                                                                                                  | <i>Objective: Introduction (last paragraph), Hypothesis: Methods (outcomes)</i>                       |                                                                                                                                                                                                                                                                                                                                                                                                                                             |                                                                                                                                                                                                       |
| <b>Methods</b>            |          |                                                                                                                                                                                                                                                                   |                                                                                                       |                                                                                                                                                                                                                                                                                                                                                                                                                                             |                                                                                                                                                                                                       |
| Study Design              | 4        | Present key elements of study design early in the paper                                                                                                                                                                                                           | <i>Methods (study design and setting)</i>                                                             |                                                                                                                                                                                                                                                                                                                                                                                                                                             |                                                                                                                                                                                                       |
| Setting                   | 5        | Describe the setting, locations, and relevant dates, including periods of recruitment, exposure, follow-up, and data collection                                                                                                                                   | <i>Methods</i>                                                                                        |                                                                                                                                                                                                                                                                                                                                                                                                                                             |                                                                                                                                                                                                       |
| Participants              | 6        | (a) <i>Cohort study</i> - Give the eligibility criteria, and the sources and methods of selection of participants. Describe methods of follow-up<br><br>(b) <i>Cohort study</i> - For matched studies, give matching criteria and number of exposed and unexposed | <i>Methods (identification of hospitalisation discharge episodes, appendix 4, figure 1)</i><br><br>NA | RECORD 6.1: The methods of study population selection (such as codes or algorithms used to identify subjects) should be listed in detail. If this is not possible, an explanation should be provided.<br><br>RECORD 6.2: Any validation studies of the codes or algorithms used to select the population should be referenced. If validation was                                                                                            | <i>Methods (identification of hospitalisation discharge episodes, appendix 4, figure 1)</i><br><br><i>Primary process outcome: Levy AR, O'Brien BJ, Sellors C, Grootendorst P, Willison D. Coding</i> |

|                              |    |                                                                                                                                                                                      |                                                                       |                                                                                                                                                                                                                                                                                                                                                     |                                                                                                                                                                                                                                                                           |
|------------------------------|----|--------------------------------------------------------------------------------------------------------------------------------------------------------------------------------------|-----------------------------------------------------------------------|-----------------------------------------------------------------------------------------------------------------------------------------------------------------------------------------------------------------------------------------------------------------------------------------------------------------------------------------------------|---------------------------------------------------------------------------------------------------------------------------------------------------------------------------------------------------------------------------------------------------------------------------|
|                              |    |                                                                                                                                                                                      |                                                                       | <p>conducted for this study and not published elsewhere, detailed methods and results should be provided.</p> <p>RECORD 6.3: If the study involved linkage of databases, consider use of a flow diagram or other graphical display to demonstrate the data linkage process, including the number of individuals with linked data at each stage.</p> | <p><i>accuracy of administrative drug claims in the Ontario Drug Benefit database. The Canadian journal of clinical pharmacology. 2003;10(2):67-71.</i></p> <p><i>Primary clinical outcome: Appendix 6</i></p> <p><i>Methods, Data sources, Appendix 2, Figure 1.</i></p> |
| Variables                    | 7  | Clearly define all outcomes, exposures, predictors, potential confounders, and effect modifiers. Give diagnostic criteria, if applicable.                                            | <i>Methods (outcomes)</i>                                             | RECORD 7.1: A complete list of codes and algorithms used to classify exposures, outcomes, confounders, and effect modifiers should be provided. If these cannot be reported, an explanation should be provided.                                                                                                                                     | <i>Appendix 3, 4, 5</i>                                                                                                                                                                                                                                                   |
| Data sources/<br>measurement | 8  | For each variable of interest, give sources of data and details of methods of assessment (measurement). Describe comparability of assessment methods if there is more than one group | <i>Methods, outcomes, Appendix 3</i>                                  |                                                                                                                                                                                                                                                                                                                                                     |                                                                                                                                                                                                                                                                           |
| Bias                         | 9  | Describe any efforts to address potential sources of bias                                                                                                                            | <i>Methods (identification of hospitalisation discharge episodes)</i> |                                                                                                                                                                                                                                                                                                                                                     |                                                                                                                                                                                                                                                                           |
| Study size                   | 10 | Explain how the study size was arrived at                                                                                                                                            | NA                                                                    |                                                                                                                                                                                                                                                                                                                                                     |                                                                                                                                                                                                                                                                           |
| Quantitative variables       | 11 | Explain how quantitative variables were handled in the analyses. If applicable, describe which groupings were chosen, and why                                                        | <i>Appendix 3</i>                                                     |                                                                                                                                                                                                                                                                                                                                                     |                                                                                                                                                                                                                                                                           |

|                                                                                                 |                                  |    |                                                                                                                                                                                                                                                                                                                                                              |                                                                               |                                                                                                                                                                                                                                                                                                                    |                                                              |
|-------------------------------------------------------------------------------------------------|----------------------------------|----|--------------------------------------------------------------------------------------------------------------------------------------------------------------------------------------------------------------------------------------------------------------------------------------------------------------------------------------------------------------|-------------------------------------------------------------------------------|--------------------------------------------------------------------------------------------------------------------------------------------------------------------------------------------------------------------------------------------------------------------------------------------------------------------|--------------------------------------------------------------|
| 1<br>2<br>3<br>4<br>5<br>6<br>7<br>8<br>9<br>10<br>11<br>12<br>13<br>14<br>15<br>16<br>17<br>18 | Statistical methods              | 12 | (a) Describe all statistical methods, including those used to control for confounding<br><br>(b) Describe any methods used to examine subgroups and interactions<br><br>(c) Explain how missing data were addressed<br><br>(d) <i>Cohort study</i> - If applicable, explain how loss to follow-up was addressed<br><br>(e) Describe any sensitivity analyses | <i>Methods (statistical analysis)</i><br><br>NA<br><br>NA<br><br>NA<br><br>NA |                                                                                                                                                                                                                                                                                                                    |                                                              |
| 19<br>20<br>21<br>22<br>23<br>24<br>25<br>26<br>27<br>28                                        | Data access and cleaning methods |    |                                                                                                                                                                                                                                                                                                                                                              |                                                                               | RECORD 12.1: Authors should describe the extent to which the investigators had access to the database population used to create the study population.<br><br>RECORD 12.2: Authors should provide information on the data cleaning methods used in the study.                                                       | <i>Acknowledgements: Contributors</i><br><br><i>Figure 1</i> |
| 29<br>30<br>31<br>32<br>33<br>34<br>35<br>36<br>37                                              | Linkage                          |    |                                                                                                                                                                                                                                                                                                                                                              |                                                                               | RECORD 12.3: State whether the study included person-level, institutional-level, or other data linkage across two or more databases. The methods of linkage and methods of linkage quality evaluation should be provided.                                                                                          | <i>Methods (data sources)</i>                                |
| 38                                                                                              | <b>Results</b>                   |    |                                                                                                                                                                                                                                                                                                                                                              |                                                                               |                                                                                                                                                                                                                                                                                                                    |                                                              |
| 39<br>40<br>41<br>42<br>43<br>44<br>45<br>46<br>47<br>48<br>49<br>50<br>51                      | Participants                     | 13 | (a) Report the numbers of individuals at each stage of the study ( <i>e.g.</i> , numbers potentially eligible, examined for eligibility, confirmed eligible, included in the study, completing follow-up, and analysed)<br><br>(b) Give reasons for non-participation at each stage.<br><br>(c) Consider use of a flow diagram                               | <i>Figure 1</i><br><br><i>Figure 1</i><br><br><i>Figure 1</i>                 | RECORD 13.1: Describe in detail the selection of the persons included in the study ( <i>i.e.</i> , study population selection) including filtering based on data quality, data availability and linkage. The selection of included persons can be described in the text and/or by means of the study flow diagram. | <i>Figure 1</i>                                              |
| 52<br>53<br>54<br>55<br>56<br>57<br>58                                                          | Descriptive data                 | 14 | (a) Give characteristics of study participants ( <i>e.g.</i> , demographic, clinical, social) and information on exposures and potential confounders                                                                                                                                                                                                         | <i>Table 1, 2, Appendix 7</i>                                                 |                                                                                                                                                                                                                                                                                                                    |                                                              |

|                          |    |                                                                                                                                                                                                                                                                                                                                                                                                                                  |                                                    |                                                                                                                                                                                                                                                                                                          |                          |
|--------------------------|----|----------------------------------------------------------------------------------------------------------------------------------------------------------------------------------------------------------------------------------------------------------------------------------------------------------------------------------------------------------------------------------------------------------------------------------|----------------------------------------------------|----------------------------------------------------------------------------------------------------------------------------------------------------------------------------------------------------------------------------------------------------------------------------------------------------------|--------------------------|
|                          |    | (b) Indicate the number of participants with missing data for each variable of interest                                                                                                                                                                                                                                                                                                                                          | NA                                                 |                                                                                                                                                                                                                                                                                                          |                          |
|                          |    | (c) <i>Cohort study</i> - summarise follow-up time ( <i>e.g.</i> , average and total amount)                                                                                                                                                                                                                                                                                                                                     | NA                                                 |                                                                                                                                                                                                                                                                                                          |                          |
| Outcome data             | 15 | <i>Cohort study</i> - Report numbers of outcome events or summary measures over time                                                                                                                                                                                                                                                                                                                                             | Table 3                                            |                                                                                                                                                                                                                                                                                                          |                          |
| Main results             | 16 | (a) Give unadjusted estimates and, if applicable, confounder-adjusted estimates and their precision ( <i>e.g.</i> , 95% confidence interval). Make clear which confounders were adjusted for and why they were included<br><br>(b) Report category boundaries when continuous variables were categorized<br><br>(c) If relevant, consider translating estimates of relative risk into absolute risk for a meaningful time period | Table 3<br><br>Table 3<br><br>Table 3, Figure 2, 3 |                                                                                                                                                                                                                                                                                                          |                          |
| Other analyses           | 17 | Report other analyses done— <i>e.g.</i> , analyses of subgroups and interactions, and sensitivity analyses                                                                                                                                                                                                                                                                                                                       | NA                                                 |                                                                                                                                                                                                                                                                                                          |                          |
| <b>Discussion</b>        |    |                                                                                                                                                                                                                                                                                                                                                                                                                                  |                                                    |                                                                                                                                                                                                                                                                                                          |                          |
| Key results              | 18 | Summarise key results with reference to study objectives                                                                                                                                                                                                                                                                                                                                                                         | Discussion                                         |                                                                                                                                                                                                                                                                                                          |                          |
| Limitations              | 19 | Discuss limitations of the study, taking into account sources of potential bias or imprecision. Discuss both direction and magnitude of any potential bias                                                                                                                                                                                                                                                                       | Discussion (limitations)                           | RECORD 19.1: Discuss the implications of using data that were not created or collected to answer the specific research question(s). Include discussion of misclassification bias, unmeasured confounding, missing data, and changing eligibility over time, as they pertain to the study being reported. | Discussion (limitations) |
| Interpretation           | 20 | Give a cautious overall interpretation of results considering objectives, limitations, multiplicity of analyses, results from similar studies, and other relevant evidence                                                                                                                                                                                                                                                       | Discussion                                         |                                                                                                                                                                                                                                                                                                          |                          |
| Generalisability         | 21 | Discuss the generalisability (external validity) of the study results                                                                                                                                                                                                                                                                                                                                                            | Discussion                                         |                                                                                                                                                                                                                                                                                                          |                          |
| <b>Other Information</b> |    |                                                                                                                                                                                                                                                                                                                                                                                                                                  |                                                    |                                                                                                                                                                                                                                                                                                          |                          |



1  
2  
3  
4  
5  
6  
7  
8  
9  
10  
11  
12  
13  
14  
15  
16  
17  
18  
19  
20  
21  
22  
23  
24  
25  
26  
27  
28  
29  
30  
31  
32  
33  
34  
35  
36  
37  
38  
39  
40  
41  
42  
43  
44  
45  
46  
47  
48  
49  
50  
51  
52  
53  
54  
55  
56  
57  
58  
59  
60

|                                                           |    |                                                                                                                                                               |                         |                                                                                                                                                          |                                                                                                                                                                                                                                                                                                                                                                                                                                                                                                                                                                                                                                                                                                                                                                             |
|-----------------------------------------------------------|----|---------------------------------------------------------------------------------------------------------------------------------------------------------------|-------------------------|----------------------------------------------------------------------------------------------------------------------------------------------------------|-----------------------------------------------------------------------------------------------------------------------------------------------------------------------------------------------------------------------------------------------------------------------------------------------------------------------------------------------------------------------------------------------------------------------------------------------------------------------------------------------------------------------------------------------------------------------------------------------------------------------------------------------------------------------------------------------------------------------------------------------------------------------------|
| Funding                                                   | 22 | Give the source of funding and the role of the funders for the present study and, if applicable, for the original study on which the present article is based | <i>Acknowledgements</i> |                                                                                                                                                          |                                                                                                                                                                                                                                                                                                                                                                                                                                                                                                                                                                                                                                                                                                                                                                             |
| Accessibility of protocol, raw data, and programming code |    |                                                                                                                                                               |                         | RECORD 22.1: Authors should provide information on how to access any supplemental information such as the study protocol, raw data, or programming code. | <i>The dataset from this study is held securely in coded form at ICES. While legal data sharing agreements between ICES and data providers (e.g., healthcare organizations and government) prohibit ICES from making the dataset publicly available, access may be granted to those who meet pre-specified criteria for confidential access, available at <a href="http://www.ices.on.ca/DAS">www.ices.on.ca/DAS</a> (email: <a href="mailto:das@ices.on.ca">das@ices.on.ca</a>). The full dataset creation plan and underlying analytic code are available from the authors upon request, understanding that the computer programs may rely upon coding templates or macros that are unique to ICES and are therefore either inaccessible or may require modification.</i> |

Confidential

## Appendix 2. Data sources used for this study.

### 1. Cerner's Electronic Medical Record System

Cerner's electronic medical record system is shared across London's three hospitals. It contains information about all patient hospitalizations (visits) and is continually updated with events like registration, admission, laboratory results, physician orders, medication administration, and electronic medication reconciliation completion. CERNER data was used to identify eligible patient hospitalizations, to flag inpatients who were prescribed a medication of interest during their hospital stay, and to identify the type of service (medical, surgical, geriatric, other) a patient received during hospitalization.

### 2. Ontario Drug Benefit Database

This database contains prescription medication data for all outpatient medications dispensed as part of the Ontario Drug Benefit Program, which provides prescription drug coverage to all Ontario residents over the age of 65. Each medication is coded with a unique Drug Identification Number (DIN) and each record represents a drug claim (i.e. a dispensed prescription) paid for by the Ontario Ministry of Health and Long Term Care. This database is >99% accurate compared to manual prescription review.(1) Main data elements include: DIN (drug identifier), quantity, cost, patient, pharmacy and physician identifiers, date prescription was dispensed and a long-term care indicator. We used ODB to exclude patients with baseline use of relevant medications, to define our primary process outcome, and to measure patient characteristics such as polypharmacy.

### 3. Canadian Institute for Health Information (CIHI) Discharge Abstract Database and Same-Day Surgery Database

These databases store demographic, diagnostic, and procedural variables for all acute hospital admissions and outpatient surgeries in Ontario. Trained personnel extract information from patient records using ICD-10 codes and Canadian Coding for Health Interventions codes to create records for each patient encounter. Previous quality assessments have demonstrated good accuracy and completeness, with reabstraction studies showing >80% agreement with the top 50 main diagnosis codes when compared with reabstracted medical records.(2) We used DAD and SDS to identify eligible and ineligible discharge episodes, to define our primary clinical outcome, and to measure a variety of patient characteristics.

### 4. Ontario Health Insurance Plan (OHIP) Claims History Database

All physicians treating patients in Ontario are reimbursed by OHIP on a fee-for-service basis, and these claims are paid out by OHIP are contained in the OHIP database. Fee-for-service payments have good accuracy and completeness.(3) Information collected in the claims include patient and physician identifiers (e.g. physician number and specialty), fee codes for services provided, associated diagnoses and the date service was provided. We used OHIP to exclude identify eligible and ineligible discharge episodes, to define our primary clinical outcome, and to measure patient characteristics such as prior medical conditions.

### 5. Registered Persons Database

The RPDB provides basic demographic information (such as age, sex, postal code of residence, and date of death for deceased individuals) for all Ontario citizens. RPDB is enriched using other datasets also held by ICES. We used RPDB to apply inclusion and exclusion criteria such as restricting the age

1  
2 of patient hospitalizations, and to measure patient characteristics such as age, neighbourhood income  
3 quintile and sex.  
4

#### 5 6 6. National Ambulatory Care Reporting System (NACRS)

7 NACRS captures information on patient visits to hospitals and community-based ambulatory care  
8 services. These services include visits to the ED (Emergency Department), day surgeries, and  
9 outpatient clinics. Demographic information as well as clinical, administrative, financial, and service-  
10 specific data are collected into the database.(4) We used NACRS to identify eligible and ineligible  
11 discharge episodes, to define our primary clinical outcome, and to measure inpatient admissions from  
12 the ED as a patient characteristic.  
13  
14

#### 15 16 8. Corporate Provider Database (CPDB)

17 The CPDB contains files maintained by the MOHLTC Provider Services branch with information on all  
18 physicians in the province who are funded by the Ministry. ICES receives information on  
19 demographics, specialty and practice location of physicians.  
20

#### 21 22 7. ICES Physician database (IPDB)

23 Data on all Ontario physicians by fiscal-year is contained within IPDB. Data contained in the IPDB  
24 includes physician demographics (gender, sex), specialty (functional and certified), location, and  
25 measures of physician activity (billings, workload, types or services provided). This data can be used  
26 for tasks including physician profiling, predicting physician behaviour, and measuring physician  
27 supply.  
28  
29

#### 30 31 8. The Druglist file (DIN)

32 DIN is a file housed at ICES which contains a near exhaustive list of DINs (Drug Identification Number)  
33 used in Canada from 1990 onwards. Drug and product names, subclass information, PCG codes, drug  
34 strength, route of administration and first and last dispensing dates from ODB are all contained in this  
35 file. We used DIN to create a druglist to apply as exclusion criteria and to use in exposure and  
36 outcome ascertainment.  
37  
38

#### 39 40 9. Institution Information System (INST)

41 INST is a series of datasets that contain information about Ontario health care institutions funded by  
42 the MOHLTC. We used INST to exclude patient hospitalizations that were not discharged from our  
43 hospitals of interest.  
44

#### 45 46 10. Ontario Hypertension dataset (HYPER)

47 HYPHER is an ICES-derived cohort which captures prevalent and incident cases of patients with  
48 hypertension in Ontario from 1991 onwards. ICES-derived cohorts are datasets, not disease registries,  
49 which have been developed in-house to identify individuals with specific diseases. Validation studies  
50 for these cohorts usually involve medical chart reviews, producing sensitivity, specificity, positive  
51 (PPV) and negative predictive values (NPV). For the HYPHER database cases of hypertension are  
52 identified with 72% sensitivity, 95% specificity, an 87% PPV and an 88% NPV.(5) We used HYPHER to  
53 measure hypertension as a patient characteristic.  
54  
55

#### 56 57 11. Ontario Chronic Obstructive Pulmonary Disease dataset (COPD)

1  
2 COPD is another ICES-derived cohort and captures prevalent and incident cases of patients in Ontario  
3 with Chronic Obstructive Pulmonary Disease (COPD) from 1991 onwards. The COPD sensitive cohort  
4 has an 85% sensitivity and 78.4% specificity, and the COPD specific cohort has as sensitivity of 57.5%  
5 and a specificity of 95.4%.(6) We used the COPD dataset to measure COPD as a patient characteristic.  
6  
7

#### 8 12. Ontario Rheumatoid Arthritis dataset (ORAD)

9 Prevalent and incident cases of patients >15 years old in Ontario with rheumatoid arthritis are  
10 identified in the ICES-derived dataset ORAD. Cases from 1991 onwards are captured in the dataset,  
11 and the dataset has a sensitivity of 78%, a specificity of 100%, a PPV of 78% and an NPV of 100%.(7)  
12 We used ORAD to measure arthritis as a patient characteristic.  
13  
14

#### 15 13. Ontario Diabetes dataset (ODD)

16 ODD is another ICES-derived dataset, and it captures prevalent and incident cases of patients in  
17 Ontario with diabetes from 1991 onwards. Specifically, the dataset is made up of three cohorts-  
18 children/youth (<=18 years old), a sensitive cohort (19+) and a specific cohort (19+) with the case  
19 definitions being slightly different for each. The validation values for the children/youth cohort are as  
20 follows: 82.8% sensitivity, 98.9% specificity. The sensitive cohort (19+) has a sensitivity of 90.0%, a  
21 specificity of 97.7% and a PPV of 82.6% while the specific cohort (19+) has a sensitivity of 79.9%, a  
22 specificity of 99.1% and a PPV of 91.4%.(8) We used ODD to measure diabetes as a patient  
23 characteristic.  
24  
25  
26

### 27 **References**

- 28 1. Levy AR, O'Brien BJ, Sellors C, Grootendorst P, Willison D. Coding accuracy of administrative drug claims in the Ontario  
29 Drug Benefit database. *The Canadian journal of clinical pharmacology*. 2003;10(2):67–71.
- 30 2. Juurlink D, Croxford R, Chong A, Austin P, Tu J, Laupacis A. Canadian Institute for Health Information Discharge Abstract  
31 Database: A Validation Study. Institute for Clinical Evaluative Sciences; 2006. (Institute for Clinical Evaluative Sciences).
- 32 3. Raina P, Torrance-Rynard V, Wong M, Woodward C. Agreement between self-reported and routinely collected health-  
33 care utilization data among seniors. *Health services research*. 2002 Jun;37(3):751–74.
- 34 4. NACRS Data Elements 2018–2019. [https://www.cihi.ca/sites/default/files/document/nacrs-dataelements-2018-2019-  
35 en.pdf](https://www.cihi.ca/sites/default/files/document/nacrs-dataelements-2018-2019-en.pdf). 2011 Mar 23;1–7.
- 36 5. Tu K, Campbell NR, Chen Z-L, Cauch-Dudek KJ, McAlister FA. Accuracy of administrative databases in identifying patients  
37 with hypertension. *Open Medicine Peer-reviewed Indep Open-access J*. 2007;1(1):e18-26.
- 38 6. Gershon AS, Wang C, Guan J, Vasilevska-Ristovska J, Cicutto L, To T. Identifying Patients with Physician-Diagnosed  
39 Asthma in Health Administrative Databases. *Can Respir J*. 2009;16(6):183–8.
- 40 7. Widdifield J, Bombardier C, Bernatsky S, Paterson JM, Green D, Young J, et al. An administrative data validation study of  
41 the accuracy of algorithms for identifying rheumatoid arthritis: the influence of the reference standard on algorithm  
42 performance. *Bmc Musculoskelet Di*. 2014;15(1):216.
- 43 8. Hux JE, Ivis F, Flintoft V, Bica A. Diabetes in Ontario: determination of prevalence and incidence using a validated  
44 administrative data algorithm. *Diabetes care*. 2002 Mar;25(3):512–6.
- 45  
46  
47  
48  
49  
50  
51  
52  
53  
54  
55  
56  
57  
58  
59  
60

**Appendix 3.** Administrative definition used to define the covariates.

|                                              | Data sources         | Variable/Codes                                                                                                                                                                                                                                                                                                        |
|----------------------------------------------|----------------------|-----------------------------------------------------------------------------------------------------------------------------------------------------------------------------------------------------------------------------------------------------------------------------------------------------------------------|
| Charlson comorbidity score                   | CIHI-DAD             | Deyo, R., Cherkin, D. & Ciol, M. Adapting a clinical comorbidity index for use with ICD-9-CM administrative databases. <i>Journal of clinical epidemiology</i> <b>45</b> , 613–619 (1992).                                                                                                                            |
| Hospital los                                 | CIHI-DAD             | LOS variable                                                                                                                                                                                                                                                                                                          |
| Primary care visits in past year             | OHIP                 | OHIP feecode (A001, A003-A006, A008, A901, A905, A912, C912, K024, K025, Q525, W872, W912)<br>spec= '00'                                                                                                                                                                                                              |
| Specialist care visits in past year          | OHIP                 | spec= '13', '41', '47', '48', '60', '61', '07', '15', '16', '46', '18'                                                                                                                                                                                                                                                |
| Number of medications in previous year       | ODB                  |                                                                                                                                                                                                                                                                                                                       |
| ED to inpatient transfer                     | NACRS                | TO_TYPE='I' variable                                                                                                                                                                                                                                                                                                  |
| Age                                          | RPDB                 |                                                                                                                                                                                                                                                                                                                       |
| Sex                                          | RPDB                 |                                                                                                                                                                                                                                                                                                                       |
| SES(Income)                                  | RPDB                 | INCQUINT variable                                                                                                                                                                                                                                                                                                     |
| Long term care resident*                     | CCRS                 | RESIDENT_CODE and absence of DISCHARGE_FLAG_IND                                                                                                                                                                                                                                                                       |
| Prior COPD                                   | CIHI-DAD, OHIP, SDS  | INSTFTYP values=4, 9 variable                                                                                                                                                                                                                                                                                         |
| Prior diabetes                               | OHIP, CIHI-DAD, ODB  | COPD (ICES derived cohort, see data sources)                                                                                                                                                                                                                                                                          |
| Prior hypertension                           | OHIP, CIHI-DAD, SDS  | ODD (ICES derived cohort, see data sources)                                                                                                                                                                                                                                                                           |
| Prior ischemic heart disease**               | OHIP, CIHI-DAD, SDS  | HYPER (ICES derived cohort, see data sources)                                                                                                                                                                                                                                                                         |
| Prior liver disease**                        | CIHI-DAD/SDS         | ICD-10 (I20-I25); CCP(4802, 4803, 4809, 481); CCI (1IJ50, 1IJ57GQxx, 1IJ76); OHIP dx (410, 412, 413); OHIP feecode (R742, R743, Z434, G298)                                                                                                                                                                           |
| Prior inflammatory bowel disease**           | CIHI-DAD/NACRS, OHIP | Mild: ICD-10 (B180, B181, B182, B188, B189, K700-K703, K709, K713-K715, K717, K73, K74, K760, K762-K764, K768, K769, Z944)<br>Moderate/Severe: ICD-10 (I850, I859, I864, I982, K704, K711, K721, K729, K765, K766, K767)                                                                                              |
| Prior renal disease**                        | CIHI-DAD             | ICD 10 [(R849, R850, G323, G325, G326, G330, G331, G860, G333, G083, G091, G085, G295, G082, G090, G092, G093, G094, G861, G862, G863, G864, G865, G866, G294, G095, G096)***]; [E102, E112, E132, E142, I12, I13, N08, N18, N19)****]; CCP (51.95, 66.98)***; CCI (1PZ21HQBR, 1PZ21HPD4)***; OHIP dx (403, 585)****; |
| Prior arthritis                              | CIHI-DAD, OHIP       | ORAD (ICES derived cohort, see data sources)                                                                                                                                                                                                                                                                          |
| Prior stroke**                               | CIHI-DAD             | ICD 10 [G45 (excl. G45.4), H34.0, H34.1, I60 (excl. I60.8), I61, I63 (excl. I63.6), I64]                                                                                                                                                                                                                              |
| Prior cerebrovascular disease (not stroke)** | CIHI-DAD/SDS         | ICD 10 (G45, G46, H340, I60-I69)                                                                                                                                                                                                                                                                                      |
| Prior congestive heart failure**             | CIHI-DAD             | ICD 10 (I50), OHIP dx (428)                                                                                                                                                                                                                                                                                           |
| Discharged to nursing home                   | CIHI-DAD             | INSTTYPE variable                                                                                                                                                                                                                                                                                                     |
| ICU admission                                | CIHI-DAD             | SCU variable                                                                                                                                                                                                                                                                                                          |
| Polypharmacy at admission*****               | ODB                  |                                                                                                                                                                                                                                                                                                                       |

1  
2  
3  
4  
5  
6  
7  
8  
9  
10  
11  
12  
13  
14  
15  
16  
17  
18  
19  
20  
21  
22  
23  
24  
25  
26  
27  
28  
29  
30  
31  
32  
33  
34  
35  
36  
37  
38  
39  
40  
41  
42  
43  
44  
45  
46  
47  
48  
49  
50  
51  
52  
53  
54  
55  
56  
57  
58  
59  
60

---

|                                      |                |                                                                                                                                           |
|--------------------------------------|----------------|-------------------------------------------------------------------------------------------------------------------------------------------|
| Surgery/procedure performed          | CIHI-DAD       | PRCODE1-10 variable                                                                                                                       |
| Main diagnoses for patient admission | CIHI-DAD       | DX10CODE with dxtype=M                                                                                                                    |
| Prior dementia                       | CIHI-DAD, OHIP | ICD 10 (F000, F001, F002, F009, F010, F011, F012, F013, F018, F019, F020, F021, F022, F023, F024, F028, F03, F04); OHIP dx (290), spec 19 |

---

\*Long term care resident in 3 months prior to admission or admitted from a long-term care facility

\*\*Defined as per Griffith LE, Gruneir A, Fisher K, et al. Patterns of health service use in community living older adults with dementia and comorbid conditions: a population-based retrospective cohort study in Ontario, Canada. *BMC Geriatrics*. 2016;16(1):1-10. doi:10.1186/s12877-016-0351-x

\*\*\*With chronic dialysis

\*\*\*\*Without chronic dialysis

\*\*\*\*\*Defined as  $\geq 10$  prescription medications, as per Onder G, Liperoti R, Foebel A, et al. Polypharmacy and mortality among nursing home residents with advanced cognitive impairment: Results from the shelter study. *Journal of the American Medical Directors Association*. 2013;14(6):450.e7-450.e12. doi:10.1016/j.jamda.2013.03.014

Confidential

**Appendix 4.** Coding definitions used to exclude patients with potential appropriate indications for benzodiazepine, antipsychotic, or gastric acid suppressant medication.

| Covariate                                                        | Data sources               | Codes                                                                                                                                                                              |
|------------------------------------------------------------------|----------------------------|------------------------------------------------------------------------------------------------------------------------------------------------------------------------------------|
| Schizophrenia                                                    | NACRS or CIHI-DAD, or OHIP | ICD 10 (F062, F200, F201, F202, F203, F205, F206, F208, F209, F230, F231, F232)<br>OHIP dx (295, spec19)                                                                           |
| Major depressive disorder                                        | NACRS or CIHI-DAD or OHIP  | ICD 10 (F063, F321, F322, F323, F328, F329, F330, F331, F332, F333, F334, F338, F339)<br>OHIP dx (296, 300, 311, spec19)                                                           |
| Bipolar disorder                                                 | NACRS or CIHI-DAD or OHIP  | ICD 10 (F313, F314, F315, F310, F311, F312, F316, F317, F318, F319)<br>OHIP dx (296, spec19)                                                                                       |
| Anxiety disorder                                                 | NACRS or CIHI-DAD or OHIP  | ICD 10 (F064, F410, F411, F412, F413, F418, F419, F400, F401, F402, F408, F409)<br>OHIP dx (300, spec 19)                                                                          |
| Gastrointestinal bleeding                                        | NACRS or CIHI-DAD          | ICD 10 (K922)                                                                                                                                                                      |
| Gastroduodenal ulcer                                             | NACRS or CIHI-DAD or OHIP  | ICD 10 (K260, K261, K262, K263, K264, K265, K266, K267, K269)<br>OHIP dx (532)                                                                                                     |
| Gastroesophageal reflux                                          | NACRS or CIHI-DAD          | ICD 10 (K210, K219)                                                                                                                                                                |
| Dementia                                                         | NACRS or CIHI-DAD or OHIP  | ICD 10 (F000, F001, F002, F009, F010, F011, F012, F013, F018, F019, F020, F021, F022, F023, F024, F028, F03, F04)<br>OHIP dx (290, spec19)                                         |
| Esophagitis                                                      | NACRS or CIHI-DAD or OHIP  | ICD 10 (K20)<br>OHIP dx (530)                                                                                                                                                      |
| Gastrinoma                                                       | NACRS or CIHI-DAD          | ICD 10 (81531, 81533)                                                                                                                                                              |
| Mental and behavioural disorders due to substance use/withdrawal | NACRS or CIHI-DAD          | F100, F101, F102, F103, F104, F105, F106, F107, F108, F109, F130, F131, F132, F133, F134, F135, F136, F137, F138, F139, F190, F191, F192, F193, F194, F195, F196, F197, F198, F199 |
| Psychotic disorders                                              | NACRS or CIHI-DAD or OHIP  | ICD 10 (F230, F231, F232, F233, F238, F239, F28, F29)<br>OHIP dx (298)                                                                                                             |
| Induced delusional disorders                                     | NACRS or CIHI-DAD          | ICD 10 (F24)                                                                                                                                                                       |
| Schizoaffective disorders                                        | NACRS or CIHI-DAD          | ICD 10 (F250, F251, F252, F258, F259)                                                                                                                                              |
| Obsessive compulsive disorders                                   | NACRS or CIHI-DAD or OHIP  | ICD 10 (F420, F421, F422, F428, F429)<br>OHIP dx (300)                                                                                                                             |
| Reaction to severe stress and adjustment disorders               | NACRS or CIHI-DAD or OHIP  | ICD 10 (F430, F431, F432, F438, F439)<br>OHIP dx (309)                                                                                                                             |
| Dissociative disorders                                           | NACRS or CIHI-DAD          | ICD 10 (F440, F441, F442, F443, F444, F445, F446, F447, F448, F449)                                                                                                                |
| Somatiform disorders                                             | NACRS or CIHI-DAD          | ICD 10 (F450, F451, F452, F453, F454, F458, F459)                                                                                                                                  |

1  
2  
3  
4  
5  
6  
7  
8  
9  
10  
11  
12  
13  
14  
15  
16  
17  
18  
19  
20  
21  
22  
23  
24  
25  
26  
27  
28  
29  
30  
31  
32  
33  
34  
35  
36  
37  
38  
39  
40  
41  
42  
43  
44  
45  
46  
47  
48  
49  
50  
51  
52  
53  
54  
55  
56  
57  
58  
59  
60

---

|                          |                   |                                 |
|--------------------------|-------------------|---------------------------------|
| Other neurotic disorders | NACRS or CIHI-DAD | ICD 10 (F480, F481, F488, F489) |
| Delirium                 | NACRS or CIHI-DAD | ICD 10 (F050, F051, F059)       |
| Other mental disorders   | NACRS or CIHI-DAD | ICD 10 (F060)                   |

---

Confidential



**Appendix 5.** Prescription medication names and Drug Identification Numbers (DINs) used to define the three medication groups of interest (antipsychotics, benzodiazepines and gastric acid suppressants).

| Antipsychotics             |          | Benzodiazepines |          | Gastric acid suppressants    |          |
|----------------------------|----------|-----------------|----------|------------------------------|----------|
| AA-CLOZAPINE               | 02248034 | ALPRAZOLAM      | 02400111 | BISMUTH CITRATE & RANITIDINE | 02231831 |
| AA-CLOZAPINE               | 02248035 | ALPRAZOLAM      | 02230074 | CIMETIDINE                   | 02227436 |
| AA-CLOZAPINE               | 02458748 | ALPRAZOLAM      | 01913239 | CIMETIDINE                   | 01916793 |
| AA-CLOZAPINE               | 02458756 | ALPRAZOLAM      | 02137534 | CIMETIDINE                   | 00865796 |
| ABBOTT-OLANZAPINE ODT      | 02414538 | ALPRAZOLAM      | 00865397 | CIMETIDINE                   | 00563560 |
| ABBOTT-OLANZAPINE ODT      | 02414546 | ALPRAZOLAM      | 01913484 | CIMETIDINE                   | 00546232 |
| ABBOTT-OLANZAPINE ODT      | 02414554 | ALPRAZOLAM      | 00548359 | CIMETIDINE                   | 00584215 |
| ACCEL-OLANZAPINE           | 02420538 | ALPRAZOLAM      | 00677485 | CIMETIDINE                   | 00582409 |
| ACCEL-OLANZAPINE           | 02420546 | ALPRAZOLAM      | 02417634 | CIMETIDINE                   | 02229717 |
| ACCEL-OLANZAPINE           | 02420554 | ALPRAZOLAM      | 02400138 | CIMETIDINE                   | 02229718 |
| ACCEL-OLANZAPINE           | 02420562 | ALPRAZOLAM      | 02349205 | CIMETIDINE                   | 00487872 |
| ACCEL-OLANZAPINE           | 02420570 | ALPRAZOLAM      | 02230075 | CIMETIDINE                   | 00397474 |
| ACCEL-OLANZAPINE           | 02420589 | ALPRAZOLAM      | 00677477 | CIMETIDINE                   | 00582417 |
| ACH-QUETIAPINE FUMARATE XR | 02450860 | ALPRAZOLAM      | 00548367 | CIMETIDINE                   | 00546240 |
| ACH-QUETIAPINE FUMARATE XR | 02450879 | ALPRAZOLAM      | 01913492 | CIMETIDINE                   | 02227444 |
| ACH-QUETIAPINE FUMARATE XR | 02450887 | ALPRAZOLAM      | 02137542 | CIMETIDINE                   | 01916815 |
| ACH-QUETIAPINE FUMARATE XR | 02450895 | ALPRAZOLAM      | 01913247 | CIMETIDINE                   | 00865818 |
| ACH-QUETIAPINE FUMARATE XR | 02450909 | ALPRAZOLAM      | 00865400 | CIMETIDINE                   | 02227452 |
| ACT OLANZAPINE             | 02325659 | ALPRAZOLAM      | 02417642 | CIMETIDINE                   | 01916785 |
| ACT OLANZAPINE             | 02325667 | ALPRAZOLAM      | 00813958 | CIMETIDINE                   | 00865826 |
| ACT OLANZAPINE             | 02325675 | ALPRAZOLAM      | 00723770 | CIMETIDINE                   | 00568449 |
| ACT OLANZAPINE             | 02325683 | ALPRAZOLAM      | 00913484 | CIMETIDINE                   | 00603678 |
| ACT OLANZAPINE             | 02325691 | ALPRAZOLAM      | 00913492 | CIMETIDINE                   | 00600059 |
| ACT OLANZAPINE             | 02325713 | ALPRAZOLAM      | 01908170 | CIMETIDINE                   | 00563579 |
| ACT OLANZAPINE ODT         | 02327562 | ALPRAZOLAM      | 01908189 | CIMETIDINE                   | 02229719 |
| ACT OLANZAPINE ODT         | 02327570 | ALPRAZOLAM      | 02018179 | CIMETIDINE                   | 02229720 |
| ACT OLANZAPINE ODT         | 02327589 | ALPRAZOLAM      | 02018187 | CIMETIDINE                   | 00563587 |
| ACT OLANZAPINE ODT         | 02327597 | ALPRAZOLAM      | 02083418 | CIMETIDINE                   | 00603686 |
| ACT RISPERIDONE            | 02282585 | ALPRAZOLAM      | 02083426 | CIMETIDINE                   | 00600067 |
| ACT RISPERIDONE            | 02282593 | ALPRAZOLAM      | 02147572 | CIMETIDINE                   | 00584282 |
| ACT RISPERIDONE            | 02282607 | ALPRAZOLAM      | 02147580 | CIMETIDINE                   | 01916777 |
| ACT RISPERIDONE            | 02282615 | ALPRAZOLAM      | 02228858 | CIMETIDINE                   | 02227460 |
| ACT RISPERIDONE            | 02282623 | ALPRAZOLAM      | 02228866 | CIMETIDINE                   | 00865834 |
| ACT RISPERIDONE            | 02282631 | ALPRAZOLAM      | 02229813 | CIMETIDINE                   | 00749494 |
| AG-OLANZAPINE FC           | 02487608 | ALPRAZOLAM      | 02229814 | CIMETIDINE                   | 01916769 |
| AG-OLANZAPINE FC           | 02487616 | ALPRAZOLAM      | 02230744 | CIMETIDINE                   | 00663727 |
| AG-OLANZAPINE FC           | 02487624 | ALPRAZOLAM      | 02230745 | CIMETIDINE                   | 00618616 |
| AG-OLANZAPINE FC           | 02487632 | ALPRAZOLAM      | 02237264 | CIMETIDINE                   | 00653411 |

1  
2  
3  
4  
5  
6  
7  
8  
9  
10  
11  
12  
13  
14  
15  
16  
17  
18  
19  
20  
21  
22  
23  
24  
25  
26  
27  
28  
29  
30  
31  
32  
33  
34  
35  
36  
37  
38  
39  
40  
41  
42  
43  
44  
45  
46  
47  
48  
49  
50  
51  
52  
53  
54  
55  
56  
57  
58  
59  
60

|                               |          |            |          |            |          |
|-------------------------------|----------|------------|----------|------------|----------|
| AG-OLANZAPINE FC              | 02487640 | ALPRAZOLAM | 02237265 | CIMETIDINE | 02229721 |
| AG-OLANZAPINE FC              | 02487659 | ALPRAZOLAM | 02237266 | CIMETIDINE | 00486876 |
| AG-OLANZAPINE ODT             | 02487667 | ALPRAZOLAM | 02237267 | CIMETIDINE | 00596469 |
| AG-OLANZAPINE ODT             | 02487675 | ALPRAZOLAM | 02242107 | CIMETIDINE | 00596477 |
| AG-OLANZAPINE ODT             | 02487683 | ALPRAZOLAM | 02242108 | CIMETIDINE | 00616230 |
| AG-OLANZAPINE ODT             | 02487691 | ALPRAZOLAM | 02243611 | CIMETIDINE | 00618691 |
| AG-RISPERIDONE                | 02369079 | ALPRAZOLAM | 02243612 | CIMETIDINE | 00618705 |
| AG-RISPERIDONE                | 02369087 | ALPRAZOLAM | 02248706 | CIMETIDINE | 00639893 |
| AG-RISPERIDONE                | 02369095 | ALPRAZOLAM | 02248707 | CIMETIDINE | 00639907 |
| AG-RISPERIDONE                | 02369117 | ALPRAZOLAM | 02282727 | CIMETIDINE | 00639915 |
| AG-RISPERIDONE                | 02369125 | ALPRAZOLAM | 02287315 | CIMETIDINE | 00644277 |
| AG-RISPERIDONE                | 02369133 | ALPRAZOLAM | 02287323 | CIMETIDINE | 00644285 |
| AMISULPRIDE                   | 09900065 | ALPRAZOLAM | 02287331 | CIMETIDINE | 00749454 |
| AMISULPRIDE                   | 92099811 | ALPRAZOLAM | 02346990 | CIMETIDINE | 00811610 |
| APO CHLORPROMAZINE            | 00312673 | ALPRAZOLAM | 02347008 | CIMETIDINE | 00811629 |
| APO CHLORPROMAZINE            | 00312681 | ALPRAZOLAM | 02349191 | CIMETIDINE | 00811637 |
| APO CHLORPROMAZINE            | 00312703 | ALPRAZOLAM | 02400146 | CIMETIDINE | 00901390 |
| APO HALOPERIDOL LIQ 2MG/ML    | 00587702 | ALPRAZOLAM | 02400154 | CIMETIDINE | 00916815 |
| APO HALOPERIDOL TAB 0.5MG     | 00396796 | ALPRAZOLAM | 02404877 | CIMETIDINE | 02227479 |
| APO HALOPERIDOL TAB 1MG       | 00396818 | ALPRAZOLAM | 02404885 | CIMETIDINE | 02231285 |
| APO-ARIPRAZOLE                | 02471086 | ALPRAZOLAM | 02404893 | CIMETIDINE | 02231287 |
| APO-ARIPRAZOLE                | 02471094 | ALPRAZOLAM | 02404907 | CIMETIDINE | 02231288 |
| APO-ARIPRAZOLE                | 02471108 | ALPRAZOLAM | 02417650 | CIMETIDINE | 02231290 |
| APO-ARIPRAZOLE                | 02471116 | ALPRAZOLAM | 02417669 | CIMETIDINE | 02231291 |
| APO-ARIPRAZOLE                | 02471124 | ALPRAZOLAM | 02248706 | CIMETIDINE | 02237010 |
| APO-ARIPRAZOLE                | 02471132 | ALPRAZOLAM | 02349191 | CIMETIDINE | 02237412 |
| APO-HALOPERIDOL LA INJECTABLE | 02242361 | ALPRAZOLAM | 02349205 | CIMETIDINE | 02237619 |
| APO-HALOPERIDOL LA INJECTABLE | 02242362 | ALPRAZOLAM | 02434601 | CIMETIDINE | 02238161 |
| APO-HALOPERIDOL TAB 10MG      | 00463698 | ALPRAZOLAM | 02434628 | CIMETIDINE | 02238257 |
| APO-HALOPERIDOL TAB 2MG       | 00396826 | ALPRAZOLAM | 02434636 | CIMETIDINE | 99101253 |
| APO-HALOPERIDOL TAB 5MG       | 00396834 | ALPRAZOLAM | 02434644 | CIMETIDINE | 99101285 |
| APO-LOXAPINE                  | 02237651 | ALPRAZOLAM | 02230074 | CIMETIDINE | 99101291 |
| APO-LOXAPINE                  | 02237652 | ALPRAZOLAM | 02230075 | CIMETIDINE | 99101301 |
| APO-LOXAPINE                  | 02237653 | ALPRAZOLAM | 02248707 | CIMETIDINE | 00487872 |
| APO-LOXAPINE                  | 02237654 | ALPRAZOLAM | 01908189 | CIMETIDINE | 00584215 |
| APO-OLANZAPINE                | 02281791 | ALPRAZOLAM | 01908170 | CIMETIDINE | 00600059 |
| APO-OLANZAPINE                | 02281805 | ALPRAZOLAM | 02397021 | CIMETIDINE | 00600067 |
| APO-OLANZAPINE                | 02281813 | ALPRAZOLAM | 02397048 | CIMETIDINE | 00749494 |
| APO-OLANZAPINE                | 02281821 | ALPRAZOLAM | 02397056 | CIMETIDINE | 00596469 |
| APO-OLANZAPINE                | 02281848 | ALPRAZOLAM | 02397064 | CIMETIDINE | 00596477 |
| APO-OLANZAPINE                | 02333015 | ALPRAZOLAM | 02400111 | CIMETIDINE | 00618691 |
| APO-OLANZAPINE ODT            | 02360616 | ALPRAZOLAM | 02400138 | CIMETIDINE | 00618705 |
| APO-OLANZAPINE ODT            | 02360624 | ALPRAZOLAM | 02400146 | CIMETIDINE | 02231285 |

|    |                    |          |            |          |                             |          |
|----|--------------------|----------|------------|----------|-----------------------------|----------|
| 1  |                    |          |            |          |                             |          |
| 2  |                    |          |            |          |                             |          |
| 3  |                    |          |            |          |                             |          |
| 4  |                    |          |            |          |                             |          |
| 5  |                    |          |            |          |                             |          |
| 6  |                    |          |            |          |                             |          |
| 7  |                    |          |            |          |                             |          |
| 8  |                    |          |            |          |                             |          |
| 9  |                    |          |            |          |                             |          |
| 10 |                    |          |            |          |                             |          |
| 11 |                    |          |            |          |                             |          |
| 12 |                    |          |            |          |                             |          |
| 13 |                    |          |            |          |                             |          |
| 14 |                    |          |            |          |                             |          |
| 15 |                    |          |            |          |                             |          |
| 16 |                    |          |            |          |                             |          |
| 17 |                    |          |            |          |                             |          |
| 18 |                    |          |            |          |                             |          |
| 19 |                    |          |            |          |                             |          |
| 20 |                    |          |            |          |                             |          |
| 21 |                    |          |            |          |                             |          |
| 22 |                    |          |            |          |                             |          |
| 23 |                    |          |            |          |                             |          |
| 24 |                    |          |            |          |                             |          |
| 25 |                    |          |            |          |                             |          |
| 26 |                    |          |            |          |                             |          |
| 27 |                    |          |            |          |                             |          |
| 28 |                    |          |            |          |                             |          |
| 29 |                    |          |            |          |                             |          |
| 30 |                    |          |            |          |                             |          |
| 31 |                    |          |            |          |                             |          |
| 32 |                    |          |            |          |                             |          |
| 33 |                    |          |            |          |                             |          |
| 34 |                    |          |            |          |                             |          |
| 35 |                    |          |            |          |                             |          |
| 36 |                    |          |            |          |                             |          |
| 37 |                    |          |            |          |                             |          |
| 38 |                    |          |            |          |                             |          |
| 39 |                    |          |            |          |                             |          |
| 40 |                    |          |            |          |                             |          |
| 41 |                    |          |            |          |                             |          |
| 42 |                    |          |            |          |                             |          |
| 43 |                    |          |            |          |                             |          |
| 44 |                    |          |            |          |                             |          |
| 45 |                    |          |            |          |                             |          |
| 46 |                    |          |            |          |                             |          |
| 47 |                    |          |            |          |                             |          |
| 48 |                    |          |            |          |                             |          |
| 49 |                    |          |            |          |                             |          |
| 50 |                    |          |            |          |                             |          |
| 51 |                    |          |            |          |                             |          |
| 52 |                    |          |            |          |                             |          |
| 53 |                    |          |            |          |                             |          |
| 54 |                    |          |            |          |                             |          |
| 55 |                    |          |            |          |                             |          |
| 56 |                    |          |            |          |                             |          |
| 57 |                    |          |            |          |                             |          |
| 58 |                    |          |            |          |                             |          |
| 59 |                    |          |            |          |                             |          |
| 60 |                    |          |            |          |                             |          |
|    | APO-OLANZAPINE ODT | 02360632 | ALPRAZOLAM | 02400154 | CIMETIDINE                  | 02231287 |
|    | APO-OLANZAPINE ODT | 02360640 | ALPRAZOLAM | 02137534 | CIMETIDINE                  | 02231288 |
|    | APO-RISPERIDONE    | 02280396 | ALPRAZOLAM | 02137542 | CIMETIDINE                  | 02231290 |
|    | APO-RISPERIDONE    | 02282119 | ALPRAZOLAM | 02229813 | CIMETIDINE                  | 02231291 |
|    | APO-RISPERIDONE    | 02282127 | ALPRAZOLAM | 02229814 | CIMETIDINE                  | 02227436 |
|    | APO-RISPERIDONE    | 02282135 | ALPRAZOLAM | 02417634 | CIMETIDINE                  | 02227444 |
|    | APO-RISPERIDONE    | 02282143 | ALPRAZOLAM | 02417642 | CIMETIDINE                  | 02227452 |
|    | APO-RISPERIDONE    | 02282151 | ALPRAZOLAM | 02417650 | CIMETIDINE                  | 02227460 |
|    | APO-RISPERIDONE    | 02282178 | ALPRAZOLAM | 02417669 | CIMETIDINE                  | 02227479 |
|    | ARIPIPIRAZOLE      | 02473674 | ALPRAZOLAM | 02346990 | CIMETIDINE                  | 02229717 |
|    | ARIPIPIRAZOLE      | 02322390 | ALPRAZOLAM | 02347008 | CIMETIDINE                  | 02229718 |
|    | ARIPIPIRAZOLE      | 02466651 | ALPRAZOLAM | 00677477 | CIMETIDINE                  | 02229719 |
|    | ARIPIPIRAZOLE      | 02460041 | ALPRAZOLAM | 00677485 | CIMETIDINE                  | 02229720 |
|    | ARIPIPIRAZOLE      | 02471108 | ALPRAZOLAM | 02404877 | CIMETIDINE                  | 02229721 |
|    | ARIPIPIRAZOLE      | 02473682 | ALPRAZOLAM | 02404885 | CIMETIDINE                  | 02237619 |
|    | ARIPIPIRAZOLE      | 02322404 | ALPRAZOLAM | 02404893 | CIMETIDINE                  | 02237010 |
|    | ARIPIPIRAZOLE      | 02460068 | ALPRAZOLAM | 02404907 | CIMETIDINE                  | 02238161 |
|    | ARIPIPIRAZOLE      | 02471116 | ALPRAZOLAM | 02242107 | CIMETIDINE                  | 00582409 |
|    | ARIPIPIRAZOLE      | 02473690 | ALPRAZOLAM | 02242108 | CIMETIDINE                  | 00582417 |
|    | ARIPIPIRAZOLE      | 02471124 | ALPRAZOLAM | 01913484 | CIMETIDINE                  | 00603678 |
|    | ARIPIPIRAZOLE      | 02466686 | ALPRAZOLAM | 01913492 | CIMETIDINE                  | 00603686 |
|    | ARIPIPIRAZOLE      | 02322412 | BROMAZEPAM | 00682314 | CIMETIDINE                  | 00663727 |
|    | ARIPIPIRAZOLE      | 02460076 | BROMAZEPAM | 02177153 | CIMETIDINE                  | 00865796 |
|    | ARIPIPIRAZOLE      | 02322374 | BROMAZEPAM | 02171856 | CIMETIDINE                  | 00865818 |
|    | ARIPIPIRAZOLE      | 02466635 | BROMAZEPAM | 02192705 | CIMETIDINE                  | 00865826 |
|    | ARIPIPIRAZOLE      | 02473658 | BROMAZEPAM | 02167808 | CIMETIDINE                  | 00865834 |
|    | ARIPIPIRAZOLE      | 02460025 | BROMAZEPAM | 02167816 | CIMETIDINE                  | 00546232 |
|    | ARIPIPIRAZOLE      | 02471086 | BROMAZEPAM | 02171864 | CIMETIDINE                  | 00546240 |
|    | ARIPIPIRAZOLE      | 02420864 | BROMAZEPAM | 02177161 | CIMETIDINE                  | 00568449 |
|    | ARIPIPIRAZOLE      | 02471132 | BROMAZEPAM | 02192713 | CIMETIDINE                  | 00584282 |
|    | ARIPIPIRAZOLE      | 02466694 | BROMAZEPAM | 00518123 | CIMETIDINE                  | 00618616 |
|    | ARIPIPIRAZOLE      | 02322455 | BROMAZEPAM | 02230584 | CIMETIDINE                  | 01916815 |
|    | ARIPIPIRAZOLE      | 02473704 | BROMAZEPAM | 02230585 | CIMETIDINE                  | 01916785 |
|    | ARIPIPIRAZOLE      | 02420872 | BROMAZEPAM | 00518131 | CIMETIDINE                  | 01916777 |
|    | ARIPIPIRAZOLE      | 02473666 | BROMAZEPAM | 02177188 | CIMETIDINE (CIMETIDINE HCL) | 02243085 |
|    | ARIPIPIRAZOLE      | 02466643 | BROMAZEPAM | 02167824 | CIMETIDINE (CIMETIDINE HCL) | 02209063 |
|    | ARIPIPIRAZOLE      | 02471094 | BROMAZEPAM | 02171872 | CIMETIDINE (CIMETIDINE HCL) | 01916807 |
|    | ARIPIPIRAZOLE      | 02322382 | BROMAZEPAM | 02192721 | CIMETIDINE (CIMETIDINE HCL) | 00397482 |
|    | ARIPIPIRAZOLE      | 02460033 | BROMAZEPAM | 02220512 | CIMETIDINE (CIMETIDINE HCL) | 01916750 |
|    | ARIPIPIRAZOLE      | 00900425 | BROMAZEPAM | 02220520 | CIMETIDINE HCL              | 02243085 |
|    | ARIPIPIRAZOLE      | 00965529 | BROMAZEPAM | 02220539 | CIMETIDINE HCL              | 00397482 |
|    | ARIPIPIRAZOLE      | 02460084 | BROMAZEPAM | 02228874 | CIMETIDINE HCL              | 01916750 |
|    | ARIPIPIRAZOLE      | 02464144 | BROMAZEPAM | 02228882 | CIMETIDINE HCL              | 00397490 |

1  
2  
3  
4  
5  
6  
7  
8  
9  
10  
11  
12  
13  
14  
15  
16  
17  
18  
19  
20  
21  
22  
23  
24  
25  
26  
27  
28  
29  
30  
31  
32  
33  
34  
35  
36  
37  
38  
39  
40  
41  
42  
43  
44  
45  
46  
47  
48  
49  
50  
51  
52  
53  
54  
55  
56  
57  
58  
59  
60

|                               |          |                      |          |                                                  |          |
|-------------------------------|----------|----------------------|----------|--------------------------------------------------|----------|
| ARIPRAZOLE                    | 02464152 | BROMAZEPAM           | 02228890 | CIMETIDINE HCL                                   | 00527076 |
| ARIPRAZOLE                    | 02464160 | BROMAZEPAM           | 02230039 | CIMETIDINE HCL                                   | 01916807 |
| ARIPRAZOLE                    | 02464179 | BROMAZEPAM           | 02230040 | CIMETIDINE HCL                                   | 02209063 |
| ARIPRAZOLE                    | 02464187 | BROMAZEPAM           | 02230041 | CIMETIDINE HCL                                   | 02240385 |
| ARIPRAZOLE                    | 02464195 | BROMAZEPAM           | 02230666 | CIMETIDINE HCL                                   | 01927280 |
| ARIPRAZOLE                    | 02466678 | BROMAZEPAM           | 02230667 | DEXLANSOPRAZOLE                                  | 02354696 |
| ARIPRAZOLE                    | 05751321 | BROMAZEPAM           | 02230668 | DEXLANSOPRAZOLE                                  | 02354950 |
| ARIPRAZOLE                    | 06612408 | BROMAZEPAM           | 02232556 | DEXLANSOPRAZOLE                                  | 02354969 |
| ARIPRAZOLE                    | 22123272 | BROMAZEPAM           | 02232558 | ESOMEPRAZOLE (ESOMEPRAZOLE MAGNESIUM DIHYDRATE)  | 02423855 |
| ARIPRAZOLE                    | 66124649 | BROMAZEPAM           | 02242152 | ESOMEPRAZOLE (ESOMEPRAZOLE MAGNESIUM DIHYDRATE)  | 02423863 |
| ARIPRAZOLE                    | 02488000 | BROMAZEPAM           | 02242153 | ESOMEPRAZOLE (ESOMEPRAZOLE MAGNESIUM DIHYDRATE)  | 02417480 |
| ARIPRAZOLE                    | 02488019 | BROMAZEPAM           | 99101489 | ESOMEPRAZOLE (ESOMEPRAZOLE MAGNESIUM DIHYDRATE)  | 02417499 |
| ARIPRAZOLE                    | 02488027 | BROMAZEPAM           | 99101490 | ESOMEPRAZOLE (ESOMEPRAZOLE MAGNESIUM DIHYDRATE)  | 02384329 |
| ARIPRAZOLE                    | 02488035 | BROMAZEPAM           | 02167808 | ESOMEPRAZOLE (ESOMEPRAZOLE MAGNESIUM DIHYDRATE)  | 02384337 |
| ARIPRAZOLE                    | 02488043 | BROMAZEPAM           | 02167816 | ESOMEPRAZOLE (ESOMEPRAZOLE MAGNESIUM DIHYDRATE)  | 02379163 |
| ARIPRAZOLE                    | 02488051 | BROMAZEPAM           | 02167824 | ESOMEPRAZOLE (ESOMEPRAZOLE MAGNESIUM DIHYDRATE)  | 02379171 |
| ASENAPINE                     | 02374811 | BROMAZEPAM           | 02177153 | ESOMEPRAZOLE (ESOMEPRAZOLE MAGNESIUM DIHYDRATE)  | 02386216 |
| ASENAPINE                     | 02374803 | BROMAZEPAM           | 02177161 | ESOMEPRAZOLE (ESOMEPRAZOLE MAGNESIUM DIHYDRATE)  | 02386224 |
| ASENAPINE (ASENAPINE MALEATE) | 02374803 | BROMAZEPAM           | 02177188 | ESOMEPRAZOLE (ESOMEPRAZOLE MAGNESIUM DIHYDRATE)  | 02460920 |
| ASENAPINE (ASENAPINE MALEATE) | 02374811 | BROMAZEPAM           | 02220512 | ESOMEPRAZOLE (ESOMEPRAZOLE MAGNESIUM DIHYDRATE)  | 02460939 |
| AURO-ARIPRAZOLE               | 02460025 | BROMAZEPAM           | 02220520 | ESOMEPRAZOLE (ESOMEPRAZOLE MAGNESIUM TRIHYDRATE) | 02449587 |
| AURO-ARIPRAZOLE               | 02460033 | BROMAZEPAM           | 02220539 | ESOMEPRAZOLE (ESOMEPRAZOLE MAGNESIUM TRIHYDRATE) | 02449595 |
| AURO-ARIPRAZOLE               | 02460041 | BROMAZEPAM           | 02192713 | ESOMEPRAZOLE (ESOMEPRAZOLE MAGNESIUM TRIHYDRATE) | 02479419 |
| AURO-ARIPRAZOLE               | 02460068 | BROMAZEPAM           | 02192721 | ESOMEPRAZOLE (ESOMEPRAZOLE MAGNESIUM TRIHYDRATE) | 02479427 |
| AURO-ARIPRAZOLE               | 02460076 | BROMAZEPAM           | 02192705 | ESOMEPRAZOLE (ESOMEPRAZOLE MAGNESIUM TRIHYDRATE) | 02383039 |
| AURO-ARIPRAZOLE               | 02460084 | BROMAZEPAM           | 02171856 | ESOMEPRAZOLE (ESOMEPRAZOLE MAGNESIUM TRIHYDRATE) | 02383047 |
| AURO-CLOZAPINE                | 02455161 | BROMAZEPAM           | 02171864 | ESOMEPRAZOLE (ESOMEPRAZOLE MAGNESIUM TRIHYDRATE) | 02300524 |
| AURO-CLOZAPINE                | 02455188 | BROMAZEPAM           | 02171872 | ESOMEPRAZOLE (ESOMEPRAZOLE MAGNESIUM TRIHYDRATE) | 02244521 |
| AURO-CLOZAPINE                | 02455196 | BROMAZEPAM           | 02232556 | ESOMEPRAZOLE (ESOMEPRAZOLE MAGNESIUM TRIHYDRATE) | 02244522 |
| AURO-CLOZAPINE                | 02455218 | BROMAZEPAM           | 02232558 | ESOMEPRAZOLE (ESOMEPRAZOLE MAGNESIUM TRIHYDRATE) | 02444712 |
| AURO-OLANZAPINE ODT           | 02448726 | BROMAZEPAM           | 02242152 | ESOMEPRAZOLE (ESOMEPRAZOLE MAGNESIUM)            | 02339099 |
| AURO-OLANZAPINE ODT           | 02448734 | BROMAZEPAM           | 02242153 | ESOMEPRAZOLE (ESOMEPRAZOLE MAGNESIUM)            | 02339102 |
| AURO-OLANZAPINE ODT           | 02448742 | BROMAZEPAM           | 02230584 | ESOMEPRAZOLE (ESOMEPRAZOLE MAGNESIUM)            | 02394839 |
| AURO-OLANZAPINE ODT           | 02448750 | BROMAZEPAM           | 02230585 | ESOMEPRAZOLE (ESOMEPRAZOLE MAGNESIUM)            | 02394847 |
| AVA-OLANZAPINE                | 02373432 | CHLORDIAZEPOXIDE     | 00522988 | ESOMEPRAZOLE (ESOMEPRAZOLE MAGNESIUM)            | 02431173 |
| AVA-OLANZAPINE                | 02373440 | CHLORDIAZEPOXIDE     | 00522996 | ESOMEPRAZOLE (ESOMEPRAZOLE MAGNESIUM)            | 02438461 |
| AVA-OLANZAPINE                | 02373459 | CHLORDIAZEPOXIDE     | 00522724 | ESOMEPRAZOLE (ESOMEPRAZOLE MAGNESIUM)            | 02438488 |
| AVA-OLANZAPINE                | 02373467 | CHLORDIAZEPOXIDE     | 00016764 | ESOMEPRAZOLE (ESOMEPRAZOLE MAGNESIUM)            | 02442493 |
| AVA-OLANZAPINE                | 02373475 | CHLORDIAZEPOXIDE     | 00430927 | ESOMEPRAZOLE (ESOMEPRAZOLE MAGNESIUM)            | 02442507 |
| AVA-RISPERIDONE               | 02364344 | CHLORDIAZEPOXIDE     | 00430935 | ESOMEPRAZOLE (ESOMEPRAZOLE MAGNESIUM)            | 02414392 |
| AVA-RISPERIDONE               | 02367173 | CHLORDIAZEPOXIDE     | 00448737 | ESOMEPRAZOLE (ESOMEPRAZOLE MAGNESIUM)            | 02414406 |
| AVA-RISPERIDONE               | 02367181 | CHLORDIAZEPOXIDE     | 00903688 | ESOMEPRAZOLE (ESOMEPRAZOLE MAGNESIUM)            | 02423979 |
| AVA-RISPERIDONE               | 02367203 | CHLORDIAZEPOXIDE HCL | 00013471 | ESOMEPRAZOLE (ESOMEPRAZOLE MAGNESIUM)            | 02423987 |

|    |                    |          |                                          |          |                        |          |
|----|--------------------|----------|------------------------------------------|----------|------------------------|----------|
| 1  |                    |          |                                          |          |                        |          |
| 2  |                    |          |                                          |          |                        |          |
| 3  |                    |          |                                          |          |                        |          |
| 4  |                    |          |                                          |          |                        |          |
| 5  |                    |          |                                          |          |                        |          |
| 6  |                    |          |                                          |          |                        |          |
| 7  |                    |          |                                          |          |                        |          |
| 8  |                    |          |                                          |          |                        |          |
| 9  |                    |          |                                          |          |                        |          |
| 10 |                    |          |                                          |          |                        |          |
| 11 |                    |          |                                          |          |                        |          |
| 12 |                    |          |                                          |          |                        |          |
| 13 |                    |          |                                          |          |                        |          |
| 14 |                    |          |                                          |          |                        |          |
| 15 |                    |          |                                          |          |                        |          |
| 16 |                    |          |                                          |          |                        |          |
| 17 |                    |          |                                          |          |                        |          |
| 18 |                    |          |                                          |          |                        |          |
| 19 |                    |          |                                          |          |                        |          |
| 20 |                    |          |                                          |          |                        |          |
| 21 |                    |          |                                          |          |                        |          |
| 22 |                    |          |                                          |          |                        |          |
| 23 |                    |          |                                          |          |                        |          |
| 24 |                    |          |                                          |          |                        |          |
| 25 |                    |          |                                          |          |                        |          |
| 26 |                    |          |                                          |          |                        |          |
| 27 |                    |          |                                          |          |                        |          |
| 28 |                    |          |                                          |          |                        |          |
| 29 |                    |          |                                          |          |                        |          |
| 30 |                    |          |                                          |          |                        |          |
| 31 |                    |          |                                          |          |                        |          |
| 32 |                    |          |                                          |          |                        |          |
| 33 |                    |          |                                          |          |                        |          |
| 34 |                    |          |                                          |          |                        |          |
| 35 |                    |          |                                          |          |                        |          |
| 36 |                    |          |                                          |          |                        |          |
| 37 |                    |          |                                          |          |                        |          |
| 38 |                    |          |                                          |          |                        |          |
| 39 |                    |          |                                          |          |                        |          |
| 40 |                    |          |                                          |          |                        |          |
| 41 |                    |          |                                          |          |                        |          |
| 42 |                    |          |                                          |          |                        |          |
| 43 |                    |          |                                          |          |                        |          |
| 44 |                    |          |                                          |          |                        |          |
| 45 |                    |          |                                          |          |                        |          |
| 46 |                    |          |                                          |          |                        |          |
| 47 |                    |          |                                          |          |                        |          |
| 48 |                    |          |                                          |          |                        |          |
| 49 |                    |          |                                          |          |                        |          |
| 50 |                    |          |                                          |          |                        |          |
| 51 |                    |          |                                          |          |                        |          |
| 52 |                    |          |                                          |          |                        |          |
| 53 |                    |          |                                          |          |                        |          |
| 54 |                    |          |                                          |          |                        |          |
| 55 |                    |          |                                          |          |                        |          |
| 56 |                    |          |                                          |          |                        |          |
| 57 |                    |          |                                          |          |                        |          |
| 58 |                    |          |                                          |          |                        |          |
| 59 |                    |          |                                          |          |                        |          |
| 60 |                    |          |                                          |          |                        |          |
|    | AVA-RISPERIDONE    | 02367211 | CHLORDIAZEPOXIDE HCL                     | 00020923 | ESOMEPRAZOLE MAGNESIUM | 02300524 |
|    | AVA-RISPERIDONE    | 02367238 | CHLORDIAZEPOXIDE HCL                     | 00012637 | ESOMEPRAZOLE MAGNESIUM | 02244522 |
|    | AVA-RISPERIDONE    | 02367246 | CHLORDIAZEPOXIDE HCL                     | 00398411 | ESOMEPRAZOLE MAGNESIUM | 02244521 |
|    | BUPROPION HCL      | 00001595 | CHLORDIAZEPOXIDE HCL                     | 00012645 | ESOMEPRAZOLE MAGNESIUM | 02339099 |
|    | BUPROPION HCL      | 22602390 | CHLORDIAZEPOXIDE HCL                     | 00020931 | ESOMEPRAZOLE MAGNESIUM | 02339102 |
|    | BUPROPION HCL SR   | 02385694 | CHLORDIAZEPOXIDE HCL                     | 00398438 | ESOMEPRAZOLE MAGNESIUM | 02379171 |
|    | BUPROPION HCL XL   | 02383187 | CHLORDIAZEPOXIDE HCL                     | 00013498 | ESOMEPRAZOLE MAGNESIUM | 02383039 |
|    | BUPROPION HCL XL   | 02383195 | CHLORDIAZEPOXIDE HCL                     | 00295051 | ESOMEPRAZOLE MAGNESIUM | 02383047 |
|    | CHLORMEZANONE      | 00033626 | CHLORDIAZEPOXIDE HCL                     | 00398403 | ESOMEPRAZOLE MAGNESIUM | 02394839 |
|    | CHLORPROMAZINE     | 01930001 | CHLORDIAZEPOXIDE HCL                     | 00013463 | ESOMEPRAZOLE MAGNESIUM | 02394847 |
|    | CHLORPROMAZINE     | 00025283 | CHLORDIAZEPOXIDE HCL                     | 00020915 | ESOMEPRAZOLE MAGNESIUM | 02423855 |
|    | CHLORPROMAZINE     | 00025186 | CHLORDIAZEPOXIDE HCL                     | 00012629 | ESOMEPRAZOLE MAGNESIUM | 02423863 |
|    | CHLORPROMAZINE     | 00025151 | CHLORDIAZEPOXIDE HCL                     | 00012815 | ESOMEPRAZOLE MAGNESIUM | 02423979 |
|    | CHLORPROMAZINE     | 01929968 | CHLORDIAZEPOXIDE HCL                     | 00016756 | ESOMEPRAZOLE MAGNESIUM | 02423987 |
|    | CHLORPROMAZINE     | 00025275 | CHLORDIAZEPOXIDE HCL                     | 00022020 | ESOMEPRAZOLE MAGNESIUM | 02431173 |
|    | CHLORPROMAZINE HCL | 01929933 | CHLORDIAZEPOXIDE HCL                     | 00134325 | ESOMEPRAZOLE MAGNESIUM | 02442493 |
|    | CHLORPROMAZINE HCL | 00232831 | CHLORDIAZEPOXIDE HCL                     | 00134333 | ESOMEPRAZOLE MAGNESIUM | 02442507 |
|    | CHLORPROMAZINE HCL | 00025496 | CHLORDIAZEPOXIDE HCL                     | 00156590 | ESOMEPRAZOLE MAGNESIUM | 02444712 |
|    | CHLORPROMAZINE HCL | 00025178 | CHLORDIAZEPOXIDE HCL                     | 00210064 | ESOMEPRAZOLE MAGNESIUM | 02460920 |
|    | CHLORPROMAZINE HCL | 01929976 | CHLORDIAZEPOXIDE HCL                     | 00235873 | ESOMEPRAZOLE MAGNESIUM | 02460939 |
|    | CHLORPROMAZINE HCL | 01929909 | CHLORDIAZEPOXIDE HCL                     | 00251259 | ESOMEPRAZOLE MAGNESIUM | 82244522 |
|    | CHLORPROMAZINE HCL | 00025453 | CHLORDIAZEPOXIDE HCL                     | 00251267 | EXTEMPORANEOUS MIXTURE | 99503002 |
|    | CHLORPROMAZINE HCL | 00232157 | CHLORDIAZEPOXIDE HCL                     | 00267090 | FAMOTIDINE             | 00728128 |
|    | CHLORPROMAZINE HCL | 00025518 | CHLORDIAZEPOXIDE HCL                     | 00301558 | FAMOTIDINE             | 01953842 |
|    | CHLORPROMAZINE HCL | 01929941 | CHLORDIAZEPOXIDE HCL                     | 00314471 | FAMOTIDINE             | 02024195 |
|    | CHLORPROMAZINE HCL | 00580988 | CHLORDIAZEPOXIDE HCL                     | 00314498 | FAMOTIDINE             | 02022133 |
|    | CHLORPROMAZINE HCL | 00025461 | CHLORDIAZEPOXIDE HCL                     | 00314528 | FAMOTIDINE             | 02196018 |
|    | CHLORPROMAZINE HCL | 00232823 | CHLORDIAZEPOXIDE HCL                     | 00324418 | FAMOTIDINE             | 00710121 |
|    | CHLORPROMAZINE HCL | 01929917 | CHLORDIAZEPOXIDE HCL                     | 00363596 | FAMOTIDINE             | 02237148 |
|    | CHLORPROMAZINE HCL | 01929992 | CHLORDIAZEPOXIDE HCL                     | 00379913 | FAMOTIDINE             | 02240622 |
|    | CHLORPROMAZINE HCL | 01929984 | CHLORDIAZEPOXIDE HCL                     | 00434426 | FAMOTIDINE             | 02242327 |
|    | CHLORPROMAZINE HCL | 00163953 | CHLORDIAZEPOXIDE HCL                     | 00440183 | FAMOTIDINE             | 02351102 |
|    | CHLORPROMAZINE HCL | 00025488 | CHLORDIAZEPOXIDE HCL                     | 00451479 | FAMOTIDINE             | 02351110 |
|    | CHLORPROMAZINE HCL | 00232807 | CHLORDIAZEPOXIDE HCL                     | 00451487 | FAMOTIDINE             | 02237149 |
|    | CHLORPROMAZINE HCL | 01929925 | CHLORDIAZEPOXIDE HCL                     | 00451495 | FAMOTIDINE             | 02242328 |
|    | CHLORPROMAZINE HCL | 00016993 | CHLORDIAZEPOXIDE HCL                     | 00502626 | FAMOTIDINE             | 02240623 |
|    | CHLORPROMAZINE HCL | 00017000 | CHLORDIAZEPOXIDE HCL                     | 99101299 | FAMOTIDINE             | 00710113 |
|    | CHLORPROMAZINE HCL | 00017019 | CHLORDIAZEPOXIDE HCL                     | 99101354 | FAMOTIDINE             | 02022141 |
|    | CHLORPROMAZINE HCL | 00017027 | CHLORDIAZEPOXIDE HCL & CLIDINIUM BROMIDE | 00618454 | FAMOTIDINE             | 02024209 |
|    | CHLORPROMAZINE HCL | 00021318 | CHLORDIAZEPOXIDE HCL & CLIDINIUM HCL     | 00115630 | FAMOTIDINE             | 01953834 |
|    | CHLORPROMAZINE HCL | 00021326 | CHLORDIAZEPOXIDE HCL & CLIDINIUM HCL     | 00391077 | FAMOTIDINE             | 02196026 |
|    | CHLORPROMAZINE HCL | 00021334 | CHLORDIAZEPOXIDE HCL & CLIDINIUM HCL     | 00636223 | FAMOTIDINE             | 00728101 |
|    | CHLORPROMAZINE HCL | 00021342 | CHLORDIAZEPOXIDE HCL & CLIDINIUM HCL     | 00807516 | FAMOTIDINE             | 01953824 |

1  
2  
3  
4  
5  
6  
7  
8  
9  
10  
11  
12  
13  
14  
15  
16  
17  
18  
19  
20  
21  
22  
23  
24  
25  
26  
27  
28  
29  
30  
31  
32  
33  
34  
35  
36  
37  
38  
39  
40  
41  
42  
43  
44  
45  
46  
47  
48  
49  
50  
51  
52  
53  
54  
55  
56  
57  
58  
59  
60

|                                    |          |                      |          |            |          |
|------------------------------------|----------|----------------------|----------|------------|----------|
| CHLORPROMAZINE HCL                 | 00131725 | CHLORDIAZEPOXIDE HCL | 00522724 | FAMOTIDINE | 02100541 |
| CHLORPROMAZINE HCL                 | 00163988 | CHLORDIAZEPOXIDE HCL | 00522988 | FAMOTIDINE | 02100568 |
| CHLORPROMAZINE HCL                 | 00164003 | CHLORDIAZEPOXIDE HCL | 00522996 | FAMOTIDINE | 02185911 |
| CHLORPROMAZINE HCL                 | 00209902 | CHLORDIAZEPOXIDE HCL | 00156590 | FAMOTIDINE | 02185938 |
| CHLORPROMAZINE HCL                 | 00209910 | CHLORDIAZEPOXIDE HCL | 00363596 | FAMOTIDINE | 02229995 |
| CHLORPROMAZINE HCL                 | 00210684 | CHLORDIAZEPOXIDE HCL | 00618454 | FAMOTIDINE | 02229996 |
| CHLORPROMAZINE HCL                 | 00249394 | CHLORDIAZEPOXIDE HCL | 00448737 | FAMOTIDINE | 02231104 |
| CHLORPROMAZINE HCL                 | 00271101 | CHLORDIAZEPOXIDE HCL | 00430935 | FAMOTIDINE | 02231119 |
| CHLORPROMAZINE HCL                 | 00271128 | CHLORDIAZEPOXIDE HCL | 00434426 | FAMOTIDINE | 02231400 |
| CHLORPROMAZINE HCL                 | 00295086 | CHLORDIAZEPOXIDE HCL | 00235873 | FAMOTIDINE | 02231567 |
| CHLORPROMAZINE HCL                 | 00312673 | CHLORDIAZEPOXIDE HCL | 00267090 | FAMOTIDINE | 02232293 |
| CHLORPROMAZINE HCL                 | 00312681 | CHLORDIAZEPOXIDE HCL | 00295051 | FAMOTIDINE | 02235133 |
| CHLORPROMAZINE HCL                 | 00312703 | CHLORDIAZEPOXIDE HCL | 00391077 | FAMOTIDINE | 02237004 |
| CHLORPROMAZINE HCL                 | 00324299 | CHLORDIAZEPOXIDE HCL | 00115630 | FAMOTIDINE | 02237150 |
| CHLORPROMAZINE HCL                 | 00324302 | CHLORDIAZEPOXIDE HCL | 00134333 | FAMOTIDINE | 02237223 |
| CHLORPROMAZINE HCL                 | 00386588 | CHLORDIAZEPOXIDE HCL | 00134325 | FAMOTIDINE | 02238212 |
| CHLORPROMAZINE HCL                 | 00386596 | CHLORDIAZEPOXIDE HCL | 00020923 | FAMOTIDINE | 02238342 |
| CHLORPROMAZINE HCL                 | 00386618 | CHLORDIAZEPOXIDE HCL | 00020931 | FAMOTIDINE | 02238343 |
| CHLORPROMAZINE HCL                 | 00430943 | CHLORDIAZEPOXIDE HCL | 00020915 | FAMOTIDINE | 02240414 |
| CHLORPROMAZINE HCL                 | 00430951 | CHLORDIAZEPOXIDE HCL | 02239110 | FAMOTIDINE | 02241322 |
| CHLORPROMAZINE HCL                 | 00430978 | CHLORDIAZEPOXIDE HCL | 00636223 | FAMOTIDINE | 02241372 |
| CHLORPROMAZINE HCL                 | 00478334 | CLOBAZAM             | 00846392 | FAMOTIDINE | 02241373 |
| CHLORPROMAZINE HCL                 | 00502456 | CLOBAZAM             | 01989634 | FAMOTIDINE | 02242154 |
| CHLORPROMAZINE HCL                 | 00502464 | CLOBAZAM             | 02221799 | FAMOTIDINE | 02242155 |
| CHLORPROMAZINE HCL                 | 00523097 | CLOBAZAM             | 02244474 | FAMOTIDINE | 02242326 |
| CHLORPROMAZINE HCL                 | 00627615 | CLOBAZAM             | 02238334 | FAMOTIDINE | 02242357 |
| CHLORPROMAZINE HCL                 | 00690805 | CLOBAZAM             | 02238797 | FAMOTIDINE | 02243053 |
| CHLORPROMAZINE HCL                 | 00743518 | CLOBAZAM             | 02244638 | FAMOTIDINE | 02244133 |
| CHLORPROMAZINE HCL                 | 00774383 | CLOBAZAM             | 00903405 | FAMOTIDINE | 02244795 |
| CHLORPROMAZINE HCL                 | 00903042 | CLOBAZAM             | 02247230 | FAMOTIDINE | 02244796 |
| CHLORPROMAZINE HCL                 | 01933272 | CLOBAZAM             | 02248454 | FAMOTIDINE | 02244888 |
| CHLORPROMAZINE HCL                 | 01985434 | CLOBAZAM             | 02347598 | FAMOTIDINE | 02244998 |
| CHLORPROMAZINE HCL                 | 01985442 | CLOBAZAM             | 09851844 | FAMOTIDINE | 02246364 |
| CHLORPROMAZINE HCL                 | 01985450 | CLOBAZAM             | 09851968 | FAMOTIDINE | 02247735 |
| CHLORPROMAZINE HCL INJ 25MG/ML USP | 01933272 | CLOBAZAM             | 22123230 | FAMOTIDINE | 02247745 |
| CHLORPROMAZINE HCL INJ 27.9MG/ML   | 00627615 | CLOBAZAM             | 99101484 | FAMOTIDINE | 02247799 |
| CHLORPROMAZINE HCL INJ USP         | 02382016 | CLOBAZAM             | 02244638 | FAMOTIDINE | 02247800 |
| CHLORPROMAZINE HCL INJECTION       | 00743518 | CLOBAZAM             | 02248454 | FAMOTIDINE | 02248222 |
| CHLORPROMAZINE TAB 25MG            | 00430943 | CLOBAZAM             | 02247230 | FAMOTIDINE | 02248223 |
| CHLORPROMAZINE TABLETS B.P. 100MG  | 01985442 | CLOBAZAM             | 02347598 | FAMOTIDINE | 02252902 |
| CHLORPROMAZINE TABLETS B.P. 25MG   | 01985434 | CLOBAZAM             | 02244474 | FAMOTIDINE | 02252910 |
| CHLORPROMAZINE TABLETS B.P. 50MG   | 01985450 | CLOBAZAM             | 02238797 | FAMOTIDINE | 02257645 |
| CHLORPROTHIXENE                    | 00013234 | CLOBAZAM             | 02238334 | FAMOTIDINE | 02257653 |

|    |                           |          |            |          |            |          |
|----|---------------------------|----------|------------|----------|------------|----------|
| 1  |                           |          |            |          |            |          |
| 2  |                           |          |            |          |            |          |
| 3  |                           |          |            |          |            |          |
| 4  |                           |          |            |          |            |          |
| 5  |                           |          |            |          |            |          |
| 6  |                           |          |            |          |            |          |
| 7  |                           |          |            |          |            |          |
| 8  |                           |          |            |          |            |          |
| 9  |                           |          |            |          |            |          |
| 10 |                           |          |            |          |            |          |
| 11 |                           |          |            |          |            |          |
| 12 |                           |          |            |          |            |          |
| 13 |                           |          |            |          |            |          |
| 14 |                           |          |            |          |            |          |
| 15 |                           |          |            |          |            |          |
| 16 |                           |          |            |          |            |          |
| 17 |                           |          |            |          |            |          |
| 18 |                           |          |            |          |            |          |
| 19 |                           |          |            |          |            |          |
| 20 |                           |          |            |          |            |          |
| 21 |                           |          |            |          |            |          |
| 22 |                           |          |            |          |            |          |
| 23 |                           |          |            |          |            |          |
| 24 |                           |          |            |          |            |          |
| 25 |                           |          |            |          |            |          |
| 26 |                           |          |            |          |            |          |
| 27 |                           |          |            |          |            |          |
| 28 |                           |          |            |          |            |          |
| 29 |                           |          |            |          |            |          |
| 30 |                           |          |            |          |            |          |
| 31 |                           |          |            |          |            |          |
| 32 |                           |          |            |          |            |          |
| 33 |                           |          |            |          |            |          |
| 34 |                           |          |            |          |            |          |
| 35 |                           |          |            |          |            |          |
| 36 |                           |          |            |          |            |          |
| 37 |                           |          |            |          |            |          |
| 38 |                           |          |            |          |            |          |
| 39 |                           |          |            |          |            |          |
| 40 |                           |          |            |          |            |          |
| 41 |                           |          |            |          |            |          |
| 42 |                           |          |            |          |            |          |
| 43 |                           |          |            |          |            |          |
| 44 |                           |          |            |          |            |          |
| 45 |                           |          |            |          |            |          |
| 46 |                           |          |            |          |            |          |
| 47 |                           |          |            |          |            |          |
| 48 |                           |          |            |          |            |          |
| 49 |                           |          |            |          |            |          |
| 50 |                           |          |            |          |            |          |
| 51 |                           |          |            |          |            |          |
| 52 |                           |          |            |          |            |          |
| 53 |                           |          |            |          |            |          |
| 54 |                           |          |            |          |            |          |
| 55 |                           |          |            |          |            |          |
| 56 |                           |          |            |          |            |          |
| 57 |                           |          |            |          |            |          |
| 58 |                           |          |            |          |            |          |
| 59 |                           |          |            |          |            |          |
| 60 |                           |          |            |          |            |          |
|    | CHLORPROTHIXENE           | 00013242 | CLONAZEPAM | 09852395 | FAMOTIDINE | 02259443 |
|    | CHLORPROTHIXENE           | 66124036 | CLONAZEPAM | 02345676 | FAMOTIDINE | 02259451 |
|    | CHLORPROTHIXENE           | 66124101 | CLONAZEPAM | 02230950 | FAMOTIDINE | 02273357 |
|    | CLOZAPINE                 | 00894745 | CLONAZEPAM | 02233960 | FAMOTIDINE | 02296098 |
|    | CLOZAPINE                 | 02247244 | CLONAZEPAM | 02239024 | FAMOTIDINE | 02347636 |
|    | CLOZAPINE                 | 02248034 | CLONAZEPAM | 02230366 | FAMOTIDINE | 02347644 |
|    | CLOZAPINE                 | 02247243 | CLONAZEPAM | 02236948 | FAMOTIDINE | 02373920 |
|    | CLOZAPINE                 | 00894737 | CLONAZEPAM | 02270641 | FAMOTIDINE | 02373939 |
|    | CLOZAPINE                 | 02240668 | CLONAZEPAM | 00382825 | FAMOTIDINE | 99304725 |
|    | CLOZAPINE                 | 02240669 | CLONAZEPAM | 02048701 | FAMOTIDINE | 02231119 |
|    | CLOZAPINE                 | 02247798 | CLONAZEPAM | 02173344 | FAMOTIDINE | 02244888 |
|    | CLOZAPINE                 | 02247805 | CLONAZEPAM | 02103656 | FAMOTIDINE | 02244998 |
|    | CLOZAPINE                 | 02248035 | CLONAZEPAM | 02145227 | FAMOTIDINE | 01953842 |
|    | CLOZAPINE                 | 02305003 | CLONAZEPAM | 02207818 | FAMOTIDINE | 01953834 |
|    | CLOZAPINE                 | 02305011 | CLONAZEPAM | 02177889 | FAMOTIDINE | 02257645 |
|    | CLOZAPINE                 | 02458748 | CLONAZEPAM | 02048736 | FAMOTIDINE | 02257653 |
|    | CLOZAPINE                 | 02458756 | CLONAZEPAM | 02177897 | FAMOTIDINE | 02238212 |
|    | CLOZAPINE                 | 22123233 | CLONAZEPAM | 02103737 | FAMOTIDINE | 02244133 |
|    | CLOZAPINE                 | 22472440 | CLONAZEPAM | 02173352 | FAMOTIDINE | 02246364 |
|    | CLOZAPINE                 | 90894737 | CLONAZEPAM | 02145243 | FAMOTIDINE | 02383071 |
|    | CLOZAPINE                 | 90894745 | CLONAZEPAM | 00382841 | FAMOTIDINE | 02383098 |
|    | CLOZAPINE TABLETS         | 02470020 | CLONAZEPAM | 02270676 | FAMOTIDINE | 02247799 |
|    | CLOZAPINE TABLETS         | 02470039 | CLONAZEPAM | 02230951 | FAMOTIDINE | 02247800 |
|    | DOM-LOXAPINE TABLETS 10MG | 02239919 | CLONAZEPAM | 02230369 | FAMOTIDINE | 02247745 |
|    | DOM-LOXAPINE TABLETS 25MG | 02239920 | CLONAZEPAM | 02233985 | FAMOTIDINE | 02247735 |
|    | DOM-LOXAPINE TABLETS 50MG | 02239921 | CLONAZEPAM | 02303337 | FAMOTIDINE | 02248222 |
|    | DOM-LOXAPINE TABLETS 5MG  | 02239918 | CLONAZEPAM | 02239025 | FAMOTIDINE | 02248223 |
|    | DOM-OLANZAPINE            | 02307324 | CLONAZEPAM | 00903559 | FAMOTIDINE | 02351102 |
|    | DOM-OLANZAPINE            | 02307332 | CLONAZEPAM | 00907197 | FAMOTIDINE | 02351110 |
|    | DOM-OLANZAPINE            | 02307340 | CLONAZEPAM | 00907200 | FAMOTIDINE | 02241372 |
|    | DOM-OLANZAPINE            | 02307359 | CLONAZEPAM | 02010365 | FAMOTIDINE | 02241373 |
|    | DOM-OLANZAPINE            | 02307367 | CLONAZEPAM | 02048728 | FAMOTIDINE | 02196018 |
|    | DOM-OLANZAPINE ODT        | 02307375 | CLONAZEPAM | 02078736 | FAMOTIDINE | 02196026 |
|    | DOM-OLANZAPINE ODT        | 02307383 | CLONAZEPAM | 02130998 | FAMOTIDINE | 02347636 |
|    | DOM-OLANZAPINE ODT        | 02307391 | CLONAZEPAM | 02131005 | FAMOTIDINE | 02347644 |
|    | DOM-RISPERIDONE           | 02278421 | CLONAZEPAM | 02131013 | FAMOTIDINE | 02024195 |
|    | DOM-RISPERIDONE           | 02278448 | CLONAZEPAM | 02145235 | FAMOTIDINE | 02024209 |
|    | DOM-RISPERIDONE           | 02278456 | CLONAZEPAM | 02179660 | FAMOTIDINE | 02238342 |
|    | DOM-RISPERIDONE           | 02278464 | CLONAZEPAM | 02220598 | FAMOTIDINE | 02238343 |
|    | DOM-RISPERIDONE           | 02278472 | CLONAZEPAM | 02220601 | FAMOTIDINE | 02242327 |
|    | DOM-RISPERIDONE           | 02278480 | CLONAZEPAM | 02224100 | FAMOTIDINE | 02242328 |
|    | DOM-RISPERIDONE           | 02309572 | CLONAZEPAM | 02230368 | FAMOTIDINE | 02240622 |
|    | DOM-RISPERIDONE ODT       | 02294478 | CLONAZEPAM | 02233982 | FAMOTIDINE | 02240623 |

1  
2  
3  
4  
5  
6  
7  
8  
9  
10  
11  
12  
13  
14  
15  
16  
17  
18  
19  
20  
21  
22  
23  
24  
25  
26  
27  
28  
29  
30  
31  
32  
33  
34  
35  
36  
37  
38  
39  
40  
41  
42  
43  
44  
45  
46  
47  
48  
49  
50  
51  
52  
53  
54  
55  
56  
57  
58  
59  
60

|                                    |          |            |          |              |          |
|------------------------------------|----------|------------|----------|--------------|----------|
| DOM-RISPERIDONE ODT                | 02294486 | CLONAZEPAM | 02235370 | FAMOTIDINE   | 02242154 |
| DOM-RISPERIDONE ODT                | 02294494 | CLONAZEPAM | 02235379 | FAMOTIDINE   | 02242155 |
| DROPERIDOL                         | 00132446 | CLONAZEPAM | 02236947 | FAMOTIDINE   | 02022133 |
| DROPERIDOL                         | 00554251 | CLONAZEPAM | 02237277 | FAMOTIDINE   | 02022141 |
| DROPERIDOL                         | 02157832 | CLONAZEPAM | 02237278 | LANSOPRAZOLE | 02433001 |
| DROPERIDOL                         | 02167832 | CLONAZEPAM | 02242077 | LANSOPRAZOLE | 02402610 |
| DROPERIDOL                         | 02232449 | CLONAZEPAM | 02242078 | LANSOPRAZOLE | 02357682 |
| DROPERIDOL INJECTION               | 02232449 | CLONAZEPAM | 02270668 | LANSOPRAZOLE | 02353830 |
| DROPERIDOL INJECTION USP 2.5MG/ML  | 02167832 | CLONAZEPAM | 02280639 | LANSOPRAZOLE | 02385643 |
| FLUPENTIXOL                        | 02156008 | CLONAZEPAM | 02303302 | LANSOPRAZOLE | 02293811 |
| FLUPENTIXOL                        | 02156040 | CLONAZEPAM | 02303310 | LANSOPRAZOLE | 02280515 |
| FLUPENTIXOL                        | 02156016 | CLONAZEPAM | 02303329 | LANSOPRAZOLE | 02165503 |
| FLUPENTIXOL                        | 02331721 | CLONAZEPAM | 02311593 | LANSOPRAZOLE | 02395258 |
| FLUPENTIXOL (FLUPENTIXOL DIHCL)    | 02156016 | CLONAZEPAM | 02311607 | LANSOPRAZOLE | 02353849 |
| FLUPENTIXOL (FLUPENTIXOL DIHCL)    | 02156008 | CLONAZEPAM | 02311615 | LANSOPRAZOLE | 02402629 |
| FLUPENTIXOL DECANOATE              | 00524530 | CLONAZEPAM | 02340968 | LANSOPRAZOLE | 02357690 |
| FLUPENTIXOL DECANOATE              | 00524522 | CLONAZEPAM | 02340976 | LANSOPRAZOLE | 02385651 |
| FLUPENTIXOL DECANOATE              | 02156032 | CLONAZEPAM | 02344602 | LANSOPRAZOLE | 02293838 |
| FLUPENTIXOL DECANOATE              | 02024950 | CLONAZEPAM | 02344610 | LANSOPRAZOLE | 02280523 |
| FLUPENTIXOL DECANOATE              | 02024969 | CLONAZEPAM | 02344629 | LANSOPRAZOLE | 02165511 |
| FLUPENTIXOL DECANOATE              | 02091895 | CLONAZEPAM | 02365243 | LANSOPRAZOLE | 02433028 |
| FLUPENTIXOL DECANOATE              | 02092816 | CLONAZEPAM | 02365251 | LANSOPRAZOLE | 02395266 |
| FLUPENTIXOL DECANOATE              | 02242363 | CLONAZEPAM | 02365278 | LANSOPRAZOLE | 00000100 |
| FLUPENTIXOL DECANOATE              | 02242364 | CLONAZEPAM | 02442027 | LANSOPRAZOLE | 02249472 |
| FLUPENTIXOL DECANOATE              | 02331713 | CLONAZEPAM | 02442035 | LANSOPRAZOLE | 02249464 |
| FLUPENTIXOL DECANOATE              | 09857337 | CLONAZEPAM | 02442043 | LANSOPRAZOLE | 02258609 |
| FLUPENTIXOL DECANOATE              | 09857339 | CLONAZEPAM | 02442051 | LANSOPRAZOLE | 02258617 |
| FLUPENTIXOL DECANOATE INJECTION BP | 02331713 | CLONAZEPAM | 22123231 | LANSOPRAZOLE | 02354756 |
| FLUPENTIXOL DECANOATE INJECTION BP | 02331721 | CLONAZEPAM | 82048736 | LANSOPRAZOLE | 02354764 |
| FLUPENTIXOL DIHCL                  | 00585157 | CLONAZEPAM | 82207818 | LANSOPRAZOLE | 02366274 |
| FLUPENTIXOL DIHCL                  | 00580619 | CLONAZEPAM | 02365243 | LANSOPRAZOLE | 02366282 |
| FLUPENTIXOL HCL                    | 00580619 | CLONAZEPAM | 02365251 | LANSOPRAZOLE | 02367815 |
| FLUPENTIXOL HCL                    | 00585157 | CLONAZEPAM | 02365278 | LANSOPRAZOLE | 02367823 |
| FLUPENTIXOL HCL                    | 00392316 | CLONAZEPAM | 02177889 | LANSOPRAZOLE | 02369001 |
| FLUPENTIXOL HCL                    | 00544426 | CLONAZEPAM | 02177897 | LANSOPRAZOLE | 02369028 |
| FLUPENTIXOL HCL                    | 02024942 | CLONAZEPAM | 02344602 | LANSOPRAZOLE | 02385767 |
| FLUPENTIXOL HCL                    | 02025043 | CLONAZEPAM | 02344610 | LANSOPRAZOLE | 02385775 |
| FLUPENTIXOL HCL                    | 02091860 | CLONAZEPAM | 02442027 | LANSOPRAZOLE | 02410370 |
| FLUPENTIXOL HCL                    | 02092794 | CLONAZEPAM | 02442035 | LANSOPRAZOLE | 02410389 |
| FLUPENTIXOL HCL                    | 02129086 | CLONAZEPAM | 02442043 | LANSOPRAZOLE | 02414775 |
| FLUPENTIXOL HCL                    | 02156024 | CLONAZEPAM | 02442051 | LANSOPRAZOLE | 02422808 |
| FLUPHENAZINE DECANOATE             | 00755575 | CLONAZEPAM | 02220598 | LANSOPRAZOLE | 02422816 |
| FLUPHENAZINE DECANOATE             | 02091275 | CLONAZEPAM | 02220601 | LANSOPRAZOLE | 02433672 |



|    |                                       |          |                         |          |                     |          |
|----|---------------------------------------|----------|-------------------------|----------|---------------------|----------|
| 1  |                                       |          |                         |          |                     |          |
| 2  | FLUPHENAZINE DECANOATE                | 00349917 | CLONAZEPAM              | 02344629 | LANSOPRAZOLE        | 09991289 |
| 3  | FLUPHENAZINE DECANOATE                | 02137402 | CLONAZEPAM              | 02270641 | LANSOPRAZOLE        | 99503010 |
| 4  | FLUPHENAZINE DECANOATE                | 02189089 | CLONAZEPAM              | 02270668 | LANSOPRAZOLE        | 02470780 |
| 5  | FLUPHENAZINE DECANOATE                | 02189097 | CLONAZEPAM              | 02270676 | LANSOPRAZOLE        | 02293811 |
| 6  | FLUPHENAZINE DECANOATE                | 02211157 | CLONAZEPAM              | 02130998 | LANSOPRAZOLE        | 02293838 |
| 7  | FLUPHENAZINE DECANOATE                | 02211165 | CLONAZEPAM              | 02131013 | LANSOPRAZOLE        | 02414767 |
| 8  | FLUPHENAZINE DECANOATE                | 02239636 | CLONAZEPAM              | 02224100 | LANSOPRAZOLE        | 02414775 |
| 9  | FLUPHENAZINE DECANOATE                | 02241928 | CLONAZEPAM              | 02230950 | LANSOPRAZOLE        | 02357682 |
| 10 | FLUPHENAZINE DECANOATE                | 02242570 | CLONAZEPAM              | 02230951 | LANSOPRAZOLE        | 02357690 |
| 11 | FLUPHENAZINE DECANOATE INJECTION B.P. | 02189089 | CLONAZEPAM              | 02173344 | LANSOPRAZOLE        | 02366282 |
| 12 | FLUPHENAZINE DECANOATE INJECTION B.P. | 02189097 | CLONAZEPAM              | 02173352 | LANSOPRAZOLE        | 02385767 |
| 13 | FLUPHENAZINE DECANOATE INJECTION, USP | 02383225 | CLONAZEPAM              | 02236947 | LANSOPRAZOLE        | 02410389 |
| 14 | FLUPHENAZINE ENANTHATE                | 00029173 | CLONAZEPAM              | 02145227 | LANSOPRAZOLE        | 02433001 |
| 15 | FLUPHENAZINE HCL                      | 00029378 | CLONAZEPAM              | 02145235 | LANSOPRAZOLE        | 02433028 |
| 16 | FLUPHENAZINE HCL                      | 00405345 | CLONAZEPAM              | 02145243 | LANSOPRAZOLE        | 02433672 |
| 17 | FLUPHENAZINE HCL                      | 00245240 | CLONAZEPAM              | 02236948 | LANSOPRAZOLE        | 02410370 |
| 18 | FLUPHENAZINE HCL                      | 00410632 | CLONAZEPAM              | 02048701 | LANSOPRAZOLE        | 02385775 |
| 19 | FLUPHENAZINE HCL                      | 00029386 | CLONAZEPAM              | 02048728 | LANSOPRAZOLE        | 02489805 |
| 20 | FLUPHENAZINE HCL                      | 00504459 | CLONAZEPAM              | 02048736 | LANSOPRAZOLE        | 02489813 |
| 21 | FLUPHENAZINE HCL                      | 00405361 | CLONAZEPAM              | 02179660 | LANSOPRAZOLE        | 02353830 |
| 22 | FLUPHENAZINE HCL                      | 00029408 | CLONAZEPAM              | 02207818 | LANSOPRAZOLE        | 02353849 |
| 23 | FLUPHENAZINE HCL                      | 00029394 | CLONAZEPAM              | 02311593 | LANSOPRAZOLE        | 02392402 |
| 24 | FLUPHENAZINE HCL                      | 00405353 | CLONAZEPAM              | 02311607 | LANSOPRAZOLE        | 02392410 |
| 25 | FLUPHENAZINE HCL                      | 00471518 | CLONAZEPAM              | 02311615 | LANSOPRAZOLE        | 02354756 |
| 26 | FLUPHENAZINE HCL                      | 00504424 | CLONAZEPAM              | 02103656 | LANSOPRAZOLE        | 02354764 |
| 27 | FLUPHENAZINE HCL                      | 00504432 | CLONAZEPAM              | 02103737 | LANSOPRAZOLE        | 02395258 |
| 28 | FLUPHENAZINE HCL                      | 00563803 | CLONAZEPAM              | 02242077 | LANSOPRAZOLE        | 02395266 |
| 29 | FLUPHENAZINE HCL                      | 00563838 | CLONAZEPAM              | 02242078 | LANSOPRAZOLE        | 02369001 |
| 30 | FLUPHENAZINE HCL                      | 00563846 | CLONAZEPAM              | 02233960 | LANSOPRAZOLE        | 02369028 |
| 31 | FLUPHENAZINE HCL                      | 00582514 | CLONAZEPAM              | 02233982 | LANSOPRAZOLE        | 02402610 |
| 32 | FLUPHENAZINE HCL                      | 00632643 | CLONAZEPAM              | 02233985 | LANSOPRAZOLE        | 02402629 |
| 33 | FLUPHENAZINE HCL                      | 00726338 | CLONAZEPAM              | 02239024 | LANSOPRAZOLE        | 02422808 |
| 34 | FLUPHENAZINE HCL                      | 00726346 | CLONAZEPAM              | 02239025 | LANSOPRAZOLE        | 02422816 |
| 35 | FLUPHENAZINE HCL                      | 00726354 | CLONAZEPAM              | 02303310 | LANSOPRAZOLE        | 02385643 |
| 36 | FLUPHENAZINE HCL                      | 00893420 | CLONAZEPAM              | 02303329 | LANSOPRAZOLE        | 02385651 |
| 37 | FLUPHENAZINE HCL                      | 02244166 | CLONAZEPAM              | 02303337 | LANSOPRAZOLE        | 02280515 |
| 38 | FLUPHENAZINE HCL                      | 00405353 | CLONAZEPAM              | 02345676 | LANSOPRAZOLE        | 02280523 |
| 39 | FLUPHENAZINE HCL                      | 00405345 | CLORAZEPATE DIPOTASSIUM | 00628212 | LANSOPRAZOLE SODIUM | 02258080 |
| 40 | FLUPHENAZINE HCL                      | 00405361 | CLORAZEPATE DIPOTASSIUM | 00264911 | NAPROXEN            | 02443449 |
| 41 | FLUPHENAZINE HCL                      | 00410632 | CLORAZEPATE DIPOTASSIUM | 00860697 | NAPROXEN            | 02458608 |
| 42 | FLUPHENAZINE HCL                      | 00563846 | CLORAZEPATE DIPOTASSIUM | 00860689 | NAPROXEN            | 02361701 |
| 43 | FLUPHENAZINE HCL                      | 00563838 | CLORAZEPATE DIPOTASSIUM | 00628190 | NAPROXEN            | 02361728 |
| 44 | FLUPHENAZINE HCL                      | 00563803 | CLORAZEPATE DIPOTASSIUM | 00264938 | NIZATIDINE          | 00778338 |
| 45 |                                       |          |                         |          |                     |          |
| 46 |                                       |          |                         |          |                     |          |
| 47 |                                       |          |                         |          |                     |          |
| 48 |                                       |          |                         |          |                     |          |
| 49 |                                       |          |                         |          |                     |          |
| 50 |                                       |          |                         |          |                     |          |
| 51 |                                       |          |                         |          |                     |          |
| 52 |                                       |          |                         |          |                     |          |
| 53 |                                       |          |                         |          |                     |          |
| 54 |                                       |          |                         |          |                     |          |
| 55 |                                       |          |                         |          |                     |          |
| 56 |                                       |          |                         |          |                     |          |
| 57 |                                       |          |                         |          |                     |          |
| 58 |                                       |          |                         |          |                     |          |
| 59 |                                       |          |                         |          |                     |          |
| 60 |                                       |          |                         |          |                     |          |

1  
2  
3  
4  
5  
6  
7  
8  
9  
10  
11  
12  
13  
14  
15  
16  
17  
18  
19  
20  
21  
22  
23  
24  
25  
26  
27  
28  
29  
30  
31  
32  
33  
34  
35  
36  
37  
38  
39  
40  
41  
42  
43  
44  
45  
46  
47  
48  
49  
50  
51  
52  
53  
54  
55  
56  
57  
58  
59  
60

|                  |          |                         |          |            |          |
|------------------|----------|-------------------------|----------|------------|----------|
| FLUPHENAZINE HCL | 00582514 | CLORAZEPATE DIPOTASSIUM | 00628204 | NIZATIDINE | 02177714 |
| FLUPHENAZINE HCL | 00726338 | CLORAZEPATE DIPOTASSIUM | 00264946 | NIZATIDINE | 02220156 |
| FLUPHENAZINE HCL | 00726346 | CLORAZEPATE DIPOTASSIUM | 00860700 | NIZATIDINE | 02240457 |
| FLUPHENAZINE HCL | 00726354 | CLORAZEPATE DIPOTASSIUM | 49264946 | NIZATIDINE | 02246046 |
| FLUPHENAZINE HCL | 00893420 | CLORAZEPATE DIPOTASSIUM | 00264946 | NIZATIDINE | 02240458 |
| FLUSPIRILENE     | 00542903 | CLORAZEPATE DIPOTASSIUM | 00264938 | NIZATIDINE | 02246047 |
| FLUSPIRILENE     | 00368393 | CLORAZEPATE DIPOTASSIUM | 00264911 | NIZATIDINE | 00778346 |
| FLUSPIRILENE     | 00542903 | CLORAZEPATE DIPOTASSIUM | 00628204 | NIZATIDINE | 02220164 |
| FLUSPIRILENE     | 00368393 | CLORAZEPATE DIPOTASSIUM | 00628190 | NIZATIDINE | 02177722 |
| GEN-CLOZAPINE    | 02247243 | CLORAZEPATE DIPOTASSIUM | 00628212 | NIZATIDINE | 00220156 |
| GEN-CLOZAPINE    | 02247244 | CLORAZEPATE DIPOTASSIUM | 00860689 | NIZATIDINE | 02128888 |
| GEN-CLOZAPINE    | 02305003 | CLORAZEPATE DIPOTASSIUM | 00860697 | NIZATIDINE | 02128896 |
| GEN-CLOZAPINE    | 02305011 | CLORAZEPATE DIPOTASSIUM | 00860700 | NIZATIDINE | 02155737 |
| GEN-CLOZAPINE    | 02421097 | DIAZEPAM                | 00012874 | NIZATIDINE | 02155745 |
| HALOPERIDOL      | 00749419 | DIAZEPAM                | 00466891 | NIZATIDINE | 02185814 |
| HALOPERIDOL      | 00396796 | DIAZEPAM                | 00405337 | NIZATIDINE | 02185822 |
| HALOPERIDOL      | 00017655 | DIAZEPAM                | 00272450 | NIZATIDINE | 02230976 |
| HALOPERIDOL      | 00363685 | DIAZEPAM                | 00013773 | NIZATIDINE | 02238194 |
| HALOPERIDOL      | 00552135 | DIAZEPAM                | 00272639 | NIZATIDINE | 02238195 |
| HALOPERIDOL      | 00587702 | DIAZEPAM                | 00013293 | NIZATIDINE | 02239558 |
| HALOPERIDOL      | 00463698 | DIAZEPAM                | 00891797 | NIZATIDINE | 02239559 |
| HALOPERIDOL      | 00381772 | DIAZEPAM                | 00272647 | NIZATIDINE | 02247051 |
| HALOPERIDOL      | 00713449 | DIAZEPAM                | 00405329 | NIZATIDINE | 02247052 |
| HALOPERIDOL      | 00749451 | DIAZEPAM                | 00466905 | NIZATIDINE | 02220156 |
| HALOPERIDOL      | 00749427 | DIAZEPAM                | 00013757 | NIZATIDINE | 02220164 |
| HALOPERIDOL      | 00552143 | DIAZEPAM                | 00272434 | NIZATIDINE | 02185814 |
| HALOPERIDOL      | 00396818 | DIAZEPAM                | 00013277 | NIZATIDINE | 02246046 |
| HALOPERIDOL      | 00017663 | DIAZEPAM                | 00602825 | NIZATIDINE | 02246047 |
| HALOPERIDOL      | 00363677 | DIAZEPAM                | 02065614 | NIZATIDINE | 02239558 |
| HALOPERIDOL      | 00499579 | DIAZEPAM                | 00013285 | NIZATIDINE | 02239559 |
| HALOPERIDOL      | 00768820 | DIAZEPAM                | 00280429 | NIZATIDINE | 02240457 |
| HALOPERIDOL      | 00017582 | DIAZEPAM                | 00396230 | NIZATIDINE | 02240458 |
| HALOPERIDOL      | 00396826 | DIAZEPAM                | 00362158 | NIZATIDINE | 02247051 |
| HALOPERIDOL      | 00017671 | DIAZEPAM                | 00272442 | NIZATIDINE | 02247052 |
| HALOPERIDOL      | 00363669 | DIAZEPAM                | 00013765 | NIZATIDINE | 02238194 |
| HALOPERIDOL      | 00749435 | DIAZEPAM                | 02386143 | NIZATIDINE | 02238195 |
| HALOPERIDOL      | 00552429 | DIAZEPAM                | 00399728 | NIZATIDINE | 02177722 |
| HALOPERIDOL      | 00396834 | DIAZEPAM                | 09857240 | NIZATIDINE | 02177714 |
| HALOPERIDOL      | 00017698 | DIAZEPAM                | 09853340 | OMEPRAZOLE | 02119579 |
| HALOPERIDOL      | 00363650 | DIAZEPAM                | 09853430 | OMEPRAZOLE | 02230737 |
| HALOPERIDOL      | 00749443 | DIAZEPAM                | 02238162 | OMEPRAZOLE | 02245058 |
| HALOPERIDOL      | 00017574 | DIAZEPAM                | 00012661 | OMEPRAZOLE | 00846503 |
| HALOPERIDOL      | 00587788 | DIAZEPAM                | 00012688 | OMEPRAZOLE | 09857285 |

|    |                                            |          |          |          |            |          |
|----|--------------------------------------------|----------|----------|----------|------------|----------|
| 1  |                                            |          |          |          |            |          |
| 2  | HALOPERIDOL                                | 00587796 | DIAZEPAM | 00013110 | OMEPRAZOLE | 09857343 |
| 3  |                                            |          |          |          |            |          |
| 4  | HALOPERIDOL                                | 00647969 | DIAZEPAM | 00037265 | OMEPRAZOLE | 09857342 |
| 5  | HALOPERIDOL                                | 00728292 | DIAZEPAM | 00260320 | OMEPRAZOLE | 09857341 |
| 6  | HALOPERIDOL                                | 00728306 | DIAZEPAM | 00260339 | OMEPRAZOLE | 02348691 |
| 7  |                                            |          |          |          |            |          |
| 8  | HALOPERIDOL                                | 00745561 | DIAZEPAM | 00260347 | OMEPRAZOLE | 02403617 |
| 9  | HALOPERIDOL                                | 00759503 | DIAZEPAM | 00276642 | OMEPRAZOLE | 02329433 |
| 10 | HALOPERIDOL                                | 00761745 | DIAZEPAM | 00276650 | OMEPRAZOLE | 02320851 |
| 11 | HALOPERIDOL                                | 00761753 | DIAZEPAM | 00285439 | OMEPRAZOLE | 02296446 |
| 12 |                                            |          |          |          |            |          |
| 13 | HALOPERIDOL                                | 00761761 | DIAZEPAM | 00299545 | OMEPRAZOLE | 09857314 |
| 14 | HALOPERIDOL                                | 02229307 | DIAZEPAM | 00303461 | OMEPRAZOLE | 09857530 |
| 15 | HALOPERIDOL                                | 02366010 | DIAZEPAM | 00311596 | OMEPRAZOLE | 09857464 |
| 16 |                                            |          |          |          |            |          |
| 17 | HALOPERIDOL                                | 02406411 | DIAZEPAM | 00313580 | OMEPRAZOLE | 02416549 |
| 18 | HALOPERIDOL                                | 80363669 | DIAZEPAM | 00313890 | OMEPRAZOLE | 02374870 |
| 19 | HALOPERIDOL                                | 99100846 | DIAZEPAM | 00315052 | OMEPRAZOLE | 02295415 |
| 20 | HALOPERIDOL DECANOATE                      | 09853758 | DIAZEPAM | 00315060 | OMEPRAZOLE | 09857500 |
| 21 |                                            |          |          |          |            |          |
| 22 | HALOPERIDOL DECANOATE                      | 00599093 | DIAZEPAM | 00315079 | OMEPRAZOLE | 09857267 |
| 23 | HALOPERIDOL DECANOATE                      | 02130300 | DIAZEPAM | 00324264 | OMEPRAZOLE | 09857195 |
| 24 | HALOPERIDOL DECANOATE                      | 00980803 | DIAZEPAM | 00324272 | OMEPRAZOLE | 02190915 |
| 25 |                                            |          |          |          |            |          |
| 26 | HALOPERIDOL DECANOATE                      | 02130297 | DIAZEPAM | 00324957 | OMEPRAZOLE | 02260867 |
| 27 | HALOPERIDOL DECANOATE                      | 00599085 | DIAZEPAM | 00325422 | OMEPRAZOLE | 02242462 |
| 28 | HALOPERIDOL DECANOATE                      | 00559093 | DIAZEPAM | 00326933 | OMEPRAZOLE | 02245059 |
| 29 | HALOPERIDOL DECANOATE                      | 00897426 | DIAZEPAM | 00337307 | OMEPRAZOLE | 02260859 |
| 30 |                                            |          |          |          |            |          |
| 31 | HALOPERIDOL DECANOATE                      | 00980781 | DIAZEPAM | 00345601 | OMEPRAZOLE | 02295407 |
| 32 | HALOPERIDOL DECANOATE                      | 02099616 | DIAZEPAM | 00345628 | OMEPRAZOLE | 02296438 |
| 33 | HALOPERIDOL DECANOATE                      | 02099624 | DIAZEPAM | 00392847 | OMEPRAZOLE | 02310252 |
| 34 |                                            |          |          |          |            |          |
| 35 | HALOPERIDOL DECANOATE                      | 02194430 | DIAZEPAM | 00392855 | OMEPRAZOLE | 02320843 |
| 36 | HALOPERIDOL DECANOATE                      | 02194449 | DIAZEPAM | 00392863 | OMEPRAZOLE | 02329425 |
| 37 | HALOPERIDOL DECANOATE                      | 02211130 | DIAZEPAM | 00404632 | OMEPRAZOLE | 02331764 |
| 38 | HALOPERIDOL DECANOATE                      | 02211149 | DIAZEPAM | 00409632 | OMEPRAZOLE | 02331772 |
| 39 |                                            |          |          |          |            |          |
| 40 | HALOPERIDOL DECANOATE                      | 02230707 | DIAZEPAM | 00432377 | OMEPRAZOLE | 02333430 |
| 41 | HALOPERIDOL DECANOATE                      | 02230708 | DIAZEPAM | 00432385 | OMEPRAZOLE | 02335220 |
| 42 | HALOPERIDOL DECANOATE                      | 02236866 | DIAZEPAM | 00432393 | OMEPRAZOLE | 02339927 |
| 43 |                                            |          |          |          |            |          |
| 44 | HALOPERIDOL DECANOATE                      | 02239639 | DIAZEPAM | 00434388 | OMEPRAZOLE | 02340100 |
| 45 | HALOPERIDOL DECANOATE                      | 02239640 | DIAZEPAM | 00434396 | OMEPRAZOLE | 02340119 |
| 46 | HALOPERIDOL DECANOATE                      | 02242361 | DIAZEPAM | 00446750 | OMEPRAZOLE | 02358050 |
| 47 |                                            |          |          |          |            |          |
| 48 | HALOPERIDOL DECANOATE                      | 02242362 | DIAZEPAM | 00446769 | OMEPRAZOLE | 02358069 |
| 49 | HALOPERIDOL DECANOATE                      | 02242631 | DIAZEPAM | 00448850 | OMEPRAZOLE | 02364352 |
| 50 | HALOPERIDOL DECANOATE INJ. LIQ IM 100MG/ML | 02099624 | DIAZEPAM | 00448869 | OMEPRAZOLE | 02372258 |
| 51 | HALOPERIDOL DECANOATE INJ. LIQ IM 50MG/ML  | 02099616 | DIAZEPAM | 00448877 | OMEPRAZOLE | 02372274 |
| 52 |                                            |          |          |          |            |          |
| 53 | HALOPERIDOL DECANOATE INJECTION            | 02194430 | DIAZEPAM | 00507962 | OMEPRAZOLE | 02385384 |
| 54 | HALOPERIDOL DECANOATE INJECTION            | 02194449 | DIAZEPAM | 00507970 | OMEPRAZOLE | 02402416 |
| 55 | HALOPERIDOL DECANOATE INJECTION            | 02383748 | DIAZEPAM | 00519324 | OMEPRAZOLE | 02411857 |
| 56 | HALOPERIDOL DECANOATE INJECTION            | 02383756 | DIAZEPAM | 00882380 | OMEPRAZOLE | 02422212 |
| 57 |                                            |          |          |          |            |          |
| 58 |                                            |          |          |          |            |          |
| 59 |                                            |          |          |          |            |          |
| 60 |                                            |          |          |          |            |          |

1  
2  
3  
4  
5  
6  
7  
8  
9  
10  
11  
12  
13  
14  
15  
16  
17  
18  
19  
20  
21  
22  
23  
24  
25  
26  
27  
28  
29  
30  
31  
32  
33  
34  
35  
36  
37  
38  
39  
40  
41  
42  
43  
44  
45  
46  
47  
48  
49  
50  
51  
52  
53  
54  
55  
56  
57  
58  
59  
60

|                            |          |                            |          |                                   |          |
|----------------------------|----------|----------------------------|----------|-----------------------------------|----------|
| HALOPERIDOL INJ 5MG/ML USP | 00808652 | DIAZEPAM                   | 00882968 | OMEPRAZOLE                        | 02422220 |
| HALOPERIDOL INJECTION      | 02366010 | DIAZEPAM                   | 00964999 | OMEPRAZOLE                        | 02435683 |
| HALOPERIDOL INJECTION, USP | 02406411 | DIAZEPAM                   | 02005492 | OMEPRAZOLE                        | 02438968 |
| HALOPERIDOL LA             | 02130297 | DIAZEPAM                   | 02070944 | OMEPRAZOLE                        | 02439018 |
| HALOPERIDOL LA             | 02130300 | DIAZEPAM                   | 02070952 | OMEPRAZOLE                        | 09093299 |
| HALOPERIDOL LACTATE        | 00749400 | DIAZEPAM                   | 02070960 | OMEPRAZOLE                        | 09857350 |
| HALOPERIDOL LACTATE        | 00808652 | DIAZEPAM                   | 02137399 | OMEPRAZOLE                        | 09857391 |
| HALOPERIDOL LONG ACTING    | 02236866 | DIAZEPAM                   | 02232737 | OMEPRAZOLE                        | 09857467 |
| HALOPERIDOL LONG ACTING    | 02242631 | DIAZEPAM                   | 02232749 | OMEPRAZOLE                        | 09991011 |
| HALOPERIDOL TAB 0.5MG      | 00587796 | DIAZEPAM                   | 02232751 | OMEPRAZOLE                        | 22123268 |
| HALOPERIDOL TAB 1MG        | 00587788 | DIAZEPAM                   | 02243240 | OMEPRAZOLE                        | 66123550 |
| HALOPERIDOL TAB 2MG        | 00761745 | DIAZEPAM                   | 02247173 | OMEPRAZOLE                        | 02245058 |
| HALOPERIDOL TAB 5MG        | 00761753 | DIAZEPAM                   | 02247174 | OMEPRAZOLE                        | 02245059 |
| HALOPERIDOL-10 TAB 10MG    | 00761761 | DIAZEPAM                   | 02247176 | OMEPRAZOLE                        | 02422212 |
| HALOPERIDOL-LA OMEGA       | 02239639 | DIAZEPAM                   | 02247490 | OMEPRAZOLE                        | 02422220 |
| HALOPERIDOL-LA OMEGA       | 02239640 | DIAZEPAM                   | 02247491 | OMEPRAZOLE                        | 02364352 |
| IPG-OLANZAPINE             | 02418975 | DIAZEPAM                   | 02247492 | OMEPRAZOLE                        | 02329425 |
| IPG-OLANZAPINE             | 02418983 | DIAZEPAM                   | 02385392 | OMEPRAZOLE                        | 02329433 |
| IPG-OLANZAPINE             | 02418991 | DIAZEPAM                   | 09991151 | OMEPRAZOLE                        | 02339927 |
| IPG-OLANZAPINE             | 02419009 | DIAZEPAM                   | 22123237 | OMEPRAZOLE                        | 02348691 |
| IPG-OLANZAPINE             | 02419017 | DIAZEPAM                   | 99101249 | OMEPRAZOLE                        | 02385376 |
| IPG-OLANZAPINE             | 02419025 | DIAZEPAM                   | 02247173 | OMEPRAZOLE                        | 02385384 |
| IPG-OLANZAPINE ODT         | 02387506 | DIAZEPAM                   | 02247174 | OMEPRAZOLE                        | 02411857 |
| IPG-OLANZAPINE ODT         | 02387514 | DIAZEPAM                   | 02247176 | OMEPRAZOLE                        | 02320843 |
| IPG-OLANZAPINE ODT         | 02387522 | DIAZEPAM                   | 00362158 | OMEPRAZOLE                        | 02320851 |
| IPG-OLANZAPINE ODT         | 02387530 | DIAZEPAM                   | 00405329 | OMEPRAZOLE                        | 02372258 |
| IPG-RISPERIDONE            | 02359057 | DIAZEPAM                   | 00405337 | OMEPRAZOLE                        | 02372274 |
| IPG-RISPERIDONE            | 02359065 | DIAZEPAM                   | 02232751 | OMEPRAZOLE                        | 02403617 |
| IPG-RISPERIDONE            | 02359073 | DIAZEPAM                   | 00434388 | OMEPRAZOLE                        | 02296438 |
| IPG-RISPERIDONE            | 02359081 | DIAZEPAM                   | 02232737 | OMEPRAZOLE                        | 02296446 |
| IPG-RISPERIDONE            | 02359103 | DIAZEPAM                   | 00434396 | OMEPRAZOLE (OMEPRAZOLE MAGNESIUM) | 02432765 |
| IPG-RISPERIDONE            | 02359111 | DIAZEPAM                   | 00313580 | OMEPRAZOLE (OMEPRAZOLE MAGNESIUM) | 02484617 |
| JAMP OLANZAPINE FC         | 02417243 | DIAZEPAM                   | 02232749 | OMEPRAZOLE (OMEPRAZOLE MAGNESIUM) | 02436728 |
| JAMP OLANZAPINE FC         | 02417251 | DIAZEPAM                   | 02243240 | OMEPRAZOLE (OMEPRAZOLE MAGNESIUM) | 02449927 |
| JAMP OLANZAPINE FC         | 02417278 | DIAZEPAM                   | 02386143 | OMEPRAZOLE (OMEPRAZOLE MAGNESIUM) | 02333422 |
| JAMP OLANZAPINE FC         | 02417286 | DIAZEPAM                   | 00399728 | OMEPRAZOLE (OMEPRAZOLE MAGNESIUM) | 02333430 |
| JAMP OLANZAPINE FC         | 02417294 | DIAZEPAM                   | 02385392 | OMEPRAZOLE (OMEPRAZOLE MAGNESIUM) | 02420198 |
| JAMP OLANZAPINE FC         | 02417308 | DIAZEPAM                   | 02247490 | OMEPRAZOLE (OMEPRAZOLE MAGNESIUM) | 02439549 |
| JAMP OLANZAPINE ODT        | 02406624 | DIAZEPAM                   | 02247491 | OMEPRAZOLE (OMEPRAZOLE MAGNESIUM) | 02435748 |
| JAMP OLANZAPINE ODT        | 02406632 | DIAZEPAM                   | 02247492 | OMEPRAZOLE (OMEPRAZOLE MAGNESIUM) | 02432765 |
| JAMP OLANZAPINE ODT        | 02406640 | DIAZEPAM                   | 00891797 | OMEPRAZOLE (OMEPRAZOLE MAGNESIUM) | 02439018 |
| JAMP OLANZAPINE ODT        | 02406659 | DIAZEPAM & METHYLCELLULOSE | 66990914 | OMEPRAZOLE (OMEPRAZOLE MAGNESIUM) | 02490692 |
| JAMP QUETIAPINE FUMARATE   | 02390140 | ESTAZOLAM                  | 02015102 | OMEPRAZOLE (OMEPRAZOLE MAGNESIUM) | 02436213 |

|    |                                       |          |                        |          |                                                  |          |
|----|---------------------------------------|----------|------------------------|----------|--------------------------------------------------|----------|
| 1  |                                       |          |                        |          |                                                  |          |
| 2  | JAMP QUETIAPINE FUMARATE              | 02390159 | ESTAZOLAM              | 02016060 | OMEPRAZOLE (OMEPRAZOLE MAGNESIUM)                | 02416549 |
| 3  | JAMP QUETIAPINE FUMARATE              | 02390167 | ESTAZOLAM              | 02016060 | OMEPRAZOLE (OMEPRAZOLE MAGNESIUM)                | 02433281 |
| 4  | JAMP QUETIAPINE FUMARATE              | 02390175 | ESTAZOLAM              | 02015102 | OMEPRAZOLE (OMEPRAZOLE MAGNESIUM)                | 02310252 |
| 5  | JAMP-RISPERIDONE                      | 02359529 | EXTEMPORANEOUS MIXTURE | 99503020 | OMEPRAZOLE (OMEPRAZOLE MAGNESIUM)                | 02310260 |
| 6  | JAMP-RISPERIDONE                      | 02359537 | FLURAZEPAM HCL         | 00496545 | OMEPRAZOLE (OMEPRAZOLE MAGNESIUM)                | 02449919 |
| 7  | JAMP-RISPERIDONE                      | 02359545 | FLURAZEPAM HCL         | 00012696 | OMEPRAZOLE (OMEPRAZOLE MAGNESIUM)                | 02374870 |
| 8  | JAMP-RISPERIDONE                      | 02359553 | FLURAZEPAM HCL         | 00521698 | OMEPRAZOLE (OMEPRAZOLE MAGNESIUM)                | 02260859 |
| 9  | JAMP-RISPERIDONE                      | 02359561 | FLURAZEPAM HCL         | 00483826 | OMEPRAZOLE (OMEPRAZOLE MAGNESIUM)                | 02260867 |
| 10 | JAMP-RISPERIDONE                      | 02359588 | FLURAZEPAM HCL         | 00012718 | OMEPRAZOLE (OMEPRAZOLE MAGNESIUM)                | 02402416 |
| 11 | JAMP-RISPERIDONE                      | 02454319 | FLURAZEPAM HCL         | 00496553 | OMEPRAZOLE (OMEPRAZOLE MAGNESIUM)                | 02331764 |
| 12 | LOXAPINE                              | 02230838 | FLURAZEPAM HCL         | 00521701 | OMEPRAZOLE (OMEPRAZOLE MAGNESIUM)                | 02331772 |
| 13 | LOXAPINE                              | 02230839 | FLURAZEPAM HCL         | 00483818 | OMEPRAZOLE (OMEPRAZOLE MAGNESIUM)                | 02295407 |
| 14 | LOXAPINE                              | 02170000 | FLURAZEPAM HCL         | 00414220 | OMEPRAZOLE (OMEPRAZOLE MAGNESIUM)                | 02295415 |
| 15 | LOXAPINE                              | 00361364 | FLURAZEPAM HCL         | 00414239 | OMEPRAZOLE (OMEPRAZOLE MAGNESIUM)                | 02432404 |
| 16 | LOXAPINE                              | 02230840 | FLURAZEPAM HCL         | 00578479 | OMEPRAZOLE MAGNESIUM                             | 09857536 |
| 17 | LOXAPINE                              | 00439819 | FLURAZEPAM HCL         | 00578487 | OMEPRAZOLE MAGNESIUM                             | 02432404 |
| 18 | LOXAPINE                              | 02169991 | FLURAZEPAM HCL         | 00667099 | OMEPRAZOLE MAGNESIUM                             | 02420198 |
| 19 | LOXAPINE                              | 02230837 | FLURAZEPAM HCL         | 00667102 | OMEPRAZOLE MAGNESIUM                             | 02439549 |
| 20 | LOXAPINE                              | 00217000 | FLURAZEPAM HCL         | 00844698 | OMEPRAZOLE MAGNESIUM                             | 02310260 |
| 21 | LOXAPINE                              | 02239918 | FLURAZEPAM HCL         | 00844701 | OMEPRAZOLE MAGNESIUM                             | 02365677 |
| 22 | LOXAPINE                              | 02239919 | FLURAZEPAM HCL         | 02232656 | OMEPRAZOLE MAGNESIUM                             | 02449919 |
| 23 | LOXAPINE                              | 02239920 | FLURAZEPAM HCL         | 02232657 | OMEPRAZOLE MAGNESIUM                             | 02449927 |
| 24 | LOXAPINE                              | 02242868 | FLURAZEPAM HCL         | 02241281 | PANTOPRAZOLE (PANTOPRAZOLE MAGNESIUM)            | 02441853 |
| 25 | LOXAPINE HCL                          | 02239101 | FLURAZEPAM HCL         | 02241282 | PANTOPRAZOLE (PANTOPRAZOLE MAGNESIUM)            | 02440628 |
| 26 | LOXAPINE HCL                          | 02239921 | FLURAZEPAM HCL         | 02248126 | PANTOPRAZOLE (PANTOPRAZOLE SODIUM SESQUIHYDRATE) | 02386747 |
| 27 | LOXAPINE HCL                          | 02255448 | FLURAZEPAM HCL         | 02248127 | PANTOPRAZOLE (PANTOPRAZOLE SODIUM SESQUIHYDRATE) | 02453401 |
| 28 | LOXAPINE HCL                          | 02255456 | FLURAZEPAM HCL         | 49012696 | PANTOPRAZOLE (PANTOPRAZOLE SODIUM SESQUIHYDRATE) | 02392615 |
| 29 | LOXAPINE HCL IM INJECTION 50MG/ML     | 02232966 | FLURAZEPAM HCL         | 02070901 | PANTOPRAZOLE (PANTOPRAZOLE SODIUM SESQUIHYDRATE) | 02392623 |
| 30 | LOXAPINE HCL ORAL CONCENTRATE 25MG/ML | 02232968 | FLURAZEPAM HCL         | 02070928 | PANTOPRAZOLE (PANTOPRAZOLE SODIUM SESQUIHYDRATE) | 02481561 |
| 31 | LOXAPINE SUCCINATE                    | 02237652 | FLURAZEPAM HCL         | 02128934 | PANTOPRAZOLE (PANTOPRAZOLE SODIUM SESQUIHYDRATE) | 02481588 |
| 32 | LOXAPINE SUCCINATE                    | 02237535 | FLURAZEPAM HCL         | 02128942 | PANTOPRAZOLE (PANTOPRAZOLE SODIUM)               | 02306727 |
| 33 | LOXAPINE SUCCINATE                    | 02170027 | FLURAZEPAM HCL         | 02248126 | PANTOPRAZOLE (PANTOPRAZOLE SODIUM)               | 02441527 |
| 34 | LOXAPINE SUCCINATE                    | 00346799 | FLURAZEPAM HCL         | 02248127 | PANTOPRAZOLE MAGNESIUM                           | 02408570 |
| 35 | LOXAPINE SUCCINATE                    | 00346802 | FLURAZEPAM HCL         | 00012696 | PANTOPRAZOLE MAGNESIUM                           | 02440628 |
| 36 | LOXAPINE SUCCINATE                    | 02170132 | FLURAZEPAM HCL         | 00012718 | PANTOPRAZOLE MAGNESIUM                           | 02441853 |
| 37 | LOXAPINE SUCCINATE                    | 02237653 | FLURAZEPAM HCL         | 00521698 | PANTOPRAZOLE MAGNESIUM                           | 02267233 |
| 38 | LOXAPINE SUCCINATE                    | 02237536 | FLURAZEPAM HCL         | 00521701 | PANTOPRAZOLE MAGNESIUM                           | 02466147 |
| 39 | LOXAPINE SUCCINATE                    | 02237654 | FLURAZEPAM HCL         | 00578479 | PANTOPRAZOLE SODIUM                              | 02428164 |
| 40 | LOXAPINE SUCCINATE                    | 02237537 | FLURAZEPAM HCL         | 02232656 | PANTOPRAZOLE SODIUM                              | 02417448 |
| 41 | LOXAPINE SUCCINATE                    | 02170035 | FLURAZEPAM HCL         | 00578487 | PANTOPRAZOLE SODIUM                              | 02416565 |
| 42 | LOXAPINE SUCCINATE                    | 00346810 | FLURAZEPAM HCL         | 02232657 | PANTOPRAZOLE SODIUM                              | 02415208 |
| 43 | LOXAPINE SUCCINATE                    | 00346780 | FLURAZEPAM HCL         | 00496545 | PANTOPRAZOLE SODIUM                              | 02412969 |
| 44 | LOXAPINE SUCCINATE                    | 02170019 | FLURAZEPAM HCL         | 00496553 | PANTOPRAZOLE SODIUM                              | 02357054 |
| 45 |                                       |          |                        |          |                                                  |          |
| 46 |                                       |          |                        |          |                                                  |          |
| 47 |                                       |          |                        |          |                                                  |          |
| 48 |                                       |          |                        |          |                                                  |          |
| 49 |                                       |          |                        |          |                                                  |          |
| 50 |                                       |          |                        |          |                                                  |          |
| 51 |                                       |          |                        |          |                                                  |          |
| 52 |                                       |          |                        |          |                                                  |          |
| 53 |                                       |          |                        |          |                                                  |          |
| 54 |                                       |          |                        |          |                                                  |          |
| 55 |                                       |          |                        |          |                                                  |          |
| 56 |                                       |          |                        |          |                                                  |          |
| 57 |                                       |          |                        |          |                                                  |          |
| 58 |                                       |          |                        |          |                                                  |          |
| 59 |                                       |          |                        |          |                                                  |          |
| 60 |                                       |          |                        |          |                                                  |          |

1  
2  
3  
4  
5  
6  
7  
8  
9  
10  
11  
12  
13  
14  
15  
16  
17  
18  
19  
20  
21  
22  
23  
24  
25  
26  
27  
28  
29  
30  
31  
32  
33  
34  
35  
36  
37  
38  
39  
40  
41  
42  
43  
44  
45  
46  
47  
48  
49  
50  
51  
52  
53  
54  
55  
56  
57  
58  
59  
60

|                                      |          |                             |          |                     |          |
|--------------------------------------|----------|-----------------------------|----------|---------------------|----------|
| LOXAPINE SUCCINATE                   | 02237651 | FLURAZEPAM HCL              | 00667102 | PANTOPRAZOLE SODIUM | 02437945 |
| LOXAPINE SUCCINATE                   | 02237534 | FLURAZEPAM HCL              | 00667099 | PANTOPRAZOLE SODIUM | 02239616 |
| LOXAPINE SUCCINATE                   | 02236943 | FLURAZEPAM HCL              | 02241281 | PANTOPRAZOLE SODIUM | 00239616 |
| LOXAPINE SUCCINATE                   | 02236944 | FLURAZEPAM HCL              | 02241282 | PANTOPRAZOLE SODIUM | 02308703 |
| LOXAPINE SUCCINATE                   | 02236945 | FLURAZEPAM HCL              | 00414220 | PANTOPRAZOLE SODIUM | 02307871 |
| LOXAPINE SUCCINATE                   | 02236946 | FLURAZEPAM HCL              | 00414239 | PANTOPRAZOLE SODIUM | 02309866 |
| LOXAPINE SUCCINATE                   | 02238196 | FLURAZEPAM HCL              | 00483826 | PANTOPRAZOLE SODIUM | 02301083 |
| LOXAPINE SUCCINATE                   | 02238197 | FLURAZEPAM HCL              | 00483818 | PANTOPRAZOLE SODIUM | 02300486 |
| LOXAPINE SUCCINATE                   | 02238198 | IVABRADINE (IVABRADINE HCL) | 02459973 | PANTOPRAZOLE SODIUM | 02299585 |
| LOXAPINE SUCCINATE                   | 02238199 | IVABRADINE (IVABRADINE HCL) | 02459981 | PANTOPRAZOLE SODIUM | 02292920 |
| LOXAPINE SUCCINATE                   | 02242956 | IVABRADINE HCL              | 02459973 | PANTOPRAZOLE SODIUM | 02285487 |
| LOXAPINE SUCCINATE TABLETS 10MG      | 02232960 | IVABRADINE HCL              | 02459981 | PANTOPRAZOLE SODIUM | 02229453 |
| LOXAPINE SUCCINATE TABLETS 25MG      | 02232961 | KETAZOLAM                   | 00514519 | PANTOPRAZOLE SODIUM | 02305046 |
| LOXAPINE SUCCINATE TABLETS 5 MG      | 02232938 | KETAZOLAM                   | 00514527 | PANTOPRAZOLE SODIUM | 02244730 |
| LOXAPINE SUCCINATE TABLETS 50MG      | 02232962 | KETAZOLAM                   | 00559245 | PANTOPRAZOLE SODIUM | 02285479 |
| LOXAPINE-10                          | 02238197 | KETAZOLAM                   | 01919512 | PANTOPRAZOLE SODIUM | 02291665 |
| LOXAPINE-25                          | 02238198 | KETAZOLAM                   | 01919520 | PANTOPRAZOLE SODIUM | 02292912 |
| LOXAPINE-5                           | 02238196 | LORAZEPAM                   | 00865672 | PANTOPRAZOLE SODIUM | 02294656 |
| LOXAPINE-50                          | 02238199 | LORAZEPAM                   | 02041413 | PANTOPRAZOLE SODIUM | 02294672 |
| MAR-OLANZAPINE                       | 02421232 | LORAZEPAM                   | 00728187 | PANTOPRAZOLE SODIUM | 02301075 |
| MAR-OLANZAPINE                       | 02421240 | LORAZEPAM                   | 00399124 | PANTOPRAZOLE SODIUM | 02305038 |
| MAR-OLANZAPINE                       | 02421259 | LORAZEPAM                   | 00711101 | PANTOPRAZOLE SODIUM | 02306727 |
| MAR-OLANZAPINE                       | 02421267 | LORAZEPAM                   | 00655740 | PANTOPRAZOLE SODIUM | 02307863 |
| MAR-OLANZAPINE                       | 02421275 | LORAZEPAM                   | 02041456 | PANTOPRAZOLE SODIUM | 02308681 |
| MAR-OLANZAPINE                       | 02421283 | LORAZEPAM                   | 00722138 | PANTOPRAZOLE SODIUM | 02309858 |
| MAR-OLANZAPINE ODT                   | 02389088 | LORAZEPAM                   | 02410753 | PANTOPRAZOLE SODIUM | 02309998 |
| MAR-OLANZAPINE ODT                   | 02389096 | LORAZEPAM                   | 00865680 | PANTOPRAZOLE SODIUM | 02310007 |
| MAR-OLANZAPINE ODT                   | 02389118 | LORAZEPAM                   | 02041421 | PANTOPRAZOLE SODIUM | 02310198 |
| MAR-OLANZAPINE ODT                   | 02389126 | LORAZEPAM                   | 00728195 | PANTOPRAZOLE SODIUM | 02310201 |
| MAR-RISPERIDONE                      | 02371766 | LORAZEPAM                   | 00348325 | PANTOPRAZOLE SODIUM | 02316455 |
| MAR-RISPERIDONE                      | 02371774 | LORAZEPAM                   | 00637742 | PANTOPRAZOLE SODIUM | 02316463 |
| MAR-RISPERIDONE                      | 02371782 | LORAZEPAM                   | 00655759 | PANTOPRAZOLE SODIUM | 02318687 |
| MAR-RISPERIDONE                      | 02371790 | LORAZEPAM                   | 00557757 | PANTOPRAZOLE SODIUM | 02318695 |
| MAR-RISPERIDONE                      | 02371804 | LORAZEPAM                   | 02041464 | PANTOPRAZOLE SODIUM | 02328704 |
| MAR-RISPERIDONE                      | 02371812 | LORAZEPAM                   | 02410761 | PANTOPRAZOLE SODIUM | 02330709 |
| MESORIDAZINE (MESORIDAZINE BESYLATE) | 00027464 | LORAZEPAM                   | 00865699 | PANTOPRAZOLE SODIUM | 02334658 |
| MESORIDAZINE (MESORIDAZINE BESYLATE) | 00027456 | LORAZEPAM                   | 02041448 | PANTOPRAZOLE SODIUM | 02334666 |
| MESORIDAZINE (MESORIDAZINE BESYLATE) | 00027448 | LORAZEPAM                   | 00728209 | PANTOPRAZOLE SODIUM | 02336308 |
| MESORIDAZINE BESYLATE                | 00027448 | LORAZEPAM                   | 00348333 | PANTOPRAZOLE SODIUM | 02339072 |
| MESORIDAZINE BESYLATE                | 00259489 | LORAZEPAM                   | 00655767 | PANTOPRAZOLE SODIUM | 02340097 |
| MESORIDAZINE BESYLATE                | 00027456 | LORAZEPAM                   | 00637750 | PANTOPRAZOLE SODIUM | 02343789 |
| MESORIDAZINE BESYLATE                | 00027464 | LORAZEPAM                   | 00557765 | PANTOPRAZOLE SODIUM | 02352214 |
| METHOTRIMEPRAZINE                    | 02232904 | LORAZEPAM                   | 02041472 | PANTOPRAZOLE SODIUM | 02354179 |

|    |                                             |          |           |          |                     |          |
|----|---------------------------------------------|----------|-----------|----------|---------------------|----------|
| 1  |                                             |          |           |          |                     |          |
| 2  | METHOTRIMEPAZINE                            | 01927728 | LORAZEPAM | 02041405 | PANTOPRAZOLE SODIUM | 02358867 |
| 3  |                                             |          |           |          |                     |          |
| 4  | METHOTRIMEPAZINE                            | 02232905 | LORAZEPAM | 00557773 | PANTOPRAZOLE SODIUM | 02358875 |
| 5  | METHOTRIMEPAZINE                            | 02232903 | LORAZEPAM | 09857216 | PANTOPRAZOLE SODIUM | 02363410 |
| 6  | METHOTRIMEPAZINE                            | 00903463 | LORAZEPAM | 02243278 | PANTOPRAZOLE SODIUM | 02363429 |
| 7  |                                             |          |           |          |                     |          |
| 8  | METHOTRIMEPAZINE                            | 22123112 | LORAZEPAM | 00655643 | PANTOPRAZOLE SODIUM | 02370808 |
| 9  | METHOTRIMEPAZINE                            | 22123124 | LORAZEPAM | 00655651 | PANTOPRAZOLE SODIUM | 02385740 |
| 10 | METHOTRIMEPAZINE                            | 22123130 | LORAZEPAM | 00655678 | PANTOPRAZOLE SODIUM | 02385759 |
| 11 | METHOTRIMEPAZINE                            | 22123189 | LORAZEPAM | 02240725 | PANTOPRAZOLE SODIUM | 02408414 |
| 12 |                                             |          |           |          |                     |          |
| 13 | METHOTRIMEPAZINE                            | 99100694 | LORAZEPAM | 02240726 | PANTOPRAZOLE SODIUM | 02416557 |
| 14 | METHOTRIMEPAZINE                            | 99100837 | LORAZEPAM | 02240727 | PANTOPRAZOLE SODIUM | 02425378 |
| 15 | METHOTRIMEPAZINE                            | 99100838 | LORAZEPAM | 02245784 | PANTOPRAZOLE SODIUM | 02428172 |
| 16 |                                             |          |           |          |                     |          |
| 17 | METHOTRIMEPAZINE (METHOTRIMEPAZINE HCL)     | 01927728 | LORAZEPAM | 02245785 | PANTOPRAZOLE SODIUM | 02428180 |
| 18 | METHOTRIMEPAZINE (METHOTRIMEPAZINE HCL)     | 01927698 | LORAZEPAM | 02245786 | PANTOPRAZOLE SODIUM | 02431327 |
| 19 | METHOTRIMEPAZINE (METHOTRIMEPAZINE HCL)     | 01927701 | LORAZEPAM | 02280477 | PANTOPRAZOLE SODIUM | 02439107 |
| 20 | METHOTRIMEPAZINE (METHOTRIMEPAZINE MALEATE) | 02238403 | LORAZEPAM | 02280485 | PANTOPRAZOLE SODIUM | 02441527 |
| 21 | METHOTRIMEPAZINE (METHOTRIMEPAZINE MALEATE) | 02238404 | LORAZEPAM | 02298201 | PANTOPRAZOLE SODIUM | 02445867 |
| 22 | METHOTRIMEPAZINE (METHOTRIMEPAZINE MALEATE) | 02238405 | LORAZEPAM | 02298228 | PANTOPRAZOLE SODIUM | 02458969 |
| 23 | METHOTRIMEPAZINE (METHOTRIMEPAZINE MALEATE) | 02238406 | LORAZEPAM | 02298236 | PANTOPRAZOLE SODIUM | 02467372 |
| 24 | METHOTRIMEPAZINE (METHOTRIMEPAZINE MALEATE) | 01964933 | LORAZEPAM | 02347733 | PANTOPRAZOLE SODIUM | 02469138 |
| 25 | METHOTRIMEPAZINE (METHOTRIMEPAZINE MALEATE) | 01964925 | LORAZEPAM | 02347741 | PANTOPRAZOLE SODIUM | 02471825 |
| 26 | METHOTRIMEPAZINE (METHOTRIMEPAZINE MALEATE) | 01964909 | LORAZEPAM | 02347768 | PANTOPRAZOLE SODIUM | 02478781 |
| 27 | METHOTRIMEPAZINE (METHOTRIMEPAZINE MALEATE) | 01927655 | LORAZEPAM | 02351072 | PANTOPRAZOLE SODIUM | 82229453 |
| 28 | METHOTRIMEPAZINE (METHOTRIMEPAZINE MALEATE) | 01927663 | LORAZEPAM | 02351080 | RABEPRAZOLE SODIUM  | 02422638 |
| 29 | METHOTRIMEPAZINE (METHOTRIMEPAZINE MALEATE) | 01927647 | LORAZEPAM | 02351099 | RABEPRAZOLE SODIUM  | 02320614 |
| 30 | METHOTRIMEPAZINE (METHOTRIMEPAZINE MALEATE) | 01927671 | LORAZEPAM | 02388669 | RABEPRAZOLE SODIUM  | 02298074 |
| 31 | METHOTRIMEPAZINE (METHOTRIMEPAZINE MALEATE) | 02241197 | LORAZEPAM | 02410745 | RABEPRAZOLE SODIUM  | 02296632 |
| 32 | METHOTRIMEPAZINE (METHOTRIMEPAZINE MALEATE) | 02241198 | LORAZEPAM | 02429810 | RABEPRAZOLE SODIUM  | 02408392 |
| 33 | METHOTRIMEPAZINE (METHOTRIMEPAZINE MALEATE) | 02241199 | LORAZEPAM | 02429829 | RABEPRAZOLE SODIUM  | 02345579 |
| 34 | METHOTRIMEPAZINE HCL                        | 01927698 | LORAZEPAM | 02438704 | RABEPRAZOLE SODIUM  | 02356511 |
| 35 |                                             |          |           |          |                     |          |
| 36 | METHOTRIMEPAZINE HCL                        | 00025003 | LORAZEPAM | 05022457 | RABEPRAZOLE SODIUM  | 02381737 |
| 37 |                                             |          |           |          |                     |          |
| 38 | METHOTRIMEPAZINE HCL                        | 00025194 | LORAZEPAM | 22123248 | RABEPRAZOLE SODIUM  | 02314177 |
| 39 | METHOTRIMEPAZINE HCL                        | 00025208 | LORAZEPAM | 49348325 | RABEPRAZOLE SODIUM  | 02310805 |
| 40 |                                             |          |           |          |                     |          |
| 41 | METHOTRIMEPAZINE HCL                        | 01927701 | LORAZEPAM | 80637742 | RABEPRAZOLE SODIUM  | 02243796 |
| 42 | METHOTRIMEPAZINE MALEATE                    | 01964925 | LORAZEPAM | 80711101 | RABEPRAZOLE SODIUM  | 02422646 |
| 43 | METHOTRIMEPAZINE MALEATE                    | 01927663 | LORAZEPAM | 00655740 | RABEPRAZOLE SODIUM  | 02320622 |
| 44 | METHOTRIMEPAZINE MALEATE                    | 00025593 | LORAZEPAM | 00655759 | RABEPRAZOLE SODIUM  | 02298082 |
| 45 | METHOTRIMEPAZINE MALEATE                    | 02238405 | LORAZEPAM | 00655767 | RABEPRAZOLE SODIUM  | 02296640 |
| 46 | METHOTRIMEPAZINE MALEATE                    | 02238403 | LORAZEPAM | 02245784 | RABEPRAZOLE SODIUM  | 02408406 |
| 47 | METHOTRIMEPAZINE MALEATE                    | 00025577 | LORAZEPAM | 02245785 | RABEPRAZOLE SODIUM  | 02345587 |
| 48 |                                             |          |           |          |                     |          |
| 49 | METHOTRIMEPAZINE MALEATE                    | 01927647 | LORAZEPAM | 02245786 | RABEPRAZOLE SODIUM  | 02356538 |
| 50 | METHOTRIMEPAZINE MALEATE                    | 01964933 | LORAZEPAM | 02351072 | RABEPRAZOLE SODIUM  | 02381745 |
| 51 | METHOTRIMEPAZINE MALEATE                    | 01927671 | LORAZEPAM | 02351080 | RABEPRAZOLE SODIUM  | 02314185 |
| 52 | METHOTRIMEPAZINE MALEATE                    | 00025607 | LORAZEPAM | 02351099 | RABEPRAZOLE SODIUM  | 02310813 |
| 53 |                                             |          |           |          |                     |          |
| 54 |                                             |          |           |          |                     |          |
| 55 |                                             |          |           |          |                     |          |
| 56 |                                             |          |           |          |                     |          |
| 57 |                                             |          |           |          |                     |          |
| 58 |                                             |          |           |          |                     |          |
| 59 |                                             |          |           |          |                     |          |
| 60 |                                             |          |           |          |                     |          |

1  
2  
3  
4  
5  
6  
7  
8  
9  
10  
11  
12  
13  
14  
15  
16  
17  
18  
19  
20  
21  
22  
23  
24  
25  
26  
27  
28  
29  
30  
31  
32  
33  
34  
35  
36  
37  
38  
39  
40  
41  
42  
43  
44  
45  
46  
47  
48  
49  
50  
51  
52  
53  
54  
55  
56  
57  
58  
59  
60

|                           |          |           |          |                    |          |
|---------------------------|----------|-----------|----------|--------------------|----------|
| METHOTRIMEPRAZINE MALEATE | 02238406 | LORAZEPAM | 02429802 | RABEPRAZOLE SODIUM | 02243797 |
| METHOTRIMEPRAZINE MALEATE | 02238404 | LORAZEPAM | 02429810 | RABEPRAZOLE SODIUM | 02315181 |
| METHOTRIMEPRAZINE MALEATE | 00025585 | LORAZEPAM | 02429829 | RABEPRAZOLE SODIUM | 02315203 |
| METHOTRIMEPRAZINE MALEATE | 01964909 | LORAZEPAM | 02243278 | RABEPRAZOLE SODIUM | 02320452 |
| METHOTRIMEPRAZINE MALEATE | 01927655 | LORAZEPAM | 02388669 | RABEPRAZOLE SODIUM | 02320460 |
| METHOTRIMEPRAZINE MALEATE | 00927647 | LORAZEPAM | 02438704 | RABEPRAZOLE SODIUM | 02320592 |
| METHOTRIMEPRAZINE MALEATE | 00927655 | LORAZEPAM | 02410745 | RABEPRAZOLE SODIUM | 02320606 |
| METHOTRIMEPRAZINE MALEATE | 00927663 | LORAZEPAM | 02410753 | RABEPRAZOLE SODIUM | 02330083 |
| METHOTRIMEPRAZINE MALEATE | 00927671 | LORAZEPAM | 02410761 | RABEPRAZOLE SODIUM | 02330091 |
| METHOTRIMEPRAZINE MALEATE | 02239632 | LORAZEPAM | 02347733 | RABEPRAZOLE SODIUM | 02335166 |
| METHOTRIMEPRAZINE MALEATE | 02239633 | LORAZEPAM | 02347741 | RABEPRAZOLE SODIUM | 02335174 |
| METHOTRIMEPRAZINE MALEATE | 02239634 | LORAZEPAM | 02347768 | RABEPRAZOLE SODIUM | 02345994 |
| METHOTRIMEPRAZINE MALEATE | 02239635 | LORAZEPAM | 02298201 | RABEPRAZOLE SODIUM | 02346001 |
| METHOTRIMEPRAZINE MALEATE | 02241197 | LORAZEPAM | 02298228 | RABEPRAZOLE SODIUM | 02370719 |
| METHOTRIMEPRAZINE MALEATE | 02241198 | LORAZEPAM | 02298236 | RABEPRAZOLE SODIUM | 02370727 |
| METHOTRIMEPRAZINE MALEATE | 02241199 | LORAZEPAM | 00728187 | RABEPRAZOLE SODIUM | 02385449 |
| METHOTRIMEPRAZINE-2       | 02239632 | LORAZEPAM | 00728195 | RABEPRAZOLE SODIUM | 02385457 |
| METHOTRIMEPRAZINE-25      | 02239634 | LORAZEPAM | 00728209 | RABEPRAZOLE SODIUM | 03205920 |
| METHOTRIMEPRAZINE-5       | 02239633 | LORAZEPAM | 00655643 | RABEPRAZOLE SODIUM | 24084060 |
| METHOTRIMEPRAZINE-50      | 02239635 | LORAZEPAM | 00655651 | RABEPRAZOLE SODIUM | 02422638 |
| MINT-ARIPIRAZOLE          | 02483556 | LORAZEPAM | 00655678 | RABEPRAZOLE SODIUM | 02422646 |
| MINT-ARIPIRAZOLE          | 02483564 | LORAZEPAM | 02240725 | RABEPRAZOLE SODIUM | 02484161 |
| MINT-ARIPIRAZOLE          | 02483572 | LORAZEPAM | 02240726 | RABEPRAZOLE SODIUM | 02484188 |
| MINT-ARIPIRAZOLE          | 02483580 | LORAZEPAM | 02240727 | RABEPRAZOLE SODIUM | 02345579 |
| MINT-ARIPIRAZOLE          | 02483599 | LORAZEPAM | 00637742 | RABEPRAZOLE SODIUM | 02345587 |
| MINT-ARIPIRAZOLE          | 02483602 | LORAZEPAM | 00637750 | RABEPRAZOLE SODIUM | 02320452 |
| MINT-OLANZAPINE           | 02410141 | LORAZEPAM | 00711101 | RABEPRAZOLE SODIUM | 02320460 |
| MINT-OLANZAPINE           | 02410168 | MIDAZOLAM | 02243254 | RABEPRAZOLE SODIUM | 02415283 |
| MINT-OLANZAPINE           | 02410176 | MIDAZOLAM | 02382342 | RABEPRAZOLE SODIUM | 02415291 |
| MINT-OLANZAPINE           | 02410184 | MIDAZOLAM | 02382350 | RABEPRAZOLE SODIUM | 02408392 |
| MINT-OLANZAPINE           | 02410192 | MIDAZOLAM | 02382377 | RABEPRAZOLE SODIUM | 02408406 |
| MINT-OLANZAPINE           | 02410206 | MIDAZOLAM | 02382385 | RABEPRAZOLE SODIUM | 02345994 |
| MINT-OLANZAPINE ODT       | 02436965 | MIDAZOLAM | 02240285 | RABEPRAZOLE SODIUM | 02346001 |
| MINT-OLANZAPINE ODT       | 02436973 | MIDAZOLAM | 02240286 | RABEPRAZOLE SODIUM | 02243796 |
| MINT-OLANZAPINE ODT       | 02436981 | MIDAZOLAM | 02242904 | RABEPRAZOLE SODIUM | 02243797 |
| MINT-OLANZAPINE ODT       | 02437007 | MIDAZOLAM | 02242905 | RABEPRAZOLE SODIUM | 02381737 |
| MYLAN-OLANZAPINE          | 02337878 | MIDAZOLAM | 02423758 | RABEPRAZOLE SODIUM | 02381745 |
| MYLAN-OLANZAPINE          | 02337886 | MIDAZOLAM | 02423766 | RABEPRAZOLE SODIUM | 02310805 |
| MYLAN-OLANZAPINE          | 02337894 | MIDAZOLAM | 02382873 | RABEPRAZOLE SODIUM | 02310813 |
| MYLAN-OLANZAPINE          | 02337908 | MIDAZOLAM | 02382903 | RABEPRAZOLE SODIUM | 02315181 |
| MYLAN-OLANZAPINE          | 02337916 | MIDAZOLAM | 02382342 | RABEPRAZOLE SODIUM | 02315203 |
| MYLAN-OLANZAPINE          | 02337924 | MIDAZOLAM | 02382350 | RABEPRAZOLE SODIUM | 02385449 |
| MYLAN-OLANZAPINE ODT      | 02382709 | MIDAZOLAM | 02382377 | RABEPRAZOLE SODIUM | 02385457 |



|    |                              |          |                           |          |                             |          |
|----|------------------------------|----------|---------------------------|----------|-----------------------------|----------|
| 1  | MYLAN-OLANZAPINE ODT         | 02382717 | MIDAZOLAM                 | 02382385 | RABEPRAZOLE SODIUM          | 02320614 |
| 2  | MYLAN-OLANZAPINE ODT         | 02382725 | MIDAZOLAM (MIDAZOLAM HCL) | 02243253 | RABEPRAZOLE SODIUM          | 02320622 |
| 3  | MYLAN-OLANZAPINE ODT         | 02382733 | MIDAZOLAM (MIDAZOLAM HCL) | 02243254 | RABEPRAZOLE SODIUM          | 02356511 |
| 4  | MYLAN-RISPERIDONE            | 02282240 | MIDAZOLAM (MIDAZOLAM HCL) | 02243934 | RABEPRAZOLE SODIUM          | 02356538 |
| 5  | MYLAN-RISPERIDONE            | 02282259 | MIDAZOLAM (MIDAZOLAM HCL) | 02243935 | RABEPRAZOLE SODIUM          | 02298074 |
| 6  | MYLAN-RISPERIDONE            | 02282267 | MIDAZOLAM (MIDAZOLAM HCL) | 02383586 | RABEPRAZOLE SODIUM          | 02298082 |
| 7  | MYLAN-RISPERIDONE            | 02282275 | MIDAZOLAM (MIDAZOLAM HCL) | 02383594 | RABEPRAZOLE SODIUM          | 02419785 |
| 8  | MYLAN-RISPERIDONE            | 02282283 | MIDAZOLAM (MIDAZOLAM HCL) | 02241753 | RABEPRAZOLE SODIUM          | 02419793 |
| 9  | MYLAN-RISPERIDONE            | 02282291 | MIDAZOLAM (MIDAZOLAM HCL) | 02241754 | RABEPRAZOLE SODIUM          | 02330083 |
| 10 | MYLAN-RISPERIDONE ODT        | 02413485 | MIDAZOLAM (MIDAZOLAM HCL) | 02242653 | RABEPRAZOLE SODIUM          | 02330091 |
| 11 | MYLAN-RISPERIDONE ODT        | 02413493 | MIDAZOLAM (MIDAZOLAM HCL) | 02242654 | RABEPRAZOLE SODIUM          | 02314177 |
| 12 | MYLAN-RISPERIDONE ODT        | 02413507 | MIDAZOLAM HCL             | 02240285 | RABEPRAZOLE SODIUM          | 02314185 |
| 13 | MYLAN-RISPERIDONE ODT        | 02413515 | MIDAZOLAM HCL             | 00784516 | RABEPRAZOLE SODIUM          | 02296632 |
| 14 | MYLAN-RISPERIDONE ODT        | 02413523 | MIDAZOLAM HCL             | 00766011 | RABEPRAZOLE SODIUM          | 02296640 |
| 15 | NOVO-CHLORPROMAZINE 200MG    | 00021342 | MIDAZOLAM HCL             | 09857438 | RANITIDINE                  | 00740756 |
| 16 | NOVO-CHLORPROMAZINE TAB 10MG | 00232157 | MIDAZOLAM HCL             | 09857437 | RANITIDINE                  | 02385961 |
| 17 | NTP-OLANZAPINE               | 02346044 | MIDAZOLAM HCL             | 09857436 | RANITIDINE (RANITIDINE HCL) | 02407523 |
| 18 | NTP-OLANZAPINE               | 02346052 | MIDAZOLAM HCL             | 09857225 | RANITIDINE (RANITIDINE HCL) | 02452464 |
| 19 | NTP-OLANZAPINE               | 02346060 | MIDAZOLAM HCL             | 02242905 | RANITIDINE (RANITIDINE HCL) | 02248570 |
| 20 | NTP-OLANZAPINE               | 02346079 | MIDAZOLAM HCL             | 02240286 | RANITIDINE (RANITIDINE HCL) | 02248571 |
| 21 | NTP-OLANZAPINE               | 02346087 | MIDAZOLAM HCL             | 02241753 | RANITIDINE (RANITIDINE HCL) | 02484501 |
| 22 | NU-HALOPERIDOL               | 02239216 | MIDAZOLAM HCL             | 02241754 | RANITIDINE (RANITIDINE HCL) | 02484528 |
| 23 | NU-HALOPERIDOL               | 02239217 | MIDAZOLAM HCL             | 02242653 | RANITIDINE (RANITIDINE HCL) | 02280833 |
| 24 | NU-HALOPERIDOL               | 02239218 | MIDAZOLAM HCL             | 02242654 | RANITIDINE (RANITIDINE HCL) | 00733059 |
| 25 | NU-HALOPERIDOL               | 02239219 | MIDAZOLAM HCL             | 02242904 | RANITIDINE (RANITIDINE HCL) | 00733067 |
| 26 | NU-HALOPERIDOL               | 02239220 | MIDAZOLAM HCL             | 02243253 | RANITIDINE (RANITIDINE HCL) | 02265591 |
| 27 | NU-LOXAPINE                  | 02237534 | MIDAZOLAM HCL             | 02243934 | RANITIDINE (RANITIDINE HCL) | 02265605 |
| 28 | NU-LOXAPINE                  | 02237535 | MIDAZOLAM HCL             | 02243935 | RANITIDINE (RANITIDINE HCL) | 02243038 |
| 29 | NU-LOXAPINE                  | 02237536 | MIDAZOLAM HCL             | 02244788 | RANITIDINE (RANITIDINE HCL) | 02243039 |
| 30 | NU-LOXAPINE                  | 02237537 | MIDAZOLAM HCL             | 02244789 | RANITIDINE (RANITIDINE HCL) | 02463717 |
| 31 | NU-OLANZAPINE                | 02310015 | MIDAZOLAM HCL             | 02382873 | RANITIDINE (RANITIDINE HCL) | 02463725 |
| 32 | NU-OLANZAPINE                | 02310031 | MIDAZOLAM HCL             | 02382903 | RANITIDINE (RANITIDINE HCL) | 02473534 |
| 33 | NU-OLANZAPINE                | 02310058 | MIDAZOLAM HCL             | 02423758 | RANITIDINE (RANITIDINE HCL) | 02473542 |
| 34 | NU-OLANZAPINE                | 02310082 | MIDAZOLAM HCL             | 02423766 | RANITIDINE (RANITIDINE HCL) | 02443708 |
| 35 | NU-OLANZAPINE                | 02310090 | MIDAZOLAM HCL             | 99100865 | RANITIDINE (RANITIDINE HCL) | 02443716 |
| 36 | NU-RISPERIDONE               | 02334372 | NITRAZEPAM                | 02234007 | RANITIDINE (RANITIDINE HCL) | 02367378 |
| 37 | NU-RISPERIDONE               | 02334380 | NITRAZEPAM                | 02245231 | RANITIDINE (RANITIDINE HCL) | 02367386 |
| 38 | NU-RISPERIDONE               | 02334399 | NITRAZEPAM                | 02229655 | RANITIDINE (RANITIDINE HCL) | 02207761 |
| 39 | NU-RISPERIDONE               | 02334402 | NITRAZEPAM                | 00511536 | RANITIDINE (RANITIDINE HCL) | 02207788 |
| 40 | NU-RISPERIDONE               | 02334410 | NITRAZEPAM                | 00511528 | RANITIDINE (RANITIDINE HCL) | 02245782 |
| 41 | NU-RISPERIDONE               | 02334429 | NITRAZEPAM                | 02234003 | RANITIDINE (RANITIDINE HCL) | 02245783 |
| 42 | OLANZAPINE                   | 02414546 | NITRAZEPAM                | 02245230 | RANITIDINE (RANITIDINE HCL) | 02242453 |
| 43 | OLANZAPINE                   | 02325683 | NITRAZEPAM                | 02229654 | RANITIDINE (RANITIDINE HCL) | 02242454 |

1  
2  
3  
4  
5  
6  
7  
8  
9  
10  
11  
12  
13  
14  
15  
16  
17  
18  
19  
20  
21  
22  
23  
24  
25  
26  
27  
28  
29  
30  
31  
32  
33  
34  
35  
36  
37  
38  
39  
40  
41  
42  
43  
44  
45  
46  
47  
48  
49  
50  
51  
52  
53  
54  
55  
56  
57  
58  
59  
60

|            |          |            |          |                             |          |
|------------|----------|------------|----------|-----------------------------|----------|
| OLANZAPINE | 02372843 | NITRAZEPAM | 00903215 | RANITIDINE (RANITIDINE HCL) | 02336480 |
| OLANZAPINE | 02403099 | NITRAZEPAM | 02200961 | RANITIDINE (RANITIDINE HCL) | 02336502 |
| OLANZAPINE | 02337908 | NITRAZEPAM | 02200988 | RANITIDINE (RANITIDINE HCL) | 02245615 |
| OLANZAPINE | 02307448 | NITRAZEPAM | 02255561 | RANITIDINE (RANITIDINE HCL) | 02286106 |
| OLANZAPINE | 02310384 | NITRAZEPAM | 02255588 | RANITIDINE (RANITIDINE HCL) | 02286114 |
| OLANZAPINE | 02303175 | NITRAZEPAM | 22296655 | RANITIDINE (RANITIDINE HCL) | 02303353 |
| OLANZAPINE | 02281821 | NITRAZEPAM | 99101127 | RANITIDINE (RANITIDINE HCL) | 02303388 |
| OLANZAPINE | 02276747 | NITRAZEPAM | 02245230 | RANITIDINE (RANITIDINE HCL) | 02343436 |
| OLANZAPINE | 02229285 | NITRAZEPAM | 02245231 | RANITIDINE (RANITIDINE HCL) | 02343444 |
| OLANZAPINE | 02243087 | NITRAZEPAM | 02255588 | RANITIDINE (RANITIDINE HCL) | 02353016 |
| OLANZAPINE | 02303205 | NITRAZEPAM | 02255561 | RANITIDINE (RANITIDINE HCL) | 02353024 |
| OLANZAPINE | 02414104 | NITRAZEPAM | 02234003 | RANITIDINE (RANITIDINE HCL) | 02385953 |
| OLANZAPINE | 02321351 | NITRAZEPAM | 02234007 | RANITIDINE (RANITIDINE HCL) | 02385961 |
| OLANZAPINE | 02406632 | OXAZEPAM   | 02043653 | RANITIDINE (RANITIDINE HCL) | 00740748 |
| OLANZAPINE | 02327783 | OXAZEPAM   | 00500852 | RANITIDINE (RANITIDINE HCL) | 00740756 |
| OLANZAPINE | 02327570 | OXAZEPAM   | 00483893 | RANITIDINE (RANITIDINE HCL) | 02256711 |
| OLANZAPINE | 02389096 | OXAZEPAM   | 00402680 | RANITIDINE (RANITIDINE HCL) | 02368005 |
| OLANZAPINE | 02360624 | OXAZEPAM   | 00295701 | RANITIDINE (RANITIDINE HCL) | 02350203 |
| OLANZAPINE | 02382717 | OXAZEPAM   | 00496529 | RANITIDINE (RANITIDINE HCL) | 02350211 |
| OLANZAPINE | 02428032 | OXAZEPAM   | 00483915 | RANITIDINE (RANITIDINE HCL) | 02230003 |
| OLANZAPINE | 02421267 | OXAZEPAM   | 00402745 | RANITIDINE (RANITIDINE HCL) | 02230004 |
| OLANZAPINE | 02417286 | OXAZEPAM   | 00295698 | RANITIDINE (RANITIDINE HCL) | 00828688 |
| OLANZAPINE | 02436973 | OXAZEPAM   | 02043661 | RANITIDINE (RANITIDINE HCL) | 00828823 |
| OLANZAPINE | 02448734 | OXAZEPAM   | 02043688 | RANITIDINE (RANITIDINE HCL) | 02247814 |
| OLANZAPINE | 02325691 | OXAZEPAM   | 00496537 | RANITIDINE (RANITIDINE HCL) | 02247815 |
| OLANZAPINE | 02372851 | OXAZEPAM   | 00483907 | RANITIDINE (RANITIDINE HCL) | 02238579 |
| OLANZAPINE | 02403102 | OXAZEPAM   | 00402737 | RANITIDINE (RANITIDINE HCL) | 02243229 |
| OLANZAPINE | 02337916 | OXAZEPAM   | 00231363 | RANITIDINE (RANITIDINE HCL) | 02243230 |
| OLANZAPINE | 02310392 | OXAZEPAM   | 00414247 | RANITIDINE (RANITIDINE HCL) | 02241598 |
| OLANZAPINE | 02303183 | OXAZEPAM   | 00414255 | RANITIDINE (RANITIDINE HCL) | 02241599 |
| OLANZAPINE | 02238850 | OXAZEPAM   | 00414263 | RANITIDINE (RANITIDINE HCL) | 00828556 |
| OLANZAPINE | 02281848 | OXAZEPAM   | 00497754 | RANITIDINE (RANITIDINE HCL) | 00828564 |
| OLANZAPINE | 02276755 | OXAZEPAM   | 00497762 | RANITIDINE (RANITIDINE HCL) | 02231487 |
| OLANZAPINE | 02243088 | OXAZEPAM   | 00497770 | RANITIDINE (RANITIDINE HCL) | 02242940 |
| OLANZAPINE | 02303213 | OXAZEPAM   | 00568392 | RANITIDINE (RANITIDINE HCL) | 02229562 |
| OLANZAPINE | 02321378 | OXAZEPAM   | 00568406 | RANITIDINE (RANITIDINE HCL) | 02229563 |
| OLANZAPINE | 02406640 | OXAZEPAM   | 00568414 | RANITIDINE HCL              | 02367378 |
| OLANZAPINE | 02360632 | OXAZEPAM   | 00702745 | RANITIDINE HCL              | 02336480 |
| OLANZAPINE | 02327791 | OXAZEPAM   | 00726362 | RANITIDINE HCL              | 02243229 |
| OLANZAPINE | 02327589 | OXAZEPAM   | 00726370 | RANITIDINE HCL              | 02242453 |
| OLANZAPINE | 02389118 | OXAZEPAM   | 00726389 | RANITIDINE HCL              | 02241598 |
| OLANZAPINE | 02382725 | OXAZEPAM   | 00903599 | RANITIDINE HCL              | 02248570 |
| OLANZAPINE | 02428040 | OXAZEPAM   | 02232721 | RANITIDINE HCL              | 02230003 |

|    |            |          |           |          |                |          |
|----|------------|----------|-----------|----------|----------------|----------|
| 1  |            |          |           |          |                |          |
| 2  | OLANZAPINE | 02421275 | OXAZEPAM  | 02232727 | RANITIDINE HCL | 00865737 |
| 3  |            |          |           |          |                |          |
| 4  | OLANZAPINE | 02417294 | OXAZEPAM  | 02232732 | RANITIDINE HCL | 00828823 |
| 5  | OLANZAPINE | 02414112 | OXAZEPAM  | 02247177 | RANITIDINE HCL | 00828564 |
| 6  | OLANZAPINE | 02448742 | OXAZEPAM  | 02247178 | RANITIDINE HCL | 00733059 |
| 7  |            |          |           |          |                |          |
| 8  | OLANZAPINE | 02436981 | OXAZEPAM  | 02247179 | RANITIDINE HCL | 02212331 |
| 9  | OLANZAPINE | 02325659 | OXAZEPAM  | 02253968 | RANITIDINE HCL | 02207761 |
| 10 | OLANZAPINE | 02372819 | OXAZEPAM  | 02253976 | RANITIDINE HCL | 00553379 |
| 11 | OLANZAPINE | 02403064 | OXAZEPAM  | 02253984 | RANITIDINE HCL | 00905992 |
| 12 |            |          |           |          |                |          |
| 13 | OLANZAPINE | 02337878 | OXAZEPAM  | 02294079 | RANITIDINE HCL | 02212374 |
| 14 | OLANZAPINE | 02310341 | OXAZEPAM  | 02294087 | RANITIDINE HCL | 00782386 |
| 15 | OLANZAPINE | 02307405 | OXAZEPAM  | 02294095 | RANITIDINE HCL | 02242940 |
| 16 |            |          |           |          |                |          |
| 17 | OLANZAPINE | 02303116 | OXAZEPAM  | 80402680 | RANITIDINE HCL | 02280833 |
| 18 | OLANZAPINE | 02281791 | OXAZEPAM  | 80402745 | RANITIDINE HCL | 02212366 |
| 19 | OLANZAPINE | 02276712 | OXAZEPAM  | 00402680 | RANITIDINE HCL | 00603791 |
| 20 | OLANZAPINE | 02229250 | OXAZEPAM  | 00402745 | RANITIDINE HCL | 02256711 |
| 21 |            |          |           |          |                |          |
| 22 | OLANZAPINE | 02428008 | OXAZEPAM  | 00402737 | RANITIDINE HCL | 02243230 |
| 23 | OLANZAPINE | 02421232 | OXAZEPAM  | 02247177 | RANITIDINE HCL | 02242454 |
| 24 | OLANZAPINE | 02417243 | OXAZEPAM  | 02247178 | RANITIDINE HCL | 02241599 |
| 25 |            |          |           |          |                |          |
| 26 | OLANZAPINE | 02414538 | OXAZEPAM  | 02247179 | RANITIDINE HCL | 02248571 |
| 27 | OLANZAPINE | 02325667 | OXAZEPAM  | 00497754 | RANITIDINE HCL | 02230004 |
| 28 | OLANZAPINE | 02372827 | OXAZEPAM  | 02232721 | RANITIDINE HCL | 02367386 |
| 29 | OLANZAPINE | 02403072 | OXAZEPAM  | 00497762 | RANITIDINE HCL | 02336502 |
| 30 |            |          |           |          |                |          |
| 31 | OLANZAPINE | 02337886 | OXAZEPAM  | 02232727 | RANITIDINE HCL | 00641790 |
| 32 | OLANZAPINE | 02310368 | OXAZEPAM  | 00497770 | RANITIDINE HCL | 00865745 |
| 33 | OLANZAPINE | 02307413 | OXAZEPAM  | 02232732 | RANITIDINE HCL | 00828688 |
| 34 |            |          |           |          |                |          |
| 35 | OLANZAPINE | 02303159 | OXAZEPAM  | 00483915 | RANITIDINE HCL | 00828556 |
| 36 | OLANZAPINE | 02281805 | OXAZEPAM  | 00483907 | RANITIDINE HCL | 00733067 |
| 37 | OLANZAPINE | 02276720 | OXAZEPAM  | 00726362 | RANITIDINE HCL | 02212358 |
| 38 |            |          |           |          |                |          |
| 39 | OLANZAPINE | 02229269 | OXAZEPAM  | 00726370 | RANITIDINE HCL | 02207788 |
| 40 | OLANZAPINE | 02243086 | OXAZEPAM  | 00726389 | RANITIDINE HCL | 00191213 |
| 41 | OLANZAPINE | 02307464 | OXAZEPAM  | 00568392 | RANITIDINE HCL | 00740748 |
| 42 | OLANZAPINE | 02303191 | OXAZEPAM  | 00568406 | RANITIDINE HCL | 00849421 |
| 43 |            |          |           |          |                |          |
| 44 | OLANZAPINE | 02414090 | OXAZEPAM  | 00568414 | RANITIDINE HCL | 00849448 |
| 45 | OLANZAPINE | 02321343 | TEMAZEPAM | 02273039 | RANITIDINE HCL | 00990230 |
| 46 | OLANZAPINE | 02406624 | TEMAZEPAM | 02243023 | RANITIDINE HCL | 01951823 |
| 47 |            |          |           |          |                |          |
| 48 | OLANZAPINE | 02360616 | TEMAZEPAM | 02230095 | RANITIDINE HCL | 01951831 |
| 49 | OLANZAPINE | 02327775 | TEMAZEPAM | 02231615 | RANITIDINE HCL | 02076284 |
| 50 | OLANZAPINE | 02327562 | TEMAZEPAM | 02244814 | RANITIDINE HCL | 02076292 |
| 51 | OLANZAPINE | 02389088 | TEMAZEPAM | 02229455 | RANITIDINE HCL | 02212382 |
| 52 |            |          |           |          |                |          |
| 53 | OLANZAPINE | 02382709 | TEMAZEPAM | 00604453 | RANITIDINE HCL | 02213397 |
| 54 | OLANZAPINE | 02428016 | TEMAZEPAM | 02225964 | RANITIDINE HCL | 02213494 |
| 55 | OLANZAPINE | 02421240 | TEMAZEPAM | 02223570 | RANITIDINE HCL | 02213508 |
| 56 |            |          |           |          |                |          |
| 57 | OLANZAPINE | 02417251 | TEMAZEPAM | 02225972 | RANITIDINE HCL | 02213516 |
| 58 |            |          |           |          |                |          |
| 59 |            |          |           |          |                |          |
| 60 |            |          |           |          |                |          |

1  
2  
3  
4  
5  
6  
7  
8  
9  
10  
11  
12  
13  
14  
15  
16  
17  
18  
19  
20  
21  
22  
23  
24  
25  
26  
27  
28  
29  
30  
31  
32  
33  
34  
35  
36  
37  
38  
39  
40  
41  
42  
43  
44  
45  
46  
47  
48  
49  
50  
51  
52  
53  
54  
55  
56  
57  
58  
59  
60

|            |          |           |          |                |          |
|------------|----------|-----------|----------|----------------|----------|
| OLANZAPINE | 02436965 | TEMAZEPAM | 02223589 | RANITIDINE HCL | 02213524 |
| OLANZAPINE | 02325675 | TEMAZEPAM | 00604461 | RANITIDINE HCL | 02219077 |
| OLANZAPINE | 02372835 | TEMAZEPAM | 02273047 | RANITIDINE HCL | 02219085 |
| OLANZAPINE | 02403080 | TEMAZEPAM | 02243024 | RANITIDINE HCL | 02229562 |
| OLANZAPINE | 02337894 | TEMAZEPAM | 02230102 | RANITIDINE HCL | 02229563 |
| OLANZAPINE | 02310376 | TEMAZEPAM | 02231616 | RANITIDINE HCL | 02230287 |
| OLANZAPINE | 02303167 | TEMAZEPAM | 02244815 | RANITIDINE HCL | 02230507 |
| OLANZAPINE | 02281813 | TEMAZEPAM | 02229456 | RANITIDINE HCL | 02231487 |
| OLANZAPINE | 02276739 | TEMAZEPAM | 00513881 | RANITIDINE HCL | 02237829 |
| OLANZAPINE | 02229277 | TEMAZEPAM | 00518166 | RANITIDINE HCL | 02238579 |
| OLANZAPINE | 02428024 | TEMAZEPAM | 02229756 | RANITIDINE HCL | 02238893 |
| OLANZAPINE | 02421259 | TEMAZEPAM | 02229758 | RANITIDINE HCL | 02241208 |
| OLANZAPINE | 02417278 | TEMAZEPAM | 02229760 | RANITIDINE HCL | 02241422 |
| OLANZAPINE | 02238851 | TEMAZEPAM | 02229761 | RANITIDINE HCL | 02241597 |
| OLANZAPINE | 02243089 | TEMAZEPAM | 02229854 | RANITIDINE HCL | 02242056 |
| OLANZAPINE | 02247099 | TEMAZEPAM | 02230101 | RANITIDINE HCL | 02242057 |
| OLANZAPINE | 02301016 | TEMAZEPAM | 02237294 | RANITIDINE HCL | 02242058 |
| OLANZAPINE | 02301024 | TEMAZEPAM | 02237295 | RANITIDINE HCL | 02243038 |
| OLANZAPINE | 02301032 | TEMAZEPAM | 02239071 | RANITIDINE HCL | 02243039 |
| OLANZAPINE | 02301040 | TEMAZEPAM | 02239072 | RANITIDINE HCL | 02245615 |
| OLANZAPINE | 02301059 | TEMAZEPAM | 02243624 | RANITIDINE HCL | 02245782 |
| OLANZAPINE | 02307324 | TEMAZEPAM | 02247526 | RANITIDINE HCL | 02245783 |
| OLANZAPINE | 02307332 | TEMAZEPAM | 02247527 | RANITIDINE HCL | 02246167 |
| OLANZAPINE | 02307340 | TEMAZEPAM | 02253070 | RANITIDINE HCL | 02246168 |
| OLANZAPINE | 02307359 | TEMAZEPAM | 02253089 | RANITIDINE HCL | 02247551 |
| OLANZAPINE | 02307367 | TEMAZEPAM | 02297957 | RANITIDINE HCL | 02247814 |
| OLANZAPINE | 02307375 | TEMAZEPAM | 02297965 | RANITIDINE HCL | 02247815 |
| OLANZAPINE | 02307383 | TEMAZEPAM | 02347865 | RANITIDINE HCL | 02265591 |
| OLANZAPINE | 02307391 | TEMAZEPAM | 02347873 | RANITIDINE HCL | 02265605 |
| OLANZAPINE | 02307421 | TEMAZEPAM | 06022235 | RANITIDINE HCL | 02266806 |
| OLANZAPINE | 02307456 | TEMAZEPAM | 22123262 | RANITIDINE HCL | 02277301 |
| OLANZAPINE | 02307472 | TEMAZEPAM | 99101293 | RANITIDINE HCL | 02284022 |
| OLANZAPINE | 02307480 | TEMAZEPAM | 02244814 | RANITIDINE HCL | 02286106 |
| OLANZAPINE | 02310015 | TEMAZEPAM | 02244815 | RANITIDINE HCL | 02286114 |
| OLANZAPINE | 02310031 | TEMAZEPAM | 02229756 | RANITIDINE HCL | 02291282 |
| OLANZAPINE | 02310058 | TEMAZEPAM | 02229758 | RANITIDINE HCL | 02293471 |
| OLANZAPINE | 02310082 | TEMAZEPAM | 02231615 | RANITIDINE HCL | 02296160 |
| OLANZAPINE | 02310090 | TEMAZEPAM | 02231616 | RANITIDINE HCL | 02298740 |
| OLANZAPINE | 02310406 | TEMAZEPAM | 02347865 | RANITIDINE HCL | 02298902 |
| OLANZAPINE | 02311968 | TEMAZEPAM | 02347873 | RANITIDINE HCL | 02303221 |
| OLANZAPINE | 02311976 | TEMAZEPAM | 02223570 | RANITIDINE HCL | 02303353 |
| OLANZAPINE | 02311984 | TEMAZEPAM | 02223589 | RANITIDINE HCL | 02303388 |
| OLANZAPINE | 02311992 | TEMAZEPAM | 02239071 | RANITIDINE HCL | 02323699 |

|    |            |          |           |          |                |          |
|----|------------|----------|-----------|----------|----------------|----------|
| 1  |            |          |           |          |                |          |
| 2  | OLANZAPINE | 02312018 | TEMAZEPAM | 02239072 | RANITIDINE HCL | 02323702 |
| 3  |            |          |           |          |                |          |
| 4  | OLANZAPINE | 02321386 | TEMAZEPAM | 02297957 | RANITIDINE HCL | 02327244 |
| 5  | OLANZAPINE | 02325713 | TEMAZEPAM | 02297965 | RANITIDINE HCL | 02327252 |
| 6  | OLANZAPINE | 02327597 | TEMAZEPAM | 02273039 | RANITIDINE HCL | 02342871 |
| 7  |            |          |           |          |                |          |
| 8  | OLANZAPINE | 02327805 | TEMAZEPAM | 02273047 | RANITIDINE HCL | 02342898 |
| 9  | OLANZAPINE | 02333015 | TEMAZEPAM | 02229455 | RANITIDINE HCL | 02343436 |
| 10 | OLANZAPINE | 02337126 | TEMAZEPAM | 02229456 | RANITIDINE HCL | 02343444 |
| 11 | OLANZAPINE | 02337134 | TEMAZEPAM | 02243023 | RANITIDINE HCL | 02350203 |
| 12 |            |          |           |          |                |          |
| 13 | OLANZAPINE | 02337142 | TEMAZEPAM | 02243024 | RANITIDINE HCL | 02350211 |
| 14 | OLANZAPINE | 02337150 | TEMAZEPAM | 02225964 | RANITIDINE HCL | 02353016 |
| 15 | OLANZAPINE | 02337169 | TEMAZEPAM | 02225972 | RANITIDINE HCL | 02353024 |
| 16 |            |          |           |          |                |          |
| 17 | OLANZAPINE | 02337924 | TEMAZEPAM | 02229760 | RANITIDINE HCL | 02363526 |
| 18 | OLANZAPINE | 02338211 | TEMAZEPAM | 02229761 | RANITIDINE HCL | 02368005 |
| 19 | OLANZAPINE | 02338238 | TEMAZEPAM | 02230095 | RANITIDINE HCL | 02385953 |
| 20 | OLANZAPINE | 02338246 | TEMAZEPAM | 02230102 | RANITIDINE HCL | 02400103 |
| 21 |            |          |           |          |                |          |
| 22 | OLANZAPINE | 02338254 | TRIAZOLAM | 00512559 | RANITIDINE HCL | 02443708 |
| 23 | OLANZAPINE | 02338262 | TRIAZOLAM | 00614351 | RANITIDINE HCL | 02443716 |
| 24 | OLANZAPINE | 02338270 | TRIAZOLAM | 01995227 | RANITIDINE HCL | 02463717 |
| 25 |            |          |           |          |                |          |
| 26 | OLANZAPINE | 02338289 | TRIAZOLAM | 00808563 | RANITIDINE HCL | 02463725 |
| 27 | OLANZAPINE | 02338297 | TRIAZOLAM | 00886084 | RANITIDINE HCL | 09991036 |
| 28 | OLANZAPINE | 02338300 | TRIAZOLAM | 02230024 | RANITIDINE HCL | 22123159 |
| 29 | OLANZAPINE | 02338319 | TRIAZOLAM | 02230025 | RANITIDINE HCL | 49828564 |
| 30 |            |          |           |          |                |          |
| 31 | OLANZAPINE | 02338645 | TRIAZOLAM | 00808571 | RANITIDINE HCL | 80000219 |
| 32 | OLANZAPINE | 02338653 | TRIAZOLAM | 00886092 | RANITIDINE HCL | 99100771 |
| 33 | OLANZAPINE | 02338661 | TRIAZOLAM | 00872431 | RANITIDINE HCL | 99100772 |
| 34 |            |          |           |          |                |          |
| 35 | OLANZAPINE | 02339811 | TRIAZOLAM | 01913506 | RANITIDINE HCL | 99101171 |
| 36 | OLANZAPINE | 02339838 | TRIAZOLAM | 00443158 | RANITIDINE HCL | 99101172 |
| 37 | OLANZAPINE | 02339846 | TRIAZOLAM | 00614378 | RANITIDINE HCL | 02219077 |
| 38 |            |          |           |          |                |          |
| 39 | OLANZAPINE | 02343665 | TRIAZOLAM | 00443123 |                |          |
| 40 | OLANZAPINE | 02343673 | TRIAZOLAM | 00443131 |                |          |
| 41 | OLANZAPINE | 02343681 | TRIAZOLAM | 00860816 |                |          |
| 42 | OLANZAPINE | 02343703 | TRIAZOLAM | 00860824 |                |          |
| 43 |            |          |           |          |                |          |
| 44 | OLANZAPINE | 02343827 | TRIAZOLAM | 00872423 |                |          |
| 45 | OLANZAPINE | 02343835 | TRIAZOLAM | 02084406 |                |          |
| 46 | OLANZAPINE | 02343843 | TRIAZOLAM | 02084414 |                |          |
| 47 |            |          |           |          |                |          |
| 48 | OLANZAPINE | 02343851 | TRIAZOLAM | 02232553 |                |          |
| 49 | OLANZAPINE | 02343878 | TRIAZOLAM | 02232554 |                |          |
| 50 | OLANZAPINE | 02343886 | TRIAZOLAM | 05019135 |                |          |
| 51 | OLANZAPINE | 02346044 | TRIAZOLAM | 99100774 |                |          |
| 52 |            |          |           |          |                |          |
| 53 | OLANZAPINE | 02346052 | TRIAZOLAM | 99100775 |                |          |
| 54 | OLANZAPINE | 02346060 | TRIAZOLAM | 00614351 |                |          |
| 55 | OLANZAPINE | 02346079 | TRIAZOLAM | 00614378 |                |          |
| 56 |            |          |           |          |                |          |
| 57 | OLANZAPINE | 02346087 | TRIAZOLAM | 01913506 |                |          |
| 58 |            |          |           |          |                |          |
| 59 |            |          |           |          |                |          |
| 60 |            |          |           |          |                |          |

1  
2  
3  
4  
5  
6  
7  
8  
9  
10  
11  
12  
13  
14  
15  
16  
17  
18  
19  
20  
21  
22  
23  
24  
25  
26  
27  
28  
29  
30  
31  
32  
33  
34  
35  
36  
37  
38  
39  
40  
41  
42  
43  
44  
45  
46  
47  
48  
49  
50  
51  
52  
53  
54  
55  
56  
57  
58  
59  
60

|            |          |           |          |
|------------|----------|-----------|----------|
| OLANZAPINE | 02348101 | TRIAZOLAM | 01995227 |
| OLANZAPINE | 02348128 | TRIAZOLAM | 02232553 |
| OLANZAPINE | 02348136 | TRIAZOLAM | 02232554 |
| OLANZAPINE | 02348144 | TRIAZOLAM | 00808563 |
| OLANZAPINE | 02348152 | TRIAZOLAM | 00808571 |
| OLANZAPINE | 02348160 | TRIAZOLAM | 00860816 |
| OLANZAPINE | 02348179 | TRIAZOLAM | 00860824 |
| OLANZAPINE | 02348187 | TRIAZOLAM | 02230024 |
| OLANZAPINE | 02352974 | TRIAZOLAM | 02230025 |
| OLANZAPINE | 02352982 | ZALEPLON  | 02242219 |
| OLANZAPINE | 02352990 | ZALEPLON  | 02242220 |
| OLANZAPINE | 02353008 | ZALEPLON  | 02297124 |
| OLANZAPINE | 02359707 | ZALEPLON  | 02297132 |
| OLANZAPINE | 02360640 | ZALEPLON  | 09991096 |
| OLANZAPINE | 02367483 | ZALEPLON  | 02242219 |
| OLANZAPINE | 02372717 | ZALEPLON  | 02242220 |
| OLANZAPINE | 02373432 | ZALEPLON  | 02297124 |
| OLANZAPINE | 02373440 | ZALEPLON  | 02297132 |
| OLANZAPINE | 02373459 |           |          |
| OLANZAPINE | 02373467 |           |          |
| OLANZAPINE | 02373475 |           |          |
| OLANZAPINE | 02376229 |           |          |
| OLANZAPINE | 02376237 |           |          |
| OLANZAPINE | 02382733 |           |          |
| OLANZAPINE | 02385864 |           |          |
| OLANZAPINE | 02385872 |           |          |
| OLANZAPINE | 02385880 |           |          |
| OLANZAPINE | 02385899 |           |          |
| OLANZAPINE | 02385902 |           |          |
| OLANZAPINE | 02389126 |           |          |
| OLANZAPINE | 02392399 |           |          |
| OLANZAPINE | 02406659 |           |          |
| OLANZAPINE | 02410176 |           |          |
| OLANZAPINE | 02414120 |           |          |
| OLANZAPINE | 02414554 |           |          |
| OLANZAPINE | 02414562 |           |          |
| OLANZAPINE | 02416522 |           |          |
| OLANZAPINE | 02417308 |           |          |
| OLANZAPINE | 02420538 |           |          |
| OLANZAPINE | 02420546 |           |          |
| OLANZAPINE | 02420554 |           |          |
| OLANZAPINE | 02420562 |           |          |
| OLANZAPINE | 02420570 |           |          |

|    |            |          |
|----|------------|----------|
| 1  |            |          |
| 2  | OLANZAPINE | 02421704 |
| 3  |            |          |
| 4  | OLANZAPINE | 02423944 |
| 5  | OLANZAPINE | 02425114 |
| 6  | OLANZAPINE | 02437007 |
| 7  | OLANZAPINE | 02448750 |
| 8  |            |          |
| 9  | OLANZAPINE | 82229250 |
| 10 | OLANZAPINE | 82229269 |
| 11 | OLANZAPINE | 82243086 |
| 12 |            |          |
| 13 | OLANZAPINE | 82243087 |
| 14 | OLANZAPINE | 99400918 |
| 15 | OLANZAPINE | 02301016 |
| 16 | OLANZAPINE | 02301024 |
| 17 | OLANZAPINE | 02301032 |
| 18 |            |          |
| 19 | OLANZAPINE | 02301040 |
| 20 | OLANZAPINE | 02301059 |
| 21 |            |          |
| 22 | OLANZAPINE | 02311968 |
| 23 | OLANZAPINE | 02311976 |
| 24 | OLANZAPINE | 02311984 |
| 25 |            |          |
| 26 | OLANZAPINE | 02311992 |
| 27 | OLANZAPINE | 02312018 |
| 28 | OLANZAPINE | 02343827 |
| 29 | OLANZAPINE | 02343835 |
| 30 |            |          |
| 31 | OLANZAPINE | 02343843 |
| 32 | OLANZAPINE | 02343851 |
| 33 | OLANZAPINE | 02343878 |
| 34 |            |          |
| 35 | OLANZAPINE | 02343886 |
| 36 | OLANZAPINE | 02348101 |
| 37 | OLANZAPINE | 02348128 |
| 38 | OLANZAPINE | 02348136 |
| 39 |            |          |
| 40 | OLANZAPINE | 02348144 |
| 41 | OLANZAPINE | 02348152 |
| 42 | OLANZAPINE | 02372819 |
| 43 |            |          |
| 44 | OLANZAPINE | 02372827 |
| 45 | OLANZAPINE | 02372835 |
| 46 | OLANZAPINE | 02372843 |
| 47 |            |          |
| 48 | OLANZAPINE | 02372851 |
| 49 | OLANZAPINE | 02385864 |
| 50 | OLANZAPINE | 02385872 |
| 51 | OLANZAPINE | 02385880 |
| 52 |            |          |
| 53 | OLANZAPINE | 02385899 |
| 54 | OLANZAPINE | 02385902 |
| 55 | OLANZAPINE | 02385910 |
| 56 |            |          |
| 57 | OLANZAPINE | 02419386 |
| 58 |            |          |
| 59 |            |          |
| 60 |            |          |

1  
2  
3  
4  
5  
6  
7  
8  
9  
10  
11  
12  
13  
14  
15  
16  
17  
18  
19  
20  
21  
22  
23  
24  
25  
26  
27  
28  
29  
30  
31  
32  
33  
34  
35  
36  
37  
38  
39  
40  
41  
42  
43  
44  
45  
46  
47  
48  
49  
50  
51  
52  
53  
54  
55  
56  
57  
58  
59  
60

|                                       |          |
|---------------------------------------|----------|
| OLANZAPINE                            | 02419394 |
| OLANZAPINE                            | 02419408 |
| OLANZAPINE                            | 02419416 |
| OLANZAPINE                            | 02419424 |
| OLANZAPINE                            | 02419432 |
| OLANZAPINE                            | 02421704 |
| OLANZAPINE FOR INJECTION              | 02416522 |
| OLANZAPINE ODT                        | 02338645 |
| OLANZAPINE ODT                        | 02338653 |
| OLANZAPINE ODT                        | 02338661 |
| OLANZAPINE ODT                        | 02343665 |
| OLANZAPINE ODT                        | 02343673 |
| OLANZAPINE ODT                        | 02343681 |
| OLANZAPINE ODT                        | 02343703 |
| OLANZAPINE ODT                        | 02348160 |
| OLANZAPINE ODT                        | 02348179 |
| OLANZAPINE ODT                        | 02348187 |
| OLANZAPINE ODT                        | 02352974 |
| OLANZAPINE ODT                        | 02352982 |
| OLANZAPINE ODT                        | 02352990 |
| OLANZAPINE ODT                        | 02353008 |
| OLANZAPINE ODT                        | 02425114 |
| OLANZAPINE-ODT                        | 02430444 |
| OLANZAPINE-ODT                        | 02430452 |
| OLANZAPINE-ODT                        | 02430460 |
| OLANZAPINE-ODT                        | 02430479 |
| PALIPERIDONE                          | 02300273 |
| PALIPERIDONE                          | 02300281 |
| PALIPERIDONE                          | 02300303 |
| PALIPERIDONE                          | 02300311 |
| PALIPERIDONE                          | 02331276 |
| PALIPERIDONE (PALIPERIDONE PALMITATE) | 02354209 |
| PALIPERIDONE (PALIPERIDONE PALMITATE) | 02354217 |
| PALIPERIDONE (PALIPERIDONE PALMITATE) | 02354225 |
| PALIPERIDONE (PALIPERIDONE PALMITATE) | 02354233 |
| PALIPERIDONE (PALIPERIDONE PALMITATE) | 02354241 |
| PALIPERIDONE (PALIPERIDONE PALMITATE) | 02455943 |
| PALIPERIDONE (PALIPERIDONE PALMITATE) | 02455986 |
| PALIPERIDONE (PALIPERIDONE PALMITATE) | 02455994 |
| PALIPERIDONE (PALIPERIDONE PALMITATE) | 02456001 |
| PALIPERIDONE PALMITATE                | 02354233 |
| PALIPERIDONE PALMITATE                | 02354241 |
| PALIPERIDONE PALMITATE                | 02455943 |



|    |                        |          |
|----|------------------------|----------|
| 1  |                        |          |
| 2  | PALIPERIDONE PALMITATE | 02455986 |
| 3  | PALIPERIDONE PALMITATE | 02455994 |
| 4  | PALIPERIDONE PALMITATE | 02354217 |
| 5  | PALIPERIDONE PALMITATE | 02456001 |
| 6  | PALIPERIDONE PALMITATE | 02354225 |
| 7  | PALIPERIDONE PALMITATE | 02354209 |
| 8  | PERICIAZINE            | 01926772 |
| 9  | PERICIAZINE            | 00024899 |
| 10 | PERICIAZINE            | 00379301 |
| 11 | PERICIAZINE            | 01926756 |
| 12 | PERICIAZINE            | 01926780 |
| 13 | PERICIAZINE            | 00024880 |
| 14 | PERICIAZINE            | 00379328 |
| 15 | PERICIAZINE            | 00926772 |
| 16 | PERICIAZINE            | 01926764 |
| 17 | PERICIAZINE            | 01926756 |
| 18 | PERICIAZINE            | 01926764 |
| 19 | PERICIAZINE            | 01926772 |
| 20 | PERICIAZINE            | 01926780 |
| 21 | PERICIAZINE            | 02237603 |
| 22 | PERICIAZINE            | 02237604 |
| 23 | PERICIAZINE            | 02237605 |
| 24 | PERICIAZINE            | 02237606 |
| 25 | PERPHENAZINE           | 00481920 |
| 26 | PERPHENAZINE           | 00335096 |
| 27 | PERPHENAZINE           | 00028320 |
| 28 | PERPHENAZINE           | 00028169 |
| 29 | PERPHENAZINE           | 00456039 |
| 30 | PERPHENAZINE           | 00335134 |
| 31 | PERPHENAZINE           | 00028290 |
| 32 | PERPHENAZINE           | 00028150 |
| 33 | PERPHENAZINE           | 00456047 |
| 34 | PERPHENAZINE           | 00335126 |
| 35 | PERPHENAZINE           | 00028304 |
| 36 | PERPHENAZINE           | 00028002 |
| 37 | PERPHENAZINE           | 00456055 |
| 38 | PERPHENAZINE           | 00335118 |
| 39 | PERPHENAZINE           | 00028312 |
| 40 | PERPHENAZINE           | 00294799 |
| 41 | PERPHENAZINE           | 00294802 |
| 42 | PERPHENAZINE           | 00296309 |
| 43 | PERPHENAZINE           | 00296317 |
| 44 | PERPHENAZINE           | 00563722 |
| 45 |                        |          |
| 46 |                        |          |
| 47 |                        |          |
| 48 |                        |          |
| 49 |                        |          |
| 50 |                        |          |
| 51 |                        |          |
| 52 |                        |          |
| 53 |                        |          |
| 54 |                        |          |
| 55 |                        |          |
| 56 |                        |          |
| 57 |                        |          |
| 58 |                        |          |
| 59 |                        |          |
| 60 |                        |          |

|    |                        |          |
|----|------------------------|----------|
| 1  |                        |          |
| 2  | PERPHENAZINE           | 00563730 |
| 3  |                        |          |
| 4  | PERPHENAZINE           | 00563749 |
| 5  | PERPHENAZINE           | 00563757 |
| 6  | PERPHENAZINE           | 00726184 |
| 7  | PERPHENAZINE           | 00726192 |
| 8  |                        |          |
| 9  | PERPHENAZINE           | 00726206 |
| 10 | PERPHENAZINE           | 00726281 |
| 11 | PERPHENAZINE           | 00751898 |
| 12 |                        |          |
| 13 | PERPHENAZINE           | 66124095 |
| 14 | PERPHENAZINE           | 66124096 |
| 15 | PERPHENAZINE           | 99100719 |
| 16 | PERPHENAZINE           | 99100720 |
| 17 | PERPHENAZINE           | 99100721 |
| 18 | PERPHENAZINE           | 99100722 |
| 19 |                        |          |
| 20 | PERPHENAZINE           | 99101199 |
| 21 |                        |          |
| 22 | PERPHENAZINE           | 99101200 |
| 23 | PERPHENAZINE           | 00335096 |
| 24 | PERPHENAZINE           | 00335118 |
| 25 | PERPHENAZINE           | 00335126 |
| 26 | PERPHENAZINE           | 00335134 |
| 27 |                        |          |
| 28 | PERPHENAZINE 16 TAB    | 00563722 |
| 29 | PERPHENAZINE 2 TAB 2MG | 00563757 |
| 30 |                        |          |
| 31 | PERPHENAZINE 8 TAB 8MG | 00563730 |
| 32 | PERPHENAZINE TAB 2MG   | 00456039 |
| 33 | PERPHENAZINE TAB 4MG   | 00456047 |
| 34 | PERPHENAZINE TAB 4MG   | 00563749 |
| 35 |                        |          |
| 36 | PHL-LOXAPINE           | 02236943 |
| 37 | PHL-LOXAPINE           | 02236944 |
| 38 | PHL-LOXAPINE           | 02236945 |
| 39 | PHL-LOXAPINE           | 02236946 |
| 40 | PHL-LOXAPINE           | 02255448 |
| 41 | PHL-LOXAPINE           | 02255456 |
| 42 |                        |          |
| 43 | PHL-OLANZAPINE         | 02307405 |
| 44 | PHL-OLANZAPINE         | 02307413 |
| 45 | PHL-OLANZAPINE         | 02307421 |
| 46 | PHL-OLANZAPINE         | 02307448 |
| 47 | PHL-OLANZAPINE         | 02307456 |
| 48 |                        |          |
| 49 | PHL-OLANZAPINE ODT     | 02307464 |
| 50 | PHL-OLANZAPINE ODT     | 02307472 |
| 51 | PHL-OLANZAPINE ODT     | 02307480 |
| 52 |                        |          |
| 53 | PHL-RISPERIDONE        | 02258439 |
| 54 | PHL-RISPERIDONE        | 02258447 |
| 55 | PHL-RISPERIDONE        | 02258455 |
| 56 |                        |          |
| 57 |                        |          |
| 58 |                        |          |
| 59 |                        |          |
| 60 |                        |          |

|    |                                           |          |
|----|-------------------------------------------|----------|
| 1  |                                           |          |
| 2  | PHL-RISPERIDONE                           | 02258463 |
| 3  | PHL-RISPERIDONE                           | 02258471 |
| 4  | PHL-RISPERIDONE                           | 02258498 |
| 5  | PHL-RISPERIDONE ODT                       | 02294435 |
| 6  | PHL-RISPERIDONE ODT                       | 02294443 |
| 7  | PHL-RISPERIDONE ODT                       | 02294451 |
| 8  | PIMOZIDE                                  | 00573817 |
| 9  | PIMOZIDE                                  | 00313815 |
| 10 | PIMOZIDE                                  | 02245432 |
| 11 | PIMOZIDE                                  | 02245433 |
| 12 | PIMOZIDE                                  | 00313823 |
| 13 | PIMOZIDE                                  | 02239829 |
| 14 | PIMOZIDE                                  | 02239830 |
| 15 | PIMOZIDE                                  | 02239831 |
| 16 | PIMOZIDE                                  | 99100767 |
| 17 | PIMOZIDE                                  | 02245432 |
| 18 | PIMOZIDE                                  | 02245433 |
| 19 | PIPOTIAZINE PALMITATE                     | 00427918 |
| 20 | PIPOTIAZINE PALMITATE                     | 01926667 |
| 21 | PIPOTIAZINE PALMITATE                     | 00427926 |
| 22 | PIPOTIAZINE PALMITATE                     | 00990507 |
| 23 | PIPOTIAZINE PALMITATE                     | 01926675 |
| 24 | PIPOTIAZINE PALMITATE                     | 00894672 |
| 25 | PIPOTIAZINE PALMITATE                     | 02236468 |
| 26 | PIPOTIAZINE PALMITATE                     | 02236471 |
| 27 | PIPOTIAZINE PALMITATE                     | 01926667 |
| 28 | PIPOTIAZINE PALMITATE                     | 01926675 |
| 29 | PMS PERPHENAZINE CONCENTRATE LIQ 3.2MG/ML | 00751898 |
| 30 | PMS PERPHENAZINE TAB 16MG                 | 00726206 |
| 31 | PMS PERPHENAZINE TAB 2MG                  | 00726184 |
| 32 | PMS PERPHENAZINE TAB 4MG                  | 00726192 |
| 33 | PMS PERPHENAZINE TAB 8MG                  | 00726281 |
| 34 | PMS PROCHLORPERAZINE INJ 5MG/ML           | 00753645 |
| 35 | PMS TRIFLUOPERAZINE HCL SYRUP 11.8MG/ML   | 00751871 |
| 36 | PMS TRIFLUOPERAZINE TAB 10MG              | 00726249 |
| 37 | PMS TRIFLUOPERAZINE TAB 1MG               | 00726214 |
| 38 | PMS TRIFLUOPERAZINE TAB 20MG              | 00726257 |
| 39 | PMS TRIFLUOPERAZINE TAB 2MG               | 00726222 |
| 40 | PMS TRIFLUOPERAZINE TAB 5MG               | 00726230 |
| 41 | PMS-ARIPIRAZOLE                           | 02466635 |
| 42 | PMS-ARIPIRAZOLE                           | 02466643 |
| 43 | PMS-ARIPIRAZOLE                           | 02466651 |
| 44 | PMS-ARIPIRAZOLE                           | 02466678 |
| 45 |                                           |          |
| 46 |                                           |          |
| 47 |                                           |          |
| 48 |                                           |          |
| 49 |                                           |          |
| 50 |                                           |          |
| 51 |                                           |          |
| 52 |                                           |          |
| 53 |                                           |          |
| 54 |                                           |          |
| 55 |                                           |          |
| 56 |                                           |          |
| 57 |                                           |          |
| 58 |                                           |          |
| 59 |                                           |          |
| 60 |                                           |          |

|    |                                             |          |
|----|---------------------------------------------|----------|
| 1  |                                             |          |
| 2  | PMS-ARIPIRAZOLE                             | 02466686 |
| 3  |                                             |          |
| 4  | PMS-ARIPIRAZOLE                             | 02466694 |
| 5  | PMS-CLOZAPINE                               | 02240668 |
| 6  | PMS-CLOZAPINE                               | 02240669 |
| 7  | PMS-FLUPHENAZINE DECANOATE                  | 02241928 |
| 8  |                                             |          |
| 9  | PMS-FLUPHENAZINE DECANOATE INJ (BP) 25MG/ML | 02091275 |
| 10 | PMS-HALOPERIDOL SOLN 2MG/ML                 | 00759503 |
| 11 | PMS-HALOPERIDOL-LA                          | 02230707 |
| 12 |                                             |          |
| 13 | PMS-HALOPERIDOL-LA                          | 02230708 |
| 14 | PMS-METHOTRIMEPAZINE                        | 02232903 |
| 15 | PMS-METHOTRIMEPAZINE                        | 02232904 |
| 16 | PMS-METHOTRIMEPAZINE                        | 02232905 |
| 17 |                                             |          |
| 18 | PMS-OLANZAPINE                              | 02303116 |
| 19 | PMS-OLANZAPINE                              | 02303159 |
| 20 | PMS-OLANZAPINE                              | 02303167 |
| 21 |                                             |          |
| 22 | PMS-OLANZAPINE                              | 02303175 |
| 23 | PMS-OLANZAPINE                              | 02303183 |
| 24 | PMS-OLANZAPINE                              | 02367483 |
| 25 |                                             |          |
| 26 | PMS-OLANZAPINE ODT                          | 02303191 |
| 27 | PMS-OLANZAPINE ODT                          | 02303205 |
| 28 | PMS-OLANZAPINE ODT                          | 02303213 |
| 29 | PMS-OLANZAPINE ODT                          | 02423944 |
| 30 |                                             |          |
| 31 | PMS-PIMOZIDE                                | 02239829 |
| 32 | PMS-PIMOZIDE                                | 02239830 |
| 33 | PMS-PIMOZIDE                                | 02239831 |
| 34 |                                             |          |
| 35 | PMS-PROCHLORPERAZINE SUPPOSITOIRES 10MG     | 00753688 |
| 36 | PMS-PROCHLORPERAZINE TAB 10MG               | 00753637 |
| 37 | PMS-PROCHLORPERAZINE TAB 5MG                | 00753661 |
| 38 |                                             |          |
| 39 | PMS-RISPERIDONE                             | 02252007 |
| 40 | PMS-RISPERIDONE                             | 02252015 |
| 41 | PMS-RISPERIDONE                             | 02252023 |
| 42 | PMS-RISPERIDONE                             | 02252031 |
| 43 |                                             |          |
| 44 | PMS-RISPERIDONE                             | 02252058 |
| 45 | PMS-RISPERIDONE                             | 02252066 |
| 46 | PMS-RISPERIDONE                             | 02279266 |
| 47 |                                             |          |
| 48 | PMS-RISPERIDONE ODT                         | 02291770 |
| 49 | PMS-RISPERIDONE ODT                         | 02291789 |
| 50 | PMS-RISPERIDONE ODT                         | 02291797 |
| 51 | PMS-RISPERIDONE ODT                         | 02370697 |
| 52 |                                             |          |
| 53 | PMS-RISPERIDONE ODT                         | 02370700 |
| 54 | PMS-TRIFLUOPERAZINE HCL SYR 1.18MG/ML       | 00776505 |
| 55 | PROCHLORPERAZINE                            | 01927795 |
| 56 |                                             |          |
| 57 | PROCHLORPERAZINE                            | 00789720 |
| 58 |                                             |          |
| 59 |                                             |          |
| 60 |                                             |          |

|    |                                      |          |
|----|--------------------------------------|----------|
| 1  |                                      |          |
| 2  | PROCHLORPERAZINE                     | 00753688 |
| 3  | PROCHLORPERAZINE                     | 00025364 |
| 4  | PROCHLORPERAZINE                     | 00789747 |
| 5  | PROCHLORPERAZINE                     | 00025356 |
| 6  | PROCHLORPERAZINE                     | 00753645 |
| 7  | PROCHLORPERAZINE                     | 00777803 |
| 8  | PROCHLORPERAZINE                     | 00809179 |
| 9  | PROCHLORPERAZINE                     | 09991048 |
| 10 | PROCHLORPERAZINE MESYLATE            | 01927779 |
| 11 | PROCHLORPERAZINE MESYLATE            | 00578185 |
| 12 | PROCHLORPERAZINE MESYLATE            | 00025216 |
| 13 | PROCHLORPERAZINE MESYLATE            | 01927787 |
| 14 | PROCHLORPERAZINE MESYLATE            | 00025100 |
| 15 | PROCHLORPERAZINE MESYLATE            | 00753653 |
| 16 | PROCHLORPERAZINE MESYLATE INJ 5MG/ML | 00789747 |
| 17 | PROMAZINE                            | 00093580 |
| 18 | PROMAZINE                            | 00093599 |
| 19 | PROMAZINE HCL                        | 00017124 |
| 20 | PROMAZINE HCL                        | 00017132 |
| 21 | PROMAZINE HCL                        | 00017140 |
| 22 | PROMAZINE HCL                        | 00030066 |
| 23 | PROMAZINE HCL                        | 00034088 |
| 24 | PROMAZINE HCL                        | 00034177 |
| 25 | PROMAZINE HCL                        | 00034185 |
| 26 | PROMAZINE HCL                        | 00289612 |
| 27 | PROMAZINE HCL                        | 00497509 |
| 28 | PROMAZINE HCL INJ 50MG/ML            | 00497509 |
| 29 | PRO-RISPERIDONE                      | 02312700 |
| 30 | PRO-RISPERIDONE                      | 02312719 |
| 31 | PRO-RISPERIDONE                      | 02312727 |
| 32 | PRO-RISPERIDONE                      | 02312735 |
| 33 | PRO-RISPERIDONE                      | 02312743 |
| 34 | PRO-RISPERIDONE                      | 02312751 |
| 35 | Q-RISPERIDONE                        | 02372622 |
| 36 | Q-RISPERIDONE                        | 02372630 |
| 37 | Q-RISPERIDONE                        | 02372649 |
| 38 | Q-RISPERIDONE                        | 02372657 |
| 39 | Q-RISPERIDONE                        | 02372665 |
| 40 | Q-RISPERIDONE                        | 02372673 |
| 41 | QUETIAPINE                           | 02353202 |
| 42 | QUETIAPINE FUMARATE                  | 02330423 |
| 43 | QUETIAPINE FUMARATE                  | 02399830 |
| 44 | QUETIAPINE FUMARATE                  | 02397102 |
| 45 |                                      |          |
| 46 |                                      |          |
| 47 |                                      |          |
| 48 |                                      |          |
| 49 |                                      |          |
| 50 |                                      |          |
| 51 |                                      |          |
| 52 |                                      |          |
| 53 |                                      |          |
| 54 |                                      |          |
| 55 |                                      |          |
| 56 |                                      |          |
| 57 |                                      |          |
| 58 |                                      |          |
| 59 |                                      |          |
| 60 |                                      |          |

1  
2  
3  
4  
5  
6  
7  
8  
9  
10  
11  
12  
13  
14  
15  
16  
17  
18  
19  
20  
21  
22  
23  
24  
25  
26  
27  
28  
29  
30  
31  
32  
33  
34  
35  
36  
37  
38  
39  
40  
41  
42  
43  
44  
45  
46  
47  
48  
49  
50  
51  
52  
53  
54  
55  
56  
57  
58  
59  
60

|                     |          |
|---------------------|----------|
| QUETIAPINE FUMARATE | 02390213 |
| QUETIAPINE FUMARATE | 02387808 |
| QUETIAPINE FUMARATE | 02438011 |
| QUETIAPINE FUMARATE | 02236952 |
| QUETIAPINE FUMARATE | 02311712 |
| QUETIAPINE FUMARATE | 02317907 |
| QUETIAPINE FUMARATE | 02316099 |
| QUETIAPINE FUMARATE | 02313928 |
| QUETIAPINE FUMARATE | 02314002 |
| QUETIAPINE FUMARATE | 02307812 |
| QUETIAPINE FUMARATE | 02299062 |
| QUETIAPINE FUMARATE | 02296578 |
| QUETIAPINE FUMARATE | 02284243 |
| QUETIAPINE FUMARATE | 02434032 |
| QUETIAPINE FUMARATE | 02439166 |
| QUETIAPINE FUMARATE | 02457237 |
| QUETIAPINE FUMARATE | 02407698 |
| QUETIAPINE FUMARATE | 02240862 |
| QUETIAPINE FUMARATE | 02321513 |
| QUETIAPINE FUMARATE | 02395452 |
| QUETIAPINE FUMARATE | 02457245 |
| QUETIAPINE FUMARATE | 02438046 |
| QUETIAPINE FUMARATE | 02412993 |
| QUETIAPINE FUMARATE | 02407701 |
| QUETIAPINE FUMARATE | 02353199 |
| QUETIAPINE FUMARATE | 02330458 |
| QUETIAPINE FUMARATE | 02399849 |
| QUETIAPINE FUMARATE | 02397110 |
| QUETIAPINE FUMARATE | 02390248 |
| QUETIAPINE FUMARATE | 02387824 |
| QUETIAPINE FUMARATE | 02236953 |
| QUETIAPINE FUMARATE | 02317923 |
| QUETIAPINE FUMARATE | 02316110 |
| QUETIAPINE FUMARATE | 02314010 |
| QUETIAPINE FUMARATE | 02313936 |
| QUETIAPINE FUMARATE | 02311747 |
| QUETIAPINE FUMARATE | 02307839 |
| QUETIAPINE FUMARATE | 02296594 |
| QUETIAPINE FUMARATE | 02284278 |
| QUETIAPINE FUMARATE | 02300192 |
| QUETIAPINE FUMARATE | 02395460 |
| QUETIAPINE FUMARATE | 02434040 |
| QUETIAPINE FUMARATE | 02439182 |

|    |                     |          |
|----|---------------------|----------|
| 1  |                     |          |
| 2  | QUETIAPINE FUMARATE | 02412977 |
| 3  |                     |          |
| 4  | QUETIAPINE FUMARATE | 02353164 |
| 5  | QUETIAPINE FUMARATE | 02330415 |
| 6  | QUETIAPINE FUMARATE | 02399822 |
| 7  | QUETIAPINE FUMARATE | 02397099 |
| 8  |                     |          |
| 9  | QUETIAPINE FUMARATE | 02390205 |
| 10 | QUETIAPINE FUMARATE | 02387794 |
| 11 | QUETIAPINE FUMARATE | 02438003 |
| 12 |                     |          |
| 13 | QUETIAPINE FUMARATE | 02236951 |
| 14 | QUETIAPINE FUMARATE | 02317893 |
| 15 | QUETIAPINE FUMARATE | 02316080 |
| 16 |                     |          |
| 17 | QUETIAPINE FUMARATE | 02313995 |
| 18 | QUETIAPINE FUMARATE | 02313901 |
| 19 | QUETIAPINE FUMARATE | 02311704 |
| 20 | QUETIAPINE FUMARATE | 02307804 |
| 21 |                     |          |
| 22 | QUETIAPINE FUMARATE | 02299054 |
| 23 | QUETIAPINE FUMARATE | 02296551 |
| 24 |                     |          |
| 25 | QUETIAPINE FUMARATE | 02284235 |
| 26 | QUETIAPINE FUMARATE | 02434024 |
| 27 | QUETIAPINE FUMARATE | 02439158 |
| 28 | QUETIAPINE FUMARATE | 02457253 |
| 29 | QUETIAPINE FUMARATE | 02413000 |
| 30 |                     |          |
| 31 | QUETIAPINE FUMARATE | 02407728 |
| 32 | QUETIAPINE FUMARATE | 02395479 |
| 33 | QUETIAPINE FUMARATE | 02330466 |
| 34 |                     |          |
| 35 | QUETIAPINE FUMARATE | 02399857 |
| 36 | QUETIAPINE FUMARATE | 02397129 |
| 37 | QUETIAPINE FUMARATE | 02390256 |
| 38 |                     |          |
| 39 | QUETIAPINE FUMARATE | 02387832 |
| 40 | QUETIAPINE FUMARATE | 02438054 |
| 41 | QUETIAPINE FUMARATE | 02314029 |
| 42 | QUETIAPINE FUMARATE | 02317931 |
| 43 |                     |          |
| 44 | QUETIAPINE FUMARATE | 02316129 |
| 45 | QUETIAPINE FUMARATE | 02313944 |
| 46 | QUETIAPINE FUMARATE | 02311755 |
| 47 |                     |          |
| 48 | QUETIAPINE FUMARATE | 02307847 |
| 49 | QUETIAPINE FUMARATE | 02296608 |
| 50 | QUETIAPINE FUMARATE | 02284286 |
| 51 | QUETIAPINE FUMARATE | 02244107 |
| 52 |                     |          |
| 53 | QUETIAPINE FUMARATE | 02300206 |
| 54 | QUETIAPINE FUMARATE | 02434059 |
| 55 | QUETIAPINE FUMARATE | 02439190 |
| 56 | QUETIAPINE FUMARATE | 02457261 |
| 57 |                     |          |
| 58 |                     |          |
| 59 |                     |          |
| 60 |                     |          |

|    |                     |          |
|----|---------------------|----------|
| 1  |                     |          |
| 2  | QUETIAPINE FUMARATE | 02407736 |
| 3  |                     |          |
| 4  | QUETIAPINE FUMARATE | 02395487 |
| 5  | QUETIAPINE FUMARATE | 02300214 |
| 6  | QUETIAPINE FUMARATE | 02457229 |
| 7  | QUETIAPINE FUMARATE | 02407671 |
| 8  |                     |          |
| 9  | QUETIAPINE FUMARATE | 02395444 |
| 10 | QUETIAPINE FUMARATE | 02300184 |
| 11 | QUETIAPINE FUMARATE | 02284251 |
| 12 |                     |          |
| 13 | QUETIAPINE FUMARATE | 02296586 |
| 14 | QUETIAPINE FUMARATE | 02298996 |
| 15 | QUETIAPINE FUMARATE | 02299003 |
| 16 |                     |          |
| 17 | QUETIAPINE FUMARATE | 02299011 |
| 18 | QUETIAPINE FUMARATE | 02299038 |
| 19 | QUETIAPINE FUMARATE | 02299046 |
| 20 | QUETIAPINE FUMARATE | 02299070 |
| 21 |                     |          |
| 22 | QUETIAPINE FUMARATE | 02299089 |
| 23 | QUETIAPINE FUMARATE | 02299097 |
| 24 | QUETIAPINE FUMARATE | 02307820 |
| 25 |                     |          |
| 26 | QUETIAPINE FUMARATE | 02316102 |
| 27 | QUETIAPINE FUMARATE | 02316692 |
| 28 | QUETIAPINE FUMARATE | 02316706 |
| 29 | QUETIAPINE FUMARATE | 02316714 |
| 30 |                     |          |
| 31 | QUETIAPINE FUMARATE | 02316722 |
| 32 | QUETIAPINE FUMARATE | 02316730 |
| 33 | QUETIAPINE FUMARATE | 02317346 |
| 34 |                     |          |
| 35 | QUETIAPINE FUMARATE | 02317354 |
| 36 | QUETIAPINE FUMARATE | 02317362 |
| 37 | QUETIAPINE FUMARATE | 02317370 |
| 38 |                     |          |
| 39 | QUETIAPINE FUMARATE | 02317915 |
| 40 | QUETIAPINE FUMARATE | 02323737 |
| 41 | QUETIAPINE FUMARATE | 02323745 |
| 42 | QUETIAPINE FUMARATE | 02323753 |
| 43 |                     |          |
| 44 | QUETIAPINE FUMARATE | 02323761 |
| 45 | QUETIAPINE FUMARATE | 02323788 |
| 46 | QUETIAPINE FUMARATE | 02330431 |
| 47 |                     |          |
| 48 | QUETIAPINE FUMARATE | 02333031 |
| 49 | QUETIAPINE FUMARATE | 02333058 |
| 50 | QUETIAPINE FUMARATE | 02333066 |
| 51 | QUETIAPINE FUMARATE | 02333074 |
| 52 |                     |          |
| 53 | QUETIAPINE FUMARATE | 02339153 |
| 54 | QUETIAPINE FUMARATE | 02339161 |
| 55 | QUETIAPINE FUMARATE | 02339188 |
| 56 | QUETIAPINE FUMARATE | 02339196 |
| 57 |                     |          |
| 58 |                     |          |
| 59 |                     |          |
| 60 |                     |          |



|    |                     |          |
|----|---------------------|----------|
| 1  |                     |          |
| 2  | QUETIAPINE FUMARATE | 02340127 |
| 3  |                     |          |
| 4  | QUETIAPINE FUMARATE | 02340135 |
| 5  | QUETIAPINE FUMARATE | 02340143 |
| 6  | QUETIAPINE FUMARATE | 02340151 |
| 7  | QUETIAPINE FUMARATE | 02342596 |
| 8  |                     |          |
| 9  | QUETIAPINE FUMARATE | 02342618 |
| 10 | QUETIAPINE FUMARATE | 02342626 |
| 11 | QUETIAPINE FUMARATE | 02342634 |
| 12 |                     |          |
| 13 | QUETIAPINE FUMARATE | 02342642 |
| 14 | QUETIAPINE FUMARATE | 02353172 |
| 15 | QUETIAPINE FUMARATE | 02353180 |
| 16 |                     |          |
| 17 | QUETIAPINE FUMARATE | 02361892 |
| 18 | QUETIAPINE FUMARATE | 02363925 |
| 19 | QUETIAPINE FUMARATE | 02363933 |
| 20 | QUETIAPINE FUMARATE | 02363941 |
| 21 |                     |          |
| 22 | QUETIAPINE FUMARATE | 02387816 |
| 23 | QUETIAPINE FUMARATE | 02390221 |
| 24 | QUETIAPINE FUMARATE | 02395800 |
| 25 |                     |          |
| 26 | QUETIAPINE FUMARATE | 02395819 |
| 27 | QUETIAPINE FUMARATE | 02395827 |
| 28 | QUETIAPINE FUMARATE | 02400340 |
| 29 | QUETIAPINE FUMARATE | 02400359 |
| 30 |                     |          |
| 31 | QUETIAPINE FUMARATE | 02400367 |
| 32 | QUETIAPINE FUMARATE | 02400375 |
| 33 | QUETIAPINE FUMARATE | 02400383 |
| 34 |                     |          |
| 35 | QUETIAPINE FUMARATE | 02412985 |
| 36 | QUETIAPINE FUMARATE | 02417359 |
| 37 | QUETIAPINE FUMARATE | 02417367 |
| 38 | QUETIAPINE FUMARATE | 02417375 |
| 39 |                     |          |
| 40 | QUETIAPINE FUMARATE | 02417383 |
| 41 | QUETIAPINE FUMARATE | 02417391 |
| 42 | QUETIAPINE FUMARATE | 02417782 |
| 43 |                     |          |
| 44 | QUETIAPINE FUMARATE | 02417790 |
| 45 | QUETIAPINE FUMARATE | 02417804 |
| 46 | QUETIAPINE FUMARATE | 02417812 |
| 47 |                     |          |
| 48 | QUETIAPINE FUMARATE | 02417820 |
| 49 | QUETIAPINE FUMARATE | 02439174 |
| 50 | QUETIAPINE FUMARATE | 02447088 |
| 51 | QUETIAPINE FUMARATE | 02447096 |
| 52 |                     |          |
| 53 | QUETIAPINE FUMARATE | 02447126 |
| 54 | QUETIAPINE FUMARATE | 02447134 |
| 55 | QUETIAPINE FUMARATE | 02447193 |
| 56 |                     |          |
| 57 | QUETIAPINE FUMARATE | 02447207 |
| 58 |                     |          |
| 59 |                     |          |
| 60 |                     |          |

|    |                             |          |
|----|-----------------------------|----------|
| 1  |                             |          |
| 2  | QUETIAPINE FUMARATE         | 02447223 |
| 3  | QUETIAPINE FUMARATE         | 02447258 |
| 4  | QUETIAPINE FUMARATE         | 22123257 |
| 5  | QUETIAPINE FUMARATE         | 82236951 |
| 6  | QUETIAPINE FUMARATE         | 82236952 |
| 7  | RAN-OLANZAPINE              | 02403064 |
| 8  | RAN-OLANZAPINE              | 02403072 |
| 9  | RAN-OLANZAPINE              | 02403080 |
| 10 | RAN-OLANZAPINE              | 02403099 |
| 11 | RAN-OLANZAPINE              | 02403102 |
| 12 | RAN-OLANZAPINE IR           | 02429594 |
| 13 | RAN-OLANZAPINE IR           | 02429608 |
| 14 | RAN-OLANZAPINE IR           | 02429616 |
| 15 | RAN-OLANZAPINE IR           | 02429624 |
| 16 | RAN-OLANZAPINE IR           | 02429632 |
| 17 | RAN-OLANZAPINE IR           | 02429640 |
| 18 | RAN-OLANZAPINE ODT          | 02414090 |
| 19 | RAN-OLANZAPINE ODT          | 02414104 |
| 20 | RAN-OLANZAPINE ODT          | 02414112 |
| 21 | RAN-OLANZAPINE ODT          | 02414120 |
| 22 | RAN-RISPERIDONE             | 02280906 |
| 23 | RAN-RISPERIDONE             | 02280914 |
| 24 | RAN-RISPERIDONE             | 02280922 |
| 25 | RAN-RISPERIDONE             | 02280930 |
| 26 | RAN-RISPERIDONE             | 02280949 |
| 27 | RAN-RISPERIDONE             | 02280957 |
| 28 | RAN-RISPERIDONE             | 02328305 |
| 29 | RAN-RISPERIDONE             | 02328313 |
| 30 | RAN-RISPERIDONE             | 02328321 |
| 31 | RAN-RISPERIDONE             | 02328348 |
| 32 | RAN-RISPERIDONE             | 02328364 |
| 33 | RAN-RISPERIDONE             | 02328372 |
| 34 | RATIO-HALOPERIDOL 2MG/ML    | 00552429 |
| 35 | RATIO-HALOPERIDOL TAB 0.5MG | 00552135 |
| 36 | RATIO-HALOPERIDOL TAB 10MG  | 00728306 |
| 37 | RATIO-HALOPERIDOL TAB 1MG   | 00552143 |
| 38 | RATIO-HALOPERIDOL TAB 2MG   | 00728292 |
| 39 | RATIO-HALOPERIDOL TAB 5MG   | 00647969 |
| 40 | RATIO-RISPERIDONE           | 02264757 |
| 41 | RATIO-RISPERIDONE           | 02264765 |
| 42 | RATIO-RISPERIDONE           | 02264773 |
| 43 | RATIO-RISPERIDONE           | 02264781 |
| 44 | RATIO-RISPERIDONE           | 02264803 |
| 45 |                             |          |
| 46 |                             |          |
| 47 |                             |          |
| 48 |                             |          |
| 49 |                             |          |
| 50 |                             |          |
| 51 |                             |          |
| 52 |                             |          |
| 53 |                             |          |
| 54 |                             |          |
| 55 |                             |          |
| 56 |                             |          |
| 57 |                             |          |
| 58 |                             |          |
| 59 |                             |          |
| 60 |                             |          |

|                                              |          |
|----------------------------------------------|----------|
| RATIO-RISPERIDONE                            | 02264811 |
| REMOXIPRIDE HCL                              | 02036363 |
| REMOXIPRIDE HCL                              | 02036371 |
| REMOXIPRIDE HCL                              | 02036398 |
| RHO-FLUPHENAZINE DECANOATE INJ.CONC-100MG/ML | 02211165 |
| RHO-FLUPHENAZINE DECANOATE INJ-25MG/ML IM SC | 02211157 |
| RHO-HALOPERIDOL DECANOATE INJ.-IM 100MG/ML   | 02211149 |
| RHO-HALOPERIDOL DECANOATE INJ.-IM 50MG/ML    | 02211130 |
| RISPERIDONE                                  | 02332051 |
| RISPERIDONE                                  | 02332078 |
| RISPERIDONE                                  | 02371766 |
| RISPERIDONE                                  | 02359790 |
| RISPERIDONE                                  | 02328305 |
| RISPERIDONE                                  | 02359529 |
| RISPERIDONE                                  | 02356880 |
| RISPERIDONE                                  | 02264757 |
| RISPERIDONE                                  | 02252007 |
| RISPERIDONE                                  | 02240551 |
| RISPERIDONE                                  | 02303655 |
| RISPERIDONE                                  | 02303485 |
| RISPERIDONE                                  | 02292807 |
| RISPERIDONE                                  | 02282690 |
| RISPERIDONE                                  | 02282585 |
| RISPERIDONE                                  | 02282240 |
| RISPERIDONE                                  | 02282119 |
| RISPERIDONE                                  | 02280906 |
| RISPERIDONE                                  | 02279509 |
| RISPERIDONE                                  | 02264765 |
| RISPERIDONE                                  | 02264188 |
| RISPERIDONE                                  | 02252015 |
| RISPERIDONE                                  | 02240552 |
| RISPERIDONE                                  | 02303663 |
| RISPERIDONE                                  | 02303493 |
| RISPERIDONE                                  | 02282593 |
| RISPERIDONE                                  | 02282259 |
| RISPERIDONE                                  | 02282127 |
| RISPERIDONE                                  | 02280914 |
| RISPERIDONE                                  | 02279495 |
| RISPERIDONE                                  | 02371774 |
| RISPERIDONE                                  | 02359804 |
| RISPERIDONE                                  | 02328313 |
| RISPERIDONE                                  | 02359537 |
| RISPERIDONE                                  | 02356899 |

|    |             |          |
|----|-------------|----------|
| 1  |             |          |
| 2  | RISPERIDONE | 02247704 |
| 3  |             |          |
| 4  | RISPERIDONE | 02413485 |
| 5  | RISPERIDONE | 02332086 |
| 6  | RISPERIDONE | 02371782 |
| 7  | RISPERIDONE | 02359812 |
| 8  |             |          |
| 9  | RISPERIDONE | 02328321 |
| 10 | RISPERIDONE | 02359545 |
| 11 | RISPERIDONE | 02356902 |
| 12 |             |          |
| 13 | RISPERIDONE | 02264773 |
| 14 | RISPERIDONE | 02264196 |
| 15 | RISPERIDONE | 02258455 |
| 16 |             |          |
| 17 | RISPERIDONE | 02252023 |
| 18 | RISPERIDONE | 02282607 |
| 19 | RISPERIDONE | 02282267 |
| 20 | RISPERIDONE | 02282135 |
| 21 |             |          |
| 22 | RISPERIDONE | 02280922 |
| 23 | RISPERIDONE | 02279800 |
| 24 | RISPERIDONE | 02025280 |
| 25 |             |          |
| 26 | RISPERIDONE | 02247705 |
| 27 | RISPERIDONE | 02291789 |
| 28 | RISPERIDONE | 02413493 |
| 29 | RISPERIDONE | 02236950 |
| 30 |             |          |
| 31 | RISPERIDONE | 02280396 |
| 32 | RISPERIDONE | 02279266 |
| 33 | RISPERIDONE | 02255707 |
| 34 |             |          |
| 35 | RISPERIDONE | 02264781 |
| 36 | RISPERIDONE | 02264218 |
| 37 | RISPERIDONE | 02258463 |
| 38 | RISPERIDONE | 02252031 |
| 39 |             |          |
| 40 | RISPERIDONE | 02303515 |
| 41 | RISPERIDONE | 02282615 |
| 42 | RISPERIDONE | 02282275 |
| 43 |             |          |
| 44 | RISPERIDONE | 02282143 |
| 45 | RISPERIDONE | 02280930 |
| 46 | RISPERIDONE | 02279819 |
| 47 |             |          |
| 48 | RISPERIDONE | 02332094 |
| 49 | RISPERIDONE | 02371790 |
| 50 | RISPERIDONE | 02359820 |
| 51 | RISPERIDONE | 02328348 |
| 52 |             |          |
| 53 | RISPERIDONE | 02359553 |
| 54 | RISPERIDONE | 02356910 |
| 55 | RISPERIDONE | 02025299 |
| 56 |             |          |
| 57 | RISPERIDONE | 02413507 |
| 58 |             |          |
| 59 |             |          |
| 60 |             |          |

Confidential

|    |             |          |
|----|-------------|----------|
| 1  |             |          |
| 2  | RISPERIDONE | 02247706 |
| 3  |             |          |
| 4  | RISPERIDONE | 02291797 |
| 5  | RISPERIDONE | 02255723 |
| 6  | RISPERIDONE | 02264803 |
| 7  | RISPERIDONE | 02264226 |
| 8  |             |          |
| 9  | RISPERIDONE | 02252058 |
| 10 | RISPERIDONE | 02282623 |
| 11 | RISPERIDONE | 02282283 |
| 12 |             |          |
| 13 | RISPERIDONE | 02282151 |
| 14 | RISPERIDONE | 02280949 |
| 15 | RISPERIDONE | 02279827 |
| 16 | RISPERIDONE | 02332108 |
| 17 | RISPERIDONE | 02371804 |
| 18 |             |          |
| 19 | RISPERIDONE | 02328364 |
| 20 | RISPERIDONE | 02359839 |
| 21 |             |          |
| 22 | RISPERIDONE | 02359561 |
| 23 | RISPERIDONE | 02356929 |
| 24 | RISPERIDONE | 02025302 |
| 25 | RISPERIDONE | 02413515 |
| 26 | RISPERIDONE | 02370697 |
| 27 |             |          |
| 28 | RISPERIDONE | 02268086 |
| 29 | RISPERIDONE | 02264811 |
| 30 |             |          |
| 31 | RISPERIDONE | 02264234 |
| 32 | RISPERIDONE | 02258498 |
| 33 | RISPERIDONE | 02252066 |
| 34 |             |          |
| 35 | RISPERIDONE | 02282631 |
| 36 | RISPERIDONE | 02282291 |
| 37 | RISPERIDONE | 02282178 |
| 38 | RISPERIDONE | 02280957 |
| 39 |             |          |
| 40 | RISPERIDONE | 02279835 |
| 41 | RISPERIDONE | 02332116 |
| 42 | RISPERIDONE | 02371812 |
| 43 |             |          |
| 44 | RISPERIDONE | 02328372 |
| 45 | RISPERIDONE | 02359847 |
| 46 | RISPERIDONE | 02359588 |
| 47 | RISPERIDONE | 02356937 |
| 48 | RISPERIDONE | 02025310 |
| 49 |             |          |
| 50 | RISPERIDONE | 02413523 |
| 51 | RISPERIDONE | 02370700 |
| 52 |             |          |
| 53 | RISPERIDONE | 02268094 |
| 54 | RISPERIDONE | 02255758 |
| 55 | RISPERIDONE | 02230455 |
| 56 | RISPERIDONE | 02255715 |
| 57 |             |          |
| 58 |             |          |
| 59 |             |          |
| 60 |             |          |

|    |             |          |
|----|-------------|----------|
| 1  |             |          |
| 2  | RISPERIDONE | 02255731 |
| 3  |             |          |
| 4  | RISPERIDONE | 02255766 |
| 5  | RISPERIDONE | 02258439 |
| 6  | RISPERIDONE | 02258447 |
| 7  | RISPERIDONE | 02258471 |
| 8  |             |          |
| 9  | RISPERIDONE | 02278421 |
| 10 | RISPERIDONE | 02278448 |
| 11 | RISPERIDONE | 02278456 |
| 12 |             |          |
| 13 | RISPERIDONE | 02278464 |
| 14 | RISPERIDONE | 02278472 |
| 15 | RISPERIDONE | 02278480 |
| 16 |             |          |
| 17 | RISPERIDONE | 02283565 |
| 18 | RISPERIDONE | 02283573 |
| 19 | RISPERIDONE | 02283581 |
| 20 | RISPERIDONE | 02283603 |
| 21 |             |          |
| 22 | RISPERIDONE | 02283611 |
| 23 | RISPERIDONE | 02283638 |
| 24 | RISPERIDONE | 02284871 |
| 25 |             |          |
| 26 | RISPERIDONE | 02284898 |
| 27 | RISPERIDONE | 02284901 |
| 28 | RISPERIDONE | 02284928 |
| 29 | RISPERIDONE | 02284936 |
| 30 |             |          |
| 31 | RISPERIDONE | 02284944 |
| 32 | RISPERIDONE | 02289628 |
| 33 | RISPERIDONE | 02289636 |
| 34 |             |          |
| 35 | RISPERIDONE | 02289644 |
| 36 | RISPERIDONE | 02289652 |
| 37 | RISPERIDONE | 02289660 |
| 38 |             |          |
| 39 | RISPERIDONE | 02291770 |
| 40 | RISPERIDONE | 02294435 |
| 41 | RISPERIDONE | 02294443 |
| 42 | RISPERIDONE | 02294451 |
| 43 |             |          |
| 44 | RISPERIDONE | 02294478 |
| 45 | RISPERIDONE | 02294486 |
| 46 | RISPERIDONE | 02294494 |
| 47 |             |          |
| 48 | RISPERIDONE | 02296756 |
| 49 | RISPERIDONE | 02296764 |
| 50 | RISPERIDONE | 02296772 |
| 51 | RISPERIDONE | 02296780 |
| 52 |             |          |
| 53 | RISPERIDONE | 02296799 |
| 54 | RISPERIDONE | 02296802 |
| 55 | RISPERIDONE | 02298465 |
| 56 |             |          |
| 57 | RISPERIDONE | 02303507 |
| 58 |             |          |
| 59 |             |          |
| 60 |             |          |

|    |             |          |
|----|-------------|----------|
| 1  |             |          |
| 2  | RISPERIDONE | 02303523 |
| 3  |             |          |
| 4  | RISPERIDONE | 02303531 |
| 5  | RISPERIDONE | 02309572 |
| 6  | RISPERIDONE | 02312700 |
| 7  | RISPERIDONE | 02312719 |
| 8  |             |          |
| 9  | RISPERIDONE | 02312727 |
| 10 | RISPERIDONE | 02312735 |
| 11 | RISPERIDONE | 02312743 |
| 12 |             |          |
| 13 | RISPERIDONE | 02312751 |
| 14 | RISPERIDONE | 02323516 |
| 15 | RISPERIDONE | 02323524 |
| 16 |             |          |
| 17 | RISPERIDONE | 02323532 |
| 18 | RISPERIDONE | 02323540 |
| 19 | RISPERIDONE | 02323559 |
| 20 | RISPERIDONE | 02323567 |
| 21 |             |          |
| 22 | RISPERIDONE | 02334372 |
| 23 | RISPERIDONE | 02334380 |
| 24 | RISPERIDONE | 02334399 |
| 25 |             |          |
| 26 | RISPERIDONE | 02334402 |
| 27 | RISPERIDONE | 02334410 |
| 28 | RISPERIDONE | 02334429 |
| 29 |             |          |
| 30 | RISPERIDONE | 02335387 |
| 31 | RISPERIDONE | 02335395 |
| 32 | RISPERIDONE | 02335409 |
| 33 | RISPERIDONE | 02335417 |
| 34 |             |          |
| 35 | RISPERIDONE | 02335425 |
| 36 | RISPERIDONE | 02335433 |
| 37 | RISPERIDONE | 02343711 |
| 38 |             |          |
| 39 | RISPERIDONE | 02343738 |
| 40 | RISPERIDONE | 02343746 |
| 41 | RISPERIDONE | 02343754 |
| 42 | RISPERIDONE | 02343762 |
| 43 |             |          |
| 44 | RISPERIDONE | 02343770 |
| 45 | RISPERIDONE | 02359057 |
| 46 | RISPERIDONE | 02359065 |
| 47 |             |          |
| 48 | RISPERIDONE | 02359073 |
| 49 | RISPERIDONE | 02359081 |
| 50 | RISPERIDONE | 02359103 |
| 51 | RISPERIDONE | 02359111 |
| 52 |             |          |
| 53 | RISPERIDONE | 02364344 |
| 54 | RISPERIDONE | 02365413 |
| 55 | RISPERIDONE | 02365421 |
| 56 |             |          |
| 57 | RISPERIDONE | 02365448 |
| 58 |             |          |
| 59 |             |          |
| 60 |             |          |

|    |             |          |
|----|-------------|----------|
| 1  |             |          |
| 2  | RISPERIDONE | 02365456 |
| 3  |             |          |
| 4  | RISPERIDONE | 02365464 |
| 5  | RISPERIDONE | 02365472 |
| 6  | RISPERIDONE | 02367173 |
| 7  | RISPERIDONE | 02367181 |
| 8  |             |          |
| 9  | RISPERIDONE | 02367203 |
| 10 | RISPERIDONE | 02367211 |
| 11 | RISPERIDONE | 02367238 |
| 12 |             |          |
| 13 | RISPERIDONE | 02367246 |
| 14 | RISPERIDONE | 02369079 |
| 15 | RISPERIDONE | 02369087 |
| 16 | RISPERIDONE | 02369095 |
| 17 | RISPERIDONE | 02369117 |
| 18 |             |          |
| 19 | RISPERIDONE | 02369125 |
| 20 | RISPERIDONE | 02369133 |
| 21 |             |          |
| 22 | RISPERIDONE | 02372622 |
| 23 | RISPERIDONE | 02372630 |
| 24 | RISPERIDONE | 02372649 |
| 25 |             |          |
| 26 | RISPERIDONE | 02372657 |
| 27 | RISPERIDONE | 02372665 |
| 28 | RISPERIDONE | 02372673 |
| 29 |             |          |
| 30 | RISPERIDONE | 22123109 |
| 31 | RISPERIDONE | 77292701 |
| 32 | RISPERIDONE | 82025280 |
| 33 | RISPERIDONE | 82025299 |
| 34 |             |          |
| 35 | RISPERIDONE | 02303485 |
| 36 | RISPERIDONE | 02303493 |
| 37 | RISPERIDONE | 02303507 |
| 38 | RISPERIDONE | 02303515 |
| 39 |             |          |
| 40 | RISPERIDONE | 02303523 |
| 41 | RISPERIDONE | 02303531 |
| 42 | RISPERIDONE | 02343711 |
| 43 |             |          |
| 44 | RISPERIDONE | 02343738 |
| 45 | RISPERIDONE | 02343746 |
| 46 | RISPERIDONE | 02343754 |
| 47 |             |          |
| 48 | RISPERIDONE | 02343762 |
| 49 | RISPERIDONE | 02343770 |
| 50 | RISPERIDONE | 02356880 |
| 51 | RISPERIDONE | 02356899 |
| 52 |             |          |
| 53 | RISPERIDONE | 02356902 |
| 54 | RISPERIDONE | 02356910 |
| 55 | RISPERIDONE | 02356929 |
| 56 |             |          |
| 57 | RISPERIDONE | 02356937 |
| 58 |             |          |
| 59 |             |          |
| 60 |             |          |



|    |  |  |
|----|--|--|
| 1  |  |  |
| 2  |  |  |
| 3  |  |  |
| 4  |  |  |
| 5  |  |  |
| 6  |  |  |
| 7  |  |  |
| 8  |  |  |
| 9  |  |  |
| 10 |  |  |
| 11 |  |  |
| 12 |  |  |
| 13 |  |  |
| 14 |  |  |
| 15 |  |  |
| 16 |  |  |
| 17 |  |  |
| 18 |  |  |
| 19 |  |  |
| 20 |  |  |
| 21 |  |  |
| 22 |  |  |
| 23 |  |  |
| 24 |  |  |
| 25 |  |  |
| 26 |  |  |
| 27 |  |  |
| 28 |  |  |
| 29 |  |  |
| 30 |  |  |
| 31 |  |  |
| 32 |  |  |
| 33 |  |  |
| 34 |  |  |
| 35 |  |  |
| 36 |  |  |
| 37 |  |  |
| 38 |  |  |
| 39 |  |  |
| 40 |  |  |
| 41 |  |  |
| 42 |  |  |
| 43 |  |  |
| 44 |  |  |
| 45 |  |  |
| 46 |  |  |
| 47 |  |  |
| 48 |  |  |
| 49 |  |  |
| 50 |  |  |
| 51 |  |  |
| 52 |  |  |
| 53 |  |  |
| 54 |  |  |
| 55 |  |  |
| 56 |  |  |
| 57 |  |  |
| 58 |  |  |
| 59 |  |  |
| 60 |  |  |

|                                    |          |
|------------------------------------|----------|
| RISPERIDONE - 0.25                 | 02296756 |
| RISPERIDONE - 0.5                  | 02296764 |
| RISPERIDONE - 1                    | 02296772 |
| RISPERIDONE - 2                    | 02296780 |
| RISPERIDONE - 3                    | 02296799 |
| RISPERIDONE - 4                    | 02296802 |
| RISPERIDONE (RISPERIDONE TARTRATE) | 02236950 |
| RISPERIDONE TABLETS                | 02332051 |
| RISPERIDONE TABLETS                | 02332078 |
| RISPERIDONE TABLETS                | 02332086 |
| RISPERIDONE TABLETS                | 02332094 |
| RISPERIDONE TABLETS                | 02332108 |
| RISPERIDONE TABLETS                | 02332116 |
| RISPERIDONE TARTRATE               | 02454319 |
| RIVA-ARIPIRAZOLE                   | 02479346 |
| RIVA-ARIPIRAZOLE                   | 02479354 |
| RIVA-ARIPIRAZOLE                   | 02479362 |
| RIVA-ARIPIRAZOLE                   | 02479370 |
| RIVA-ARIPIRAZOLE                   | 02479389 |
| RIVA-ARIPIRAZOLE                   | 02479397 |
| RIVA-OLANZAPINE                    | 02337126 |
| RIVA-OLANZAPINE                    | 02337134 |
| RIVA-OLANZAPINE                    | 02337142 |
| RIVA-OLANZAPINE                    | 02337150 |
| RIVA-OLANZAPINE                    | 02337169 |
| RIVA-OLANZAPINE ODT                | 02339811 |
| RIVA-OLANZAPINE ODT                | 02339838 |
| RIVA-OLANZAPINE ODT                | 02339846 |
| RIVA-OLANZAPINE ODT                | 02392399 |
| RIVA-RISPERIDONE                   | 02283565 |
| RIVA-RISPERIDONE                   | 02283573 |
| RIVA-RISPERIDONE                   | 02283581 |
| RIVA-RISPERIDONE                   | 02283603 |
| RIVA-RISPERIDONE                   | 02283611 |
| RIVA-RISPERIDONE                   | 02283638 |
| SANDOZ ARIPIRAZOLE                 | 02473658 |
| SANDOZ ARIPIRAZOLE                 | 02473666 |
| SANDOZ ARIPIRAZOLE                 | 02473674 |
| SANDOZ ARIPIRAZOLE                 | 02473682 |
| SANDOZ ARIPIRAZOLE                 | 02473690 |
| SANDOZ ARIPIRAZOLE                 | 02473704 |
| SANDOZ CLOZAPINE                   | 02247798 |
| SANDOZ CLOZAPINE                   | 02247805 |

|    |                         |          |
|----|-------------------------|----------|
| 1  |                         |          |
| 2  | SANDOZ OLANZAPINE       | 02310341 |
| 3  |                         |          |
| 4  | SANDOZ OLANZAPINE       | 02310368 |
| 5  | SANDOZ OLANZAPINE       | 02310376 |
| 6  | SANDOZ OLANZAPINE       | 02310384 |
| 7  | SANDOZ OLANZAPINE       | 02310392 |
| 8  |                         |          |
| 9  | SANDOZ OLANZAPINE       | 02310406 |
| 10 | SANDOZ OLANZAPINE ODT   | 02327775 |
| 11 | SANDOZ OLANZAPINE ODT   | 02327783 |
| 12 |                         |          |
| 13 | SANDOZ OLANZAPINE ODT   | 02327791 |
| 14 | SANDOZ OLANZAPINE ODT   | 02327805 |
| 15 | SANDOZ PROCHLORPERAZINE | 00789720 |
| 16 |                         |          |
| 17 | SANDOZ RISPERIDONE      | 02279495 |
| 18 | SANDOZ RISPERIDONE      | 02279509 |
| 19 | SANDOZ RISPERIDONE      | 02279800 |
| 20 | SANDOZ RISPERIDONE      | 02279819 |
| 21 |                         |          |
| 22 | SANDOZ RISPERIDONE      | 02279827 |
| 23 | SANDOZ RISPERIDONE      | 02279835 |
| 24 | SANDOZ RISPERIDONE      | 02292807 |
| 25 |                         |          |
| 26 | SANDOZ RISPERIDONE      | 02303655 |
| 27 | SANDOZ RISPERIDONE      | 02303663 |
| 28 | SULPIRIDE               | 66124173 |
| 29 |                         |          |
| 30 | TEVA-ARIPIRAZOLE        | 02464144 |
| 31 | TEVA-ARIPIRAZOLE        | 02464152 |
| 32 | TEVA-ARIPIRAZOLE        | 02464160 |
| 33 | TEVA-ARIPIRAZOLE        | 02464179 |
| 34 | TEVA-ARIPIRAZOLE        | 02464187 |
| 35 | TEVA-ARIPIRAZOLE        | 02464195 |
| 36 |                         |          |
| 37 | TEVA-CHLORPROMAZINE     | 00232807 |
| 38 | TEVA-CHLORPROMAZINE     | 00232823 |
| 39 |                         |          |
| 40 | TEVA-CHLORPROMAZINE     | 00232831 |
| 41 | TEVA-HALOPERIDOL        | 00363650 |
| 42 | TEVA-HALOPERIDOL        | 00363669 |
| 43 |                         |          |
| 44 | TEVA-HALOPERIDOL        | 00363677 |
| 45 | TEVA-HALOPERIDOL        | 00363685 |
| 46 | TEVA-HALOPERIDOL        | 00713449 |
| 47 |                         |          |
| 48 | TEVA-HALOPERIDOL        | 00768820 |
| 49 | TEVA-OLANZAPINE         | 02276712 |
| 50 | TEVA-OLANZAPINE         | 02276720 |
| 51 | TEVA-OLANZAPINE         | 02276739 |
| 52 |                         |          |
| 53 | TEVA-OLANZAPINE         | 02276747 |
| 54 | TEVA-OLANZAPINE         | 02276755 |
| 55 |                         |          |
| 56 | TEVA-OLANZAPINE         | 02359707 |
| 57 | TEVA-OLANZAPINE OD      | 02321378 |
| 58 |                         |          |
| 59 |                         |          |
| 60 |                         |          |

|    |                          |          |
|----|--------------------------|----------|
| 1  |                          |          |
| 2  | TEVA-OLANZAPINE OD       | 02321386 |
| 3  |                          |          |
| 4  | TEVA-OLANZAPINE ODT      | 02321343 |
| 5  | TEVA-OLANZAPINE ODT      | 02321351 |
| 6  | TEVA-RISPERIDONE         | 02264188 |
| 7  | TEVA-RISPERIDONE         | 02264196 |
| 8  | TEVA-RISPERIDONE         | 02264218 |
| 9  |                          |          |
| 10 | TEVA-RISPERIDONE         | 02264226 |
| 11 | TEVA-RISPERIDONE         | 02264234 |
| 12 |                          |          |
| 13 | TEVA-RISPERIDONE         | 02282690 |
| 14 | THIOPROPAZATE HCL        | 00028614 |
| 15 | THIOPROPERAZINE MESYLATE | 00025763 |
| 16 | THIOPROPERAZINE MESYLATE | 01927639 |
| 17 | THIOPROPERAZINE MESYLATE | 00025747 |
| 18 |                          |          |
| 19 | THIOPROPERAZINE MESYLATE | 00025755 |
| 20 | THIORIDAZINE HCL         | 00456101 |
| 21 | THIORIDAZINE HCL         | 00037478 |
| 22 | THIORIDAZINE HCL         | 00360244 |
| 23 | THIORIDAZINE HCL         | 00027553 |
| 24 | THIORIDAZINE HCL         | 00575143 |
| 25 | THIORIDAZINE HCL         | 00027375 |
| 26 | THIORIDAZINE HCL         | 00456063 |
| 27 | THIORIDAZINE HCL         | 00037508 |
| 28 | THIORIDAZINE HCL         | 00360228 |
| 29 | THIORIDAZINE HCL         | 00027529 |
| 30 | THIORIDAZINE HCL         | 00575119 |
| 31 | THIORIDAZINE HCL         | 00456071 |
| 32 | THIORIDAZINE HCL         | 00037494 |
| 33 | THIORIDAZINE HCL         | 00360198 |
| 34 | THIORIDAZINE HCL         | 00027537 |
| 35 | THIORIDAZINE HCL         | 00575127 |
| 36 | THIORIDAZINE HCL         | 00238775 |
| 37 | THIORIDAZINE HCL         | 02229553 |
| 38 | THIORIDAZINE HCL         | 00027359 |
| 39 | THIORIDAZINE HCL         | 00775320 |
| 40 | THIORIDAZINE HCL         | 00456098 |
| 41 | THIORIDAZINE HCL         | 00037486 |
| 42 | THIORIDAZINE HCL         | 00360236 |
| 43 | THIORIDAZINE HCL         | 00027545 |
| 44 | THIORIDAZINE HCL         | 00575135 |
| 45 | THIORIDAZINE HCL         | 00027561 |
| 46 | THIORIDAZINE HCL         | 00238783 |
| 47 | THIORIDAZINE HCL         | 00238791 |
| 48 | THIORIDAZINE HCL         | 00238805 |
| 49 |                          |          |
| 50 |                          |          |
| 51 |                          |          |
| 52 |                          |          |
| 53 |                          |          |
| 54 |                          |          |
| 55 |                          |          |
| 56 |                          |          |
| 57 |                          |          |
| 58 |                          |          |
| 59 |                          |          |
| 60 |                          |          |

|    |                  |          |
|----|------------------|----------|
| 1  |                  |          |
| 2  | THIORIDAZINE HCL | 00238813 |
| 3  |                  |          |
| 4  | THIORIDAZINE HCL | 00238821 |
| 5  | THIORIDAZINE HCL | 00262587 |
| 6  | THIORIDAZINE HCL | 00268844 |
| 7  | THIORIDAZINE HCL | 00268852 |
| 8  |                  |          |
| 9  | THIORIDAZINE HCL | 00271209 |
| 10 | THIORIDAZINE HCL | 00271217 |
| 11 | THIORIDAZINE HCL | 00271225 |
| 12 |                  |          |
| 13 | THIORIDAZINE HCL | 00272728 |
| 14 | THIORIDAZINE HCL | 00324345 |
| 15 | THIORIDAZINE HCL | 00324353 |
| 16 |                  |          |
| 17 | THIORIDAZINE HCL | 00386537 |
| 18 | THIORIDAZINE HCL | 00386545 |
| 19 | THIORIDAZINE HCL | 00386553 |
| 20 | THIORIDAZINE HCL | 00393541 |
| 21 |                  |          |
| 22 | THIORIDAZINE HCL | 00431125 |
| 23 | THIORIDAZINE HCL | 00431133 |
| 24 | THIORIDAZINE HCL | 00431141 |
| 25 |                  |          |
| 26 | THIORIDAZINE HCL | 00445223 |
| 27 | THIORIDAZINE HCL | 00456381 |
| 28 | THIORIDAZINE HCL | 00502359 |
| 29 | THIORIDAZINE HCL | 00502367 |
| 30 |                  |          |
| 31 | THIORIDAZINE HCL | 00502375 |
| 32 | THIORIDAZINE HCL | 00502383 |
| 33 | THIORIDAZINE HCL | 00776513 |
| 34 |                  |          |
| 35 | THIORIDAZINE HCL | 00885592 |
| 36 | THIORIDAZINE HCL | 00885606 |
| 37 | THIORIDAZINE HCL | 00885614 |
| 38 | THIORIDAZINE HCL | 00903700 |
| 39 |                  |          |
| 40 | THIORIDAZINE HCL | 00903726 |
| 41 | THIORIDAZINE HCL | 66124536 |
| 42 | THIORIDAZINE HCL | 66124538 |
| 43 |                  |          |
| 44 | THIORIDAZINE HCL | 66124547 |
| 45 | THIORIDAZINE HCL | 00027359 |
| 46 | THIORIDAZINE HCL | 00027553 |
| 47 |                  |          |
| 48 | THIORIDAZINE HCL | 00027529 |
| 49 | THIORIDAZINE HCL | 00027561 |
| 50 | THIORIDAZINE HCL | 00027537 |
| 51 | THIORIDAZINE HCL | 00027545 |
| 52 |                  |          |
| 53 | THIORIDAZINE HCL | 00037478 |
| 54 | THIORIDAZINE HCL | 00037508 |
| 55 | THIORIDAZINE HCL | 00037494 |
| 56 | THIORIDAZINE HCL | 00037486 |
| 57 |                  |          |
| 58 |                  |          |
| 59 |                  |          |
| 60 |                  |          |

|    |                              |          |
|----|------------------------------|----------|
| 1  |                              |          |
| 2  | THIORIDAZINE HCL             | 00262587 |
| 3  |                              |          |
| 4  | THIORIDAZINE HCL             | 00575135 |
| 5  | THIORIDAZINE HCL             | 00575143 |
| 6  | THIORIDAZINE HCL             | 00575119 |
| 7  | THIORIDAZINE HCL             | 00775320 |
| 8  |                              |          |
| 9  | THIORIDAZINE HCL             | 00776513 |
| 10 | THIORIDAZINE HCL             | 00575127 |
| 11 | THIORIDAZINE HCL             | 00431125 |
| 12 |                              |          |
| 13 | THIORIDAZINE HCL             | 00431133 |
| 14 | THIORIDAZINE HCL             | 00431141 |
| 15 | THIOTHIXENE                  | 00024457 |
| 16 | THIOTHIXENE                  | 00024430 |
| 17 | THIOTHIXENE                  | 00024449 |
| 18 |                              |          |
| 19 | THIOTHIXENE                  | 00024449 |
| 20 | THIOTHIXENE                  | 00024430 |
| 21 |                              |          |
| 22 | THIOTHIXENE                  | 00024457 |
| 23 | TORRENT-OLANZAPINE ODT       | 02404702 |
| 24 | TORRENT-OLANZAPINE ODT       | 02404729 |
| 25 |                              |          |
| 26 | TORRENT-OLANZAPINE ODT       | 02404737 |
| 27 | TORRENT-OLANZAPINE ODT       | 02404745 |
| 28 | TRIFLUOPERAZINE              | 00017175 |
| 29 | TRIFLUOPERAZINE              | 00131733 |
| 30 |                              |          |
| 31 | TRIFLUOPERAZINE              | 00726214 |
| 32 | TRIFLUOPERAZINE              | 00726222 |
| 33 | TRIFLUOPERAZINE              | 00726230 |
| 34 | TRIFLUOPERAZINE              | 00726249 |
| 35 | TRIFLUOPERAZINE              | 00726257 |
| 36 | TRIFLUOPERAZINE              | 00312746 |
| 37 | TRIFLUOPERAZINE              | 00312754 |
| 38 | TRIFLUOPERAZINE              | 00326836 |
| 39 | TRIFLUOPERAZINE              | 00345539 |
| 40 | TRIFLUOPERAZINE              | 00595942 |
| 41 |                              |          |
| 42 | TRIFLUOPERAZINE 10MG TABLETS | 02232692 |
| 43 | TRIFLUOPERAZINE 1MG TABLETS  | 02232680 |
| 44 | TRIFLUOPERAZINE 2MG TABLETS  | 02232690 |
| 45 | TRIFLUOPERAZINE 5MG TABLETS  | 02232691 |
| 46 | TRIFLUOPERAZINE HCL          | 00298212 |
| 47 | TRIFLUOPERAZINE HCL          | 00027022 |
| 48 | TRIFLUOPERAZINE HCL          | 01918249 |
| 49 | TRIFLUOPERAZINE HCL          | 01918230 |
| 50 | TRIFLUOPERAZINE HCL          | 00021881 |
| 51 | TRIFLUOPERAZINE HCL          | 00326836 |
| 52 | TRIFLUOPERAZINE HCL          | 00280399 |
| 53 |                              |          |
| 54 |                              |          |
| 55 |                              |          |
| 56 |                              |          |
| 57 |                              |          |
| 58 |                              |          |
| 59 |                              |          |
| 60 |                              |          |

|    |                     |          |
|----|---------------------|----------|
| 1  |                     |          |
| 2  | TRIFLUOPERAZINE HCL | 00027170 |
| 3  |                     |          |
| 4  | TRIFLUOPERAZINE HCL | 00249092 |
| 5  | TRIFLUOPERAZINE HCL | 00021857 |
| 6  | TRIFLUOPERAZINE HCL | 00345539 |
| 7  | TRIFLUOPERAZINE HCL | 00027146 |
| 8  |                     |          |
| 9  | TRIFLUOPERAZINE HCL | 00249068 |
| 10 | TRIFLUOPERAZINE HCL | 01918206 |
| 11 | TRIFLUOPERAZINE HCL | 01918257 |
| 12 |                     |          |
| 13 | TRIFLUOPERAZINE HCL | 00026999 |
| 14 | TRIFLUOPERAZINE HCL | 00021865 |
| 15 | TRIFLUOPERAZINE HCL | 00312754 |
| 16 | TRIFLUOPERAZINE HCL | 00013900 |
| 17 | TRIFLUOPERAZINE HCL | 00027154 |
| 18 | TRIFLUOPERAZINE HCL | 00249076 |
| 19 | TRIFLUOPERAZINE HCL | 01918214 |
| 20 | TRIFLUOPERAZINE HCL | 01918222 |
| 21 | TRIFLUOPERAZINE HCL | 00021873 |
| 22 | TRIFLUOPERAZINE HCL | 00312746 |
| 23 | TRIFLUOPERAZINE HCL | 00013919 |
| 24 | TRIFLUOPERAZINE HCL | 00027162 |
| 25 | TRIFLUOPERAZINE HCL | 00271527 |
| 26 | TRIFLUOPERAZINE HCL | 00249084 |
| 27 | TRIFLUOPERAZINE HCL | 00013897 |
| 28 | TRIFLUOPERAZINE HCL | 00013927 |
| 29 | TRIFLUOPERAZINE HCL | 00017183 |
| 30 | TRIFLUOPERAZINE HCL | 00017191 |
| 31 | TRIFLUOPERAZINE HCL | 00017205 |
| 32 | TRIFLUOPERAZINE HCL | 00018473 |
| 33 | TRIFLUOPERAZINE HCL | 00018481 |
| 34 | TRIFLUOPERAZINE HCL | 00018503 |
| 35 | TRIFLUOPERAZINE HCL | 00018511 |
| 36 | TRIFLUOPERAZINE HCL | 00024279 |
| 37 | TRIFLUOPERAZINE HCL | 00024287 |
| 38 | TRIFLUOPERAZINE HCL | 00024295 |
| 39 | TRIFLUOPERAZINE HCL | 00027006 |
| 40 | TRIFLUOPERAZINE HCL | 00027030 |
| 41 | TRIFLUOPERAZINE HCL | 00116734 |
| 42 | TRIFLUOPERAZINE HCL | 00210749 |
| 43 | TRIFLUOPERAZINE HCL | 00210757 |
| 44 | TRIFLUOPERAZINE HCL | 00210838 |
| 45 | TRIFLUOPERAZINE HCL | 00210862 |
| 46 | TRIFLUOPERAZINE HCL | 00255149 |
| 47 | TRIFLUOPERAZINE HCL | 00294861 |
| 48 |                     |          |
| 49 |                     |          |
| 50 |                     |          |
| 51 |                     |          |
| 52 |                     |          |
| 53 |                     |          |
| 54 |                     |          |
| 55 |                     |          |
| 56 |                     |          |
| 57 |                     |          |
| 58 |                     |          |
| 59 |                     |          |
| 60 |                     |          |

|    |                          |          |
|----|--------------------------|----------|
| 1  |                          |          |
| 2  | TRIFLUOPERAZINE HCL      | 00303453 |
| 3  |                          |          |
| 4  | TRIFLUOPERAZINE HCL      | 00345881 |
| 5  | TRIFLUOPERAZINE HCL      | 00345903 |
| 6  | TRIFLUOPERAZINE HCL      | 00345911 |
| 7  | TRIFLUOPERAZINE HCL      | 00346381 |
| 8  |                          |          |
| 9  | TRIFLUOPERAZINE HCL      | 00386502 |
| 10 | TRIFLUOPERAZINE HCL      | 00386510 |
| 11 | TRIFLUOPERAZINE HCL      | 00386529 |
| 12 |                          |          |
| 13 | TRIFLUOPERAZINE HCL      | 00389943 |
| 14 | TRIFLUOPERAZINE HCL      | 00431176 |
| 15 | TRIFLUOPERAZINE HCL      | 00431184 |
| 16 | TRIFLUOPERAZINE HCL      | 00431192 |
| 17 | TRIFLUOPERAZINE HCL      | 00431206 |
| 18 |                          |          |
| 19 | TRIFLUOPERAZINE HCL      | 00451630 |
| 20 | TRIFLUOPERAZINE HCL      | 00460028 |
| 21 |                          |          |
| 22 | TRIFLUOPERAZINE HCL      | 00460044 |
| 23 | TRIFLUOPERAZINE HCL      | 00460052 |
| 24 | TRIFLUOPERAZINE HCL      | 00460060 |
| 25 |                          |          |
| 26 | TRIFLUOPERAZINE HCL      | 00503452 |
| 27 | TRIFLUOPERAZINE HCL      | 00503460 |
| 28 | TRIFLUOPERAZINE HCL      | 00503479 |
| 29 | TRIFLUOPERAZINE HCL      | 00503487 |
| 30 |                          |          |
| 31 | TRIFLUOPERAZINE HCL      | 00595942 |
| 32 | TRIFLUOPERAZINE HCL      | 00751871 |
| 33 | TRIFLUOPERAZINE HCL      | 00886718 |
| 34 |                          |          |
| 35 | TRIFLUOPERAZINE HCL      | 02232680 |
| 36 | TRIFLUOPERAZINE HCL      | 02232690 |
| 37 | TRIFLUOPERAZINE HCL      | 02232691 |
| 38 | TRIFLUOPERAZINE HCL      | 02232692 |
| 39 |                          |          |
| 40 | TRIFLUOPERAZINE TAB 10MG | 00389943 |
| 41 | TRIFLUOPERAZINE TAB 10MG | 00431206 |
| 42 | TRIFLUOPERAZINE TAB 1MG  | 00386529 |
| 43 | TRIFLUOPERAZINE TAB 1MG  | 00431176 |
| 44 | TRIFLUOPERAZINE TAB 2MG  | 00386510 |
| 45 | TRIFLUOPERAZINE TAB 2MG  | 00431184 |
| 46 | TRIFLUOPERAZINE TAB 5MG  | 00386502 |
| 47 | TRIFLUOPERAZINE TAB 5MG  | 00431192 |
| 48 |                          |          |
| 49 | VAN-OLANZAPINE           | 02428008 |
| 50 | VAN-OLANZAPINE           | 02428016 |
| 51 | VAN-OLANZAPINE           | 02428024 |
| 52 | VAN-OLANZAPINE           | 02428032 |
| 53 | VAN-OLANZAPINE           | 02428040 |
| 54 | VAN-OLANZAPINE           | 02428040 |
| 55 | VAN-OLANZAPINE           | 02428040 |
| 56 | VAN-OLANZAPINE ODT       | 02438828 |
| 57 |                          |          |
| 58 |                          |          |
| 59 |                          |          |
| 60 |                          |          |

|    |                                           |          |
|----|-------------------------------------------|----------|
| 1  |                                           |          |
| 2  | VAN-OLANZAPINE ODT                        | 02438836 |
| 3  |                                           |          |
| 4  | VAN-OLANZAPINE ODT                        | 02438844 |
| 5  | VAN-OLANZAPINE ODT                        | 02438852 |
| 6  | ZIPRASIDONE (ZIPRASIDONE HCL MONOHYDRATE) | 02449544 |
| 7  | ZIPRASIDONE (ZIPRASIDONE HCL MONOHYDRATE) | 02449552 |
| 8  |                                           |          |
| 9  | ZIPRASIDONE (ZIPRASIDONE HCL MONOHYDRATE) | 02449560 |
| 10 | ZIPRASIDONE (ZIPRASIDONE HCL MONOHYDRATE) | 02449579 |
| 11 | ZIPRASIDONE (ZIPRASIDONE HCL MONOHYDRATE) | 02441357 |
| 12 |                                           |          |
| 13 | ZIPRASIDONE (ZIPRASIDONE HCL MONOHYDRATE) | 02441365 |
| 14 | ZIPRASIDONE (ZIPRASIDONE HCL MONOHYDRATE) | 02441373 |
| 15 | ZIPRASIDONE (ZIPRASIDONE HCL MONOHYDRATE) | 02441381 |
| 16 |                                           |          |
| 17 | ZIPRASIDONE (ZIPRASIDONE HCL MONOHYDRATE) | 02429365 |
| 18 | ZIPRASIDONE (ZIPRASIDONE HCL MONOHYDRATE) | 02429373 |
| 19 | ZIPRASIDONE (ZIPRASIDONE HCL MONOHYDRATE) | 02429381 |
| 20 | ZIPRASIDONE (ZIPRASIDONE HCL MONOHYDRATE) | 02429403 |
| 21 |                                           |          |
| 22 | ZIPRASIDONE (ZIPRASIDONE HCL MONOHYDRATE) | 02298597 |
| 23 | ZIPRASIDONE (ZIPRASIDONE HCL MONOHYDRATE) | 02298600 |
| 24 | ZIPRASIDONE (ZIPRASIDONE HCL MONOHYDRATE) | 02298619 |
| 25 |                                           |          |
| 26 | ZIPRASIDONE (ZIPRASIDONE HCL MONOHYDRATE) | 02298627 |
| 27 | ZIPRASIDONE (ZIPRASIDONE HCL MONOHYDRATE) | 02478803 |
| 28 | ZIPRASIDONE (ZIPRASIDONE HCL MONOHYDRATE) | 02478811 |
| 29 | ZIPRASIDONE (ZIPRASIDONE HCL MONOHYDRATE) | 02478838 |
| 30 | ZIPRASIDONE (ZIPRASIDONE HCL MONOHYDRATE) | 02478846 |
| 31 |                                           |          |
| 32 | ZIPRASIDONE HCL                           | 02449544 |
| 33 | ZIPRASIDONE HCL                           | 02298597 |
| 34 |                                           |          |
| 35 | ZIPRASIDONE HCL                           | 02298600 |
| 36 | ZIPRASIDONE HCL                           | 02449552 |
| 37 | ZIPRASIDONE HCL                           | 02449560 |
| 38 | ZIPRASIDONE HCL                           | 02298619 |
| 39 |                                           |          |
| 40 | ZIPRASIDONE HCL                           | 02298627 |
| 41 | ZIPRASIDONE HCL                           | 02449579 |
| 42 | ZUCLOPENTHIXOL (ZUCLOPENTHIXOL HCL)       | 02162903 |
| 43 |                                           |          |
| 44 | ZUCLOPENTHIXOL (ZUCLOPENTHIXOL HCL)       | 02162911 |
| 45 | ZUCLOPENTHIXOL (ZUCLOPENTHIXOL HCL)       | 02162938 |
| 46 | ZUCLOPENTHIXOL (ZUCLOPENTHIXOL HCL)       | 02230402 |
| 47 | ZUCLOPENTHIXOL (ZUCLOPENTHIXOL HCL)       | 02230403 |
| 48 |                                           |          |
| 49 | ZUCLOPENTHIXOL (ZUCLOPENTHIXOL HCL)       | 02230404 |
| 50 | ZUCLOPENTHIXOL ACETATE                    | 02230405 |
| 51 | ZUCLOPENTHIXOL ACETATE                    | 02162946 |
| 52 |                                           |          |
| 53 | ZUCLOPENTHIXOL ACETATE                    | 02162946 |
| 54 | ZUCLOPENTHIXOL ACETATE                    | 02230405 |
| 55 |                                           |          |
| 56 | ZUCLOPENTHIXOL DECANOATE                  | 02230406 |
| 57 | ZUCLOPENTHIXOL DECANOATE                  | 02162954 |
| 58 |                                           |          |
| 59 |                                           |          |
| 60 |                                           |          |



|                          |          |
|--------------------------|----------|
| ZUCLOPENTHIXOL DECANOATE | 02162962 |
| ZUCLOPENTHIXOL DECANOATE | 02230407 |
| ZUCLOPENTHIXOL DECANOATE | 02162954 |
| ZUCLOPENTHIXOL DECANOATE | 02162962 |
| ZUCLOPENTHIXOL DECANOATE | 02230406 |
| ZUCLOPENTHIXOL DECANOATE | 02230407 |
| ZUCLOPENTHIXOL HCL       | 02162903 |
| ZUCLOPENTHIXOL HCL       | 02230402 |
| ZUCLOPENTHIXOL HCL       | 02230403 |
| ZUCLOPENTHIXOL HCL       | 02162911 |
| ZUCLOPENTHIXOL HCL       | 02162938 |
| ZUCLOPENTHIXOL HCL       | 02230404 |
| ZUCLOPENTHIXOL HCL       | 00002590 |

Confidential

**Appendix 6.** Administrative data definitions used to define fall or fracture.

|                | Data sources              | Codes                                                                                                                                                                                                                                                                                                                                                                                                                                                                                                                                                                                                                                                                                                                                                                                                                                                                                            |
|----------------|---------------------------|--------------------------------------------------------------------------------------------------------------------------------------------------------------------------------------------------------------------------------------------------------------------------------------------------------------------------------------------------------------------------------------------------------------------------------------------------------------------------------------------------------------------------------------------------------------------------------------------------------------------------------------------------------------------------------------------------------------------------------------------------------------------------------------------------------------------------------------------------------------------------------------------------|
| Fall*          | NACRS or CIHI-DAD         | ICD 10 W00-W19                                                                                                                                                                                                                                                                                                                                                                                                                                                                                                                                                                                                                                                                                                                                                                                                                                                                                   |
| Any Fracture** | NACRS or CIHI-DAD or OHIP | <p><i>Hip</i> (ICD 10 S720, S721; CCI 1VA73, 1VC73, 1VA74, 1VA53, 1VC74, 1VA80)</p> <p><i>Forearm</i> (ICD 10 S52; CCI 1TV73, 1TV74, 1TV03; OHIP F014, F022, F023, F025, F026, F028, F030, F032, F033, F046, F024, F027, F031, Z203)</p> <p><i>Humerus</i> (ICD 10 S422, S423, S424)</p> <p><i>Vertebral</i> (S220, S221, S320, T080, T081)</p> <p><i>Femur</i> (ICD 10 S723; CCI 1VC73, 1VC74, 1VC03, 1VC80; OHIP F095, F096, F097, Z211)</p> <p><i>Pelvis</i> (ICD 10 S321, S322, S324, S323, S325, S327, S328)</p> <p><i>Ankle</i> (ICD 10 S825, S826, S827, S828, S829)</p> <p><i>Patella</i> (ICD 10 S820)</p> <p><i>Tibia/Fibula</i> (ICD 10 S821, S822, S823, S824)</p> <p><i>Ribs/sternum</i> (ICD 10 S222, S223, S224)</p> <p><i>Trunk</i> (ICD 10 S228, S29)</p> <p><i>Scapula</i> (ICD 10 S421, S29)</p> <p><i>Clavicle</i> (ICD 10 S420)</p> <p><i>Other</i> (ICD 10 M844, M843)</p> |

\*Using medical chart abstraction as the reference standard, PPV for ICD 10 codes for falls in NACRS is 91.4% (email communication, Dr Lisa-Ann Fraser, June 2015).

\*\*PPV for the coding combinations for fractures ranges between 0.81-0.96 depending on fracture site. Hip/femur fracture has an estimated PPV of 0.83<sup>1</sup>.

**Reference**

1. Jean S, Candas B, Belzile É, et al. Algorithms can be used to identify fragility fracture cases in physician-claims databases. *Osteoporos Int.* 2012;23(2):483–501.

**Appendix 7.** Cohort description for patients who were dispensed an antipsychotic or a benzodiazepine during the study period.

|                                                                                                  | Before<br>(n=1,533) | After<br>(n=3,707) | Standardized<br>difference |
|--------------------------------------------------------------------------------------------------|---------------------|--------------------|----------------------------|
| <b>Demographics</b>                                                                              |                     |                    |                            |
| Age (Median (IQR))                                                                               | 75 (69-82)          | 74 (69-81)         | 2%                         |
| Male sex                                                                                         | 908 (59.2%)         | 2,144 (57.8%)      | 3%                         |
| Lowest income quintile                                                                           | 269 (17.5%)         | 758 (20.4%)        | 7%                         |
| Highest income quintile                                                                          | 358 (23.4%)         | 734 (19.8%)        | 9%                         |
| Long Term Care resident                                                                          | 22 (1.4%)           | 40 (1.1%)          | 3%                         |
| <b>Comorbidities</b>                                                                             |                     |                    |                            |
| Charlson Comorbidity score (Median (IQR))                                                        | 0 (0-1)             | 0 (0-2)            | 9%                         |
| Chronic Obstructive Pulmonary Disease                                                            | 116 (7.6%)          | 293 (7.9%)         | 1%                         |
| Diabetes                                                                                         | 116 (7.6%)          | 225 (6.1%)         | 6%                         |
| Hypertension                                                                                     | 185 (12.1%)         | 344 (9.3%)         | 9%                         |
| Ischemic heart disease                                                                           | 331 (21.6%)         | 606 (16.3%)        | 13%                        |
| Liver disease                                                                                    | 9 (0.6%)            | 72 (1.9%)          | 12%                        |
| Inflammatory bowel disease                                                                       | 158 (10.3%)         | 453 (12.2%)        | 6%                         |
| Renal disease                                                                                    | 92 (6.0%)           | 367 (9.9%)         | 10%                        |
| Arthritis                                                                                        | 8 (0.5%)            | 23 (0.6%)          | 1%                         |
| Stroke                                                                                           | 50 (3.3%)           | 129 (3.5%)         | 1%                         |
| Cerebrovascular disease                                                                          | 62 (4.0%)           | 159 (4.3%)         | 1%                         |
| Dementia                                                                                         | <=5 (<=0.3%)        | 25 (0.7%)          | 6%                         |
| Congestive heart failure                                                                         | 249 (16.2%)         | 673 (18.2%)        | 5%                         |
| <b>Prior healthcare utilization</b>                                                              |                     |                    |                            |
| Outpatient Internal medicine specialist visits in previous year (Median (IQR))                   | 0 (0-1)             | 0 (0-1)            | 19%                        |
| Primary care visits in previous year (Median (IQR))                                              | 2 (1-6)             | 3 (1-8)            | 9%                         |
| <b>Medication utilization</b>                                                                    |                     |                    |                            |
| Number of medications is previous year (Median (IQR))                                            | 7 (4-11)            | 8 (4-11)           | 6%                         |
| Polypharmacy at admission ( $\geq 10$ different daily prescription medications in the last year) | 539 (35.2%)         | 1,344 (36.3%)      | 2%                         |

IQR: Interquartile Range
